# Supplementary material for: Efficient syntheses of 3-hydroxyimino-1-isoindolinones and 3-methylene-1-isoindolinones via Cu-promoted C–H activation–nitroalkylation–intramolecular cyclization tandem processes
Source: Royal Society of Chemistry journal article supplement (doi:10.1039/c7cc01097d), 2017-01-01
Supplement: c7cc01097d1.pdf [file c7cc01097d1.pdf]

# **Efficient synthesis of 3-hydroxyimino-1-isoindolinones and 3-methylene-1-isoindolinones via Cu-promoted C-H activation-nitroalkylation-intramolecular cyclization tandem processes**

Lin Yu, Hang Huang, Xiang Chen, Liang Hu, Yongqi Yu, Ze Tan\*

## **Supporting Information**

### **Table of contents**

|                                                                                              |           |
|----------------------------------------------------------------------------------------------|-----------|
| <b>1. General information.....</b>                                                           | <b>2</b>  |
| <b>2. Typical procedure for the preparation of benzamides .....</b>                          | <b>2</b>  |
| <b>3. Cu(II)-mediated C-H Functionalization to Form Isoindolinones .....</b>                 | <b>4</b>  |
| 3.1 Optimization of reaction conditions.....                                                 | 4         |
| 3.2 General procedure for copper-mediated C-H Functionalization to Form Isoindolinones ..... | 7         |
| 3.3 Deuterium-labeling experiments.....                                                      | 8         |
| 3.4 Possible reaction mechanism.....                                                         | 9         |
| <b>4. Characterization data of products.....</b>                                             | <b>10</b> |

## 1. General information

$^1\text{H}$  NMR and  $^{13}\text{C}$  NMR were recorded in  $\text{CDCl}_3$  or  $\text{DMSO-d}_6$  at room temperature on the Varian INOVA-400 spectrometer (400 MHz  $^1\text{H}$ ) or Bruker spectrometer (400 MHz  $^1\text{H}$ ). The chemical-shifts scale is based on internal TMS. The peak patterns are indicated as follows: s, singlet; d, doublet; t, triplet; q, quartet; m, multiplet; qui, quintet; sxt, sextet. The coupling constants,  $J$  are reported in Hertz (Hz). Mass spectroscopy data were collected on an HRMS-ESI instrument.

Unless otherwise noted, all reagents were obtained from commercial suppliers and used without further purification. Anhydrous  $\text{Cu}(\text{OAc})_2$  was purchased from Alfa Aesar. All solvents were purified and dried according to standard methods prior to use. Products were purified by flash column chromatography on 200-300 mesh silica gel,  $\text{SiO}_2$ .

## 2. Typical procedure for the preparation of benzamides

All benzamides **1** were synthesized from the corresponding benzoic acids or benzoyl chlorides and 8-aminoquinoline. The deuterated amides were synthesized according to a literature method, spectral properties are consistent with literature values.<sup>1</sup> The *n*-nitropropane, *n*-nitrobutane, nitro-isopentane as well as a nitrophenethane derivative were synthesized according to literature procedures.<sup>2</sup> The following amides were synthesized according to literature procedures.<sup>3</sup>

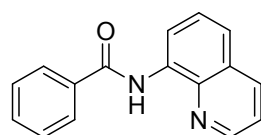

**1a**

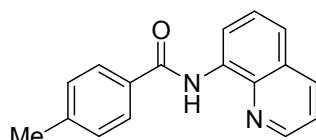

**1b**

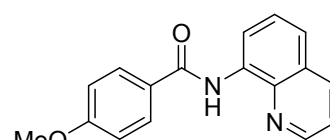

**1c**

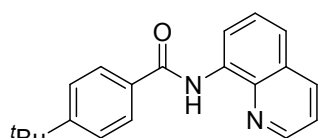

**1d**

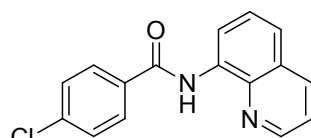

**1e**

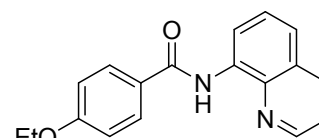

**1f**

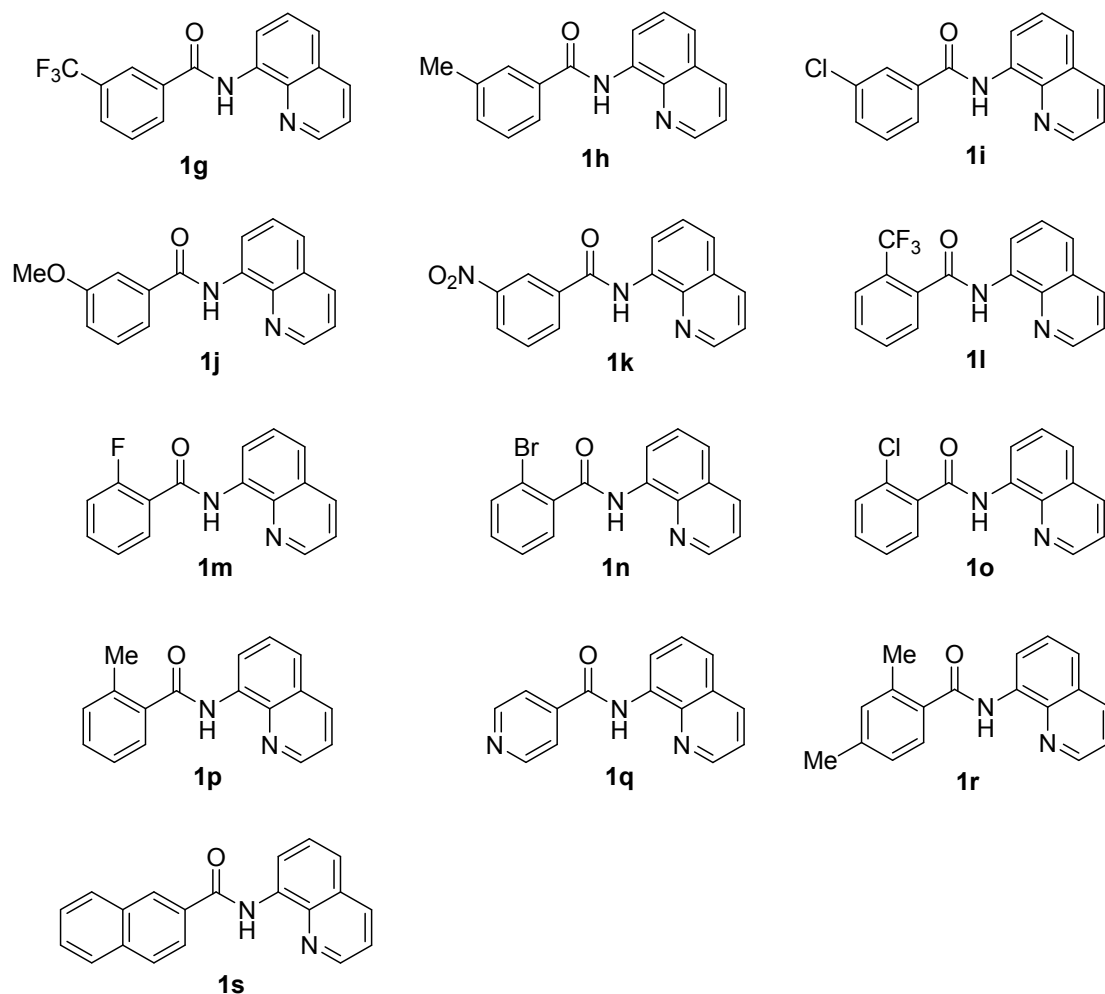

General procedure for the synthesis of benzamide derivatives **1f**, **1r**.

Synthesis of **1f** is representative. 8-Aminoquinoline (1.44 g, 10 mmol) and triethylamine (1.7 mL, 12 mmol) were dissolved in anhydrous  $\text{CH}_2\text{Cl}_2$  (20 mL) in a 100 mL round-bottom flask followed by dropwise addition of 4-ethylbenzoyl chloride (2.18 g, 13 mmol) through syringe. The reaction mixture was stirred overnight. After completion, the reaction was diluted with  $\text{CH}_2\text{Cl}_2$  (20 mL), washed by aqueous HCl (15 mL, 1N),  $\text{NaHCO}_3$  (15 mL of saturated aqueous solution), brine (25 mL), and dried over  $\text{Na}_2\text{SO}_4$ . The organic solvent was removed by evaporation. Purification by column chromatography in petroleum ether/ethyl acetate (8:1) afforded 2.35 g of pure amide (85%) as a white solid.

#### 4-Ethoxy-N-(quinolin-8-yl)benzamide (**1f**)

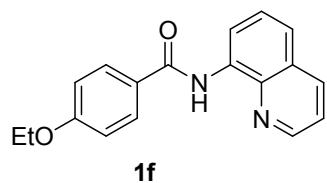

$^1\text{H}$  NMR (400 MHz,  $\text{CDCl}_3$ )  $\delta$  10.67 (s, 1H), 8.93 (d,  $J = 7.2$  Hz, 1H), 8.84 (d,  $J = 4.0$  Hz, 1H), 8.16 (d,  $J = 8.0$  Hz, 1H), 8.05 (d,  $J = 8.4$  Hz, 2H), 7.58 (t,  $J = 8.0$ , 1H), 7.51 (d,  $J = 8.0$  Hz, 1H), 7.47 - 7.44 (m, 1H), 7.02 (d,  $J = 8.4$ , 2H), 4.11 (q,  $J = 6.8$ , 13.6 Hz, 2H), 1.46 (t,  $J = 6.8$  Hz, 3H);  $^{13}\text{C}$  NMR (100 MHz,  $\text{CDCl}_3$ )  $\delta$  165.0, 161.9, 148.2, 138.7, 136.3, 134.8, 129.1, 128.0, 127.5, 127.2, 121.6, 121.3, 116.3, 114.4, 63.7, 14.7.

### 2,4-dimethyl-N-(8-quinolinyl)benzamide (1r)

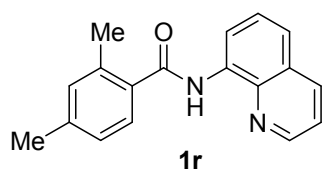

$^1\text{H}$  NMR (400 MHz,  $\text{CDCl}_3$ )  $\delta$  10.23 (s, 1H), 8.95 (d,  $J = 7.6$  Hz, 1H), 8.77 (d,  $J = 4.0$  Hz, 1H), 8.16 (d,  $J = 8.4$  Hz, 1H), 7.63 - 7.52 (m, 3H), 7.44 (m, 1H), 7.13 (br, 2H), 2.60 (s, 3H), 2.39 (s, 3H);  $^{13}\text{C}$  NMR (100 MHz,  $\text{CDCl}_3$ )  $\delta$  168.2, 148.2, 140.4, 138.6, 136.8, 136.3, 134.8, 133.7, 132.1, 127.9, 127.4, 126.6, 121.6, 116.3, 21.2, 20.2.

## 3. Cu(II)-mediated C-H Functionalization to Form Isoindolinones

### 3.1 Optimization of reaction conditions

Table S1. Screening of different Bases

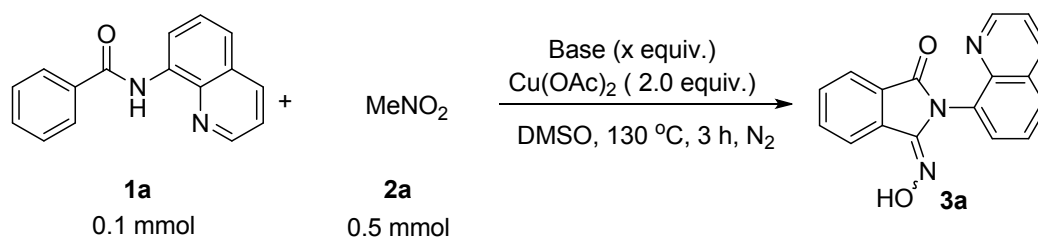

| Entry | Base (equiv.)                 | Yield of 3a(%) <sup>a</sup> |
|-------|-------------------------------|-----------------------------|
| 1     | $\text{K}_3\text{PO}_4$ (2.0) | 22                          |
| 2     | TMEDA (2.0)                   | trace                       |
| 3     | KOAc (2.0)                    | 18                          |
| 4     | $\text{NaHCO}_3$ (2.0)        | 15                          |
| 5     | $\text{K}_2\text{CO}_3$ (2.0) | 38                          |

|    |                            |           |
|----|----------------------------|-----------|
| 6  | KOH (2.0)                  | 32        |
| 7  | <i>t</i> -BuOK (2.0)       | 46        |
| 8  | -                          | 0         |
| 9  | <i>t</i> -BuOK (1.0)       | 39        |
| 10 | <b><i>t</i>-BuOK (3.0)</b> | <b>59</b> |
| 11 | <i>t</i> -BuOK (4.0)       | 46        |

<sup>a</sup> Isolated yield;

**Table S2. Screening of Different Solvents**

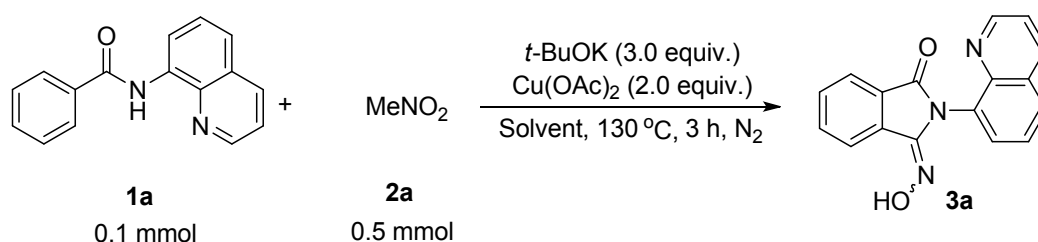

| Entry | Solvent (2mL)      | Yield of <b>3a</b> (%) <sup>a</sup> |
|-------|--------------------|-------------------------------------|
| 1     | DMSO               | 59                                  |
| 2     | DMF                | 48                                  |
| 3     | DMAC               | 42                                  |
| 4     | MeOH               | 0                                   |
| 5     | DME                | 0                                   |
| 6     | DCE                | 32                                  |
| 7     | O-xylene           | 31                                  |
| 8     | CH <sub>3</sub> CN | 18                                  |
| 9     | dioxane            | 24                                  |
| 10    | toluene            | 15                                  |

<sup>a</sup> Isolated yield;

**Table S3. Screening of amount of nitromethane**

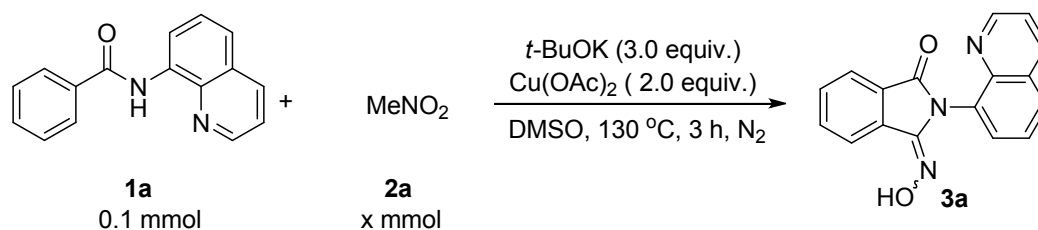

| Entry | Nitromethane    | Yield of 3a(%) <sup>a</sup> |
|-------|-----------------|-----------------------------|
| 1     | —               | 0                           |
| 2     | 2 equiv.        | 39                          |
| 3     | 4 equiv.        | 48                          |
| 4     | <b>5 equiv.</b> | <b>59</b>                   |
| 5     | 6 equiv.        | 58                          |
| 6     | 8 equiv.        | 52                          |
| 7     | 10 equiv.       | 59                          |

<sup>a</sup> Isolated yield;

**Table S4. Screening of Additive**

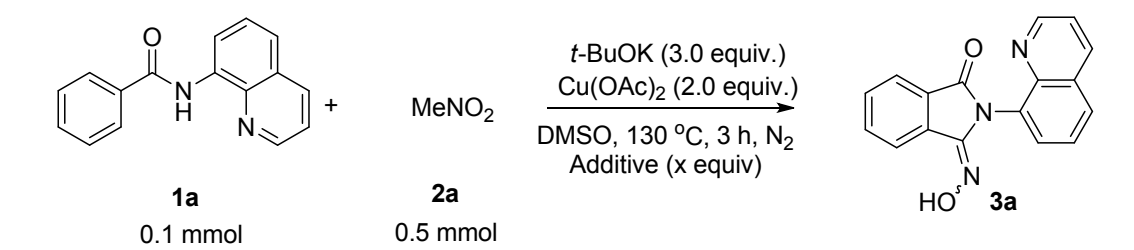

| Entry | Additive (equiv.)        | Yield of 3a(%) <sup>a</sup> |
|-------|--------------------------|-----------------------------|
| 1     | 0                        | 59                          |
| 2     | TBAI (2.0)               | 69                          |
| 3     | TBAB (2.0)               | 61                          |
| 4     | <b>TBAA (2.0)</b>        | <b>78</b>                   |
| 5     | TBAPF <sub>6</sub> (2.0) | trace                       |
| 6     | THAB (2.0)               | 56                          |
| 7     | TBAA (3.0)               | 76                          |

<sup>a</sup> Isolated yield; TBAI = tetrabutylammonium iodide. TBAB = tetrabutylammonium bromide. TBAA = tetrabutylammonium acetate. TBAPF<sub>6</sub> = tetrabutylammonium hexafluorophosphate. THAB = tetraheptylammonium bromide.

**Table S5. Screening of Temperature**

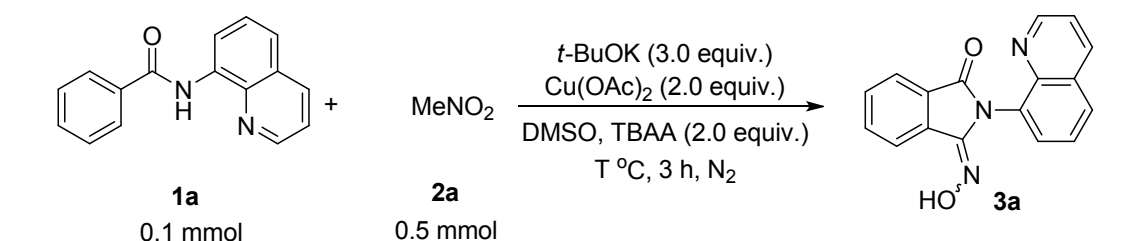

| Entry | Temp.(°C)  | Yield of 3a(%) <sup>a</sup> |
|-------|------------|-----------------------------|
| 1     | r.t.       | 0                           |
| 2     | 60         | 22                          |
| 3     | 90         | 62                          |
| 4     | 120        | 72                          |
| 5     | <b>130</b> | <b>78</b>                   |
| 6     | 140        | 69                          |

<sup>a</sup> Isolated yield;

**Table S6. Screening of Copper salts**

| 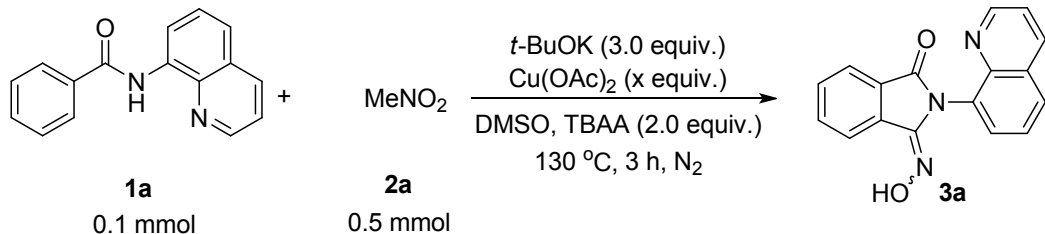 <p><b>1a</b><br/>0.1 mmol</p> <p><b>2a</b><br/>0.5 mmol</p> <p><b>3a</b></p> | <table border="1"> <thead> <tr> <th>Entry</th> <th>Copper salts (equiv.)</th> <th>Yield of 3a(%)<sup>a</sup></th> </tr> </thead> <tbody> <tr> <td>1</td> <td><b>Cu(OAc)<sub>2</sub> (2.0)</b></td> <td><b>78</b></td> </tr> <tr> <td>2</td> <td>CuBr<sub>2</sub> (2.0)</td> <td>61</td> </tr> <tr> <td>3</td> <td>CuCl<sub>2</sub> (2.0)</td> <td>59</td> </tr> <tr> <td>4</td> <td>Cu(OAc)<sub>2</sub>·H<sub>2</sub>O (2.0)</td> <td>64</td> </tr> <tr> <td>5</td> <td>-</td> <td>0</td> </tr> <tr> <td>6</td> <td>Cu(OAc)<sub>2</sub> (1.0)</td> <td>49</td> </tr> <tr> <td>7</td> <td>Cu(OAc)<sub>2</sub> (3.0)</td> <td>76</td> </tr> </tbody> </table> | Entry                       | Copper salts (equiv.) | Yield of 3a(%) <sup>a</sup> | 1 | <b>Cu(OAc)<sub>2</sub> (2.0)</b> | <b>78</b> | 2 | CuBr <sub>2</sub> (2.0) | 61 | 3 | CuCl <sub>2</sub> (2.0) | 59 | 4 | Cu(OAc) <sub>2</sub> ·H <sub>2</sub> O (2.0) | 64 | 5 | - | 0 | 6 | Cu(OAc) <sub>2</sub> (1.0) | 49 | 7 | Cu(OAc) <sub>2</sub> (3.0) | 76 |
|-----------------------------------------------------------------------------------------------------------------------------------------------------------------|-------------------------------------------------------------------------------------------------------------------------------------------------------------------------------------------------------------------------------------------------------------------------------------------------------------------------------------------------------------------------------------------------------------------------------------------------------------------------------------------------------------------------------------------------------------------------------------------------------------------------------------------------------------|-----------------------------|-----------------------|-----------------------------|---|----------------------------------|-----------|---|-------------------------|----|---|-------------------------|----|---|----------------------------------------------|----|---|---|---|---|----------------------------|----|---|----------------------------|----|
| Entry                                                                                                                                                           | Copper salts (equiv.)                                                                                                                                                                                                                                                                                                                                                                                                                                                                                                                                                                                                                                       | Yield of 3a(%) <sup>a</sup> |                       |                             |   |                                  |           |   |                         |    |   |                         |    |   |                                              |    |   |   |   |   |                            |    |   |                            |    |
| 1                                                                                                                                                               | <b>Cu(OAc)<sub>2</sub> (2.0)</b>                                                                                                                                                                                                                                                                                                                                                                                                                                                                                                                                                                                                                            | <b>78</b>                   |                       |                             |   |                                  |           |   |                         |    |   |                         |    |   |                                              |    |   |   |   |   |                            |    |   |                            |    |
| 2                                                                                                                                                               | CuBr <sub>2</sub> (2.0)                                                                                                                                                                                                                                                                                                                                                                                                                                                                                                                                                                                                                                     | 61                          |                       |                             |   |                                  |           |   |                         |    |   |                         |    |   |                                              |    |   |   |   |   |                            |    |   |                            |    |
| 3                                                                                                                                                               | CuCl <sub>2</sub> (2.0)                                                                                                                                                                                                                                                                                                                                                                                                                                                                                                                                                                                                                                     | 59                          |                       |                             |   |                                  |           |   |                         |    |   |                         |    |   |                                              |    |   |   |   |   |                            |    |   |                            |    |
| 4                                                                                                                                                               | Cu(OAc) <sub>2</sub> ·H <sub>2</sub> O (2.0)                                                                                                                                                                                                                                                                                                                                                                                                                                                                                                                                                                                                                | 64                          |                       |                             |   |                                  |           |   |                         |    |   |                         |    |   |                                              |    |   |   |   |   |                            |    |   |                            |    |
| 5                                                                                                                                                               | -                                                                                                                                                                                                                                                                                                                                                                                                                                                                                                                                                                                                                                                           | 0                           |                       |                             |   |                                  |           |   |                         |    |   |                         |    |   |                                              |    |   |   |   |   |                            |    |   |                            |    |
| 6                                                                                                                                                               | Cu(OAc) <sub>2</sub> (1.0)                                                                                                                                                                                                                                                                                                                                                                                                                                                                                                                                                                                                                                  | 49                          |                       |                             |   |                                  |           |   |                         |    |   |                         |    |   |                                              |    |   |   |   |   |                            |    |   |                            |    |
| 7                                                                                                                                                               | Cu(OAc) <sub>2</sub> (3.0)                                                                                                                                                                                                                                                                                                                                                                                                                                                                                                                                                                                                                                  | 76                          |                       |                             |   |                                  |           |   |                         |    |   |                         |    |   |                                              |    |   |   |   |   |                            |    |   |                            |    |

<sup>a</sup> Isolated yield;

### 3.2 General procedure for copper-mediated C-H Functionalization to

#### Form Isoindolinones

Benzamide **1** (0.1 mmol), anhydrous Cu(OAc)<sub>2</sub> (36 mg, 0.2 mmol), *t*-BuOK (34 mg, 0.3 mmol), nitromethane (31 mg, 0.5 mmol), tetrabutylammonium acetate (60 mg, 0.2 mmol) and anhydrous DMSO (2 mL) were added to a 25-mL Schlenk flask equipped with a high-vacuum PTFE valve-to-glass seal. Then the flask was sealed under N<sub>2</sub> and stirred at 130 °C for 3 h. After the reaction was quenched by addition of water, the mixture was extracted with ethyl acetate, and the combined organic layer was dried

over sodium sulfate. Concentration in vacuo followed by silica gel column purification with petroleum ether/ethyl acetate eluent gave the desired product **3**.

Benzamide **1** (0.1 mmol), anhydrous Cu(OAc)<sub>2</sub> (36 mg, 0.2 mmol), *t*-BuOK (34 mg, 0.3 mmol), nitroethane (23 mg, 0.3 mmol), tetrabutylammonium acetate (60 mg, 0.2 mmol) and anhydrous DMSO (2 mL) were added to a 25-mL Schlenk flask equipped with a high-vacuum PTFE valve-to-glass seal. Then the flask was sealed under N<sub>2</sub> and stirred at 130 °C for 3 h. After the reaction was quenched by addition of water, the mixture was extracted with ethyl acetate, and the combined organic layer was dried over sodium sulfate. Concentration in vacuo followed by silica gel column purification with petroleum ether/ethyl acetate eluent gave the desired product **4**.

### 3.3 Deuterium-labeling experiments.

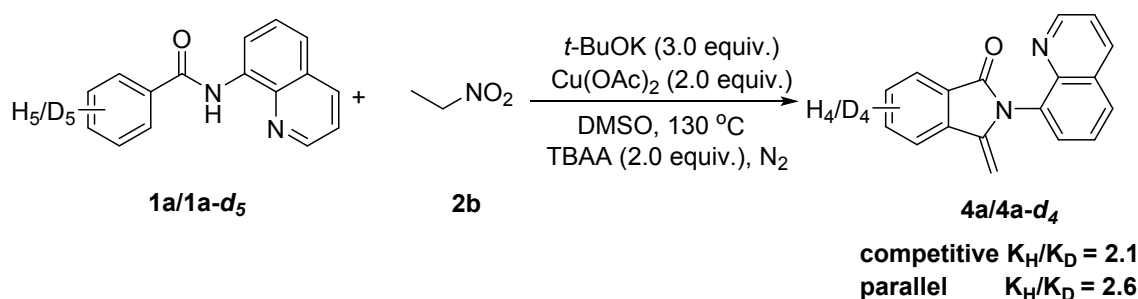

**Intermolecular competition KIE** Following general procedure: **1a** (50 mg, 0.2 mmol), **1a-d<sub>5</sub>** (50 mg, 0.2 mmol), Cu(OAc)<sub>2</sub> (145 mg, 0.8 mmol), *t*-BuOK (135 mg, 1.2 mmol), nitroethane **4a** (150 mg, 2 mmol), tetrabutylammonium acetate (241 mg, 0.8 mmol) and anhydrous DMSO (4 mL) were added to a 75 mL Schlenk flask equipped with a high-vacuum PTFE valve-to-glass seal. Then the flask was sealed under N<sub>2</sub> and stirred at 130 °C for 10 min. The product was separated by column chromatography to give the desired product less than 8 % yield.

<sup>1</sup>H NMR (400 MHz, CDCl<sub>3</sub>): δ 8.90 (d, *J* = 3.8 Hz, 1H), 8.24 (d, *J* = 8.2 Hz, 1H), 7.97 (t, *J* = 8.1 Hz, 1.67H), 7.81-7.76 (m, 1.68H), 7.70-7.63 (m, 1.69H), 7.58 (t, *J* = 7.4 Hz, 0.68H), 7.43 (dd, *J* = 8.2, 4.1 Hz, 1H), 5.19 (s, 1H), 4.41 (s, 1H). The KIE value was calculated as *k<sub>H</sub>/k<sub>D</sub>* = 2.13.

**Intermolecular parallel KIE** Following general procedure: **1a** (50 mg, 0.2 mmol) or **1a-d<sub>5</sub>** (50 mg, 0.2 mmol), Cu(OAc)<sub>2</sub> (145 mg, 0.8 mmol), *t*-BuOK (135 mg, 1.2 mmol), nitroethane **4a** (150 mg, 2 mmol), tetrabutylammonium acetate (241 mg, 0.8 mmol) and anhydrous DMSO (4 mL) were added to a 75 mL Schlenk flask equipped with a high-vacuum PTFE valve-to-glass seal. Then the flask was sealed under N<sub>2</sub> and stirred at 130 °C for 8 min. The product was separated by column chromatography to give the desired product less than 4 % yield.

<sup>1</sup>H NMR (400 MHz, CDCl<sub>3</sub>): δ 8.91 (d, *J* = 1.9 Hz, 1H), 8.25 (d, *J* = 8.2 Hz, 1H), 7.97 (t, *J* = 7.9 Hz, 1.72H), 7.83-7.75 (m, 1.72H), 7.71-7.65 (m, 1.71H), 7.59 (t, *J* = 7.3 Hz, 0.72H), 7.45 (dd, *J* = 7.6, 3.6 Hz, 1H), 5.19 (s, 1H), 4.42 (s, 1H). The KIE value was calculated as *k<sub>H</sub>/k<sub>D</sub>* = 2.57.



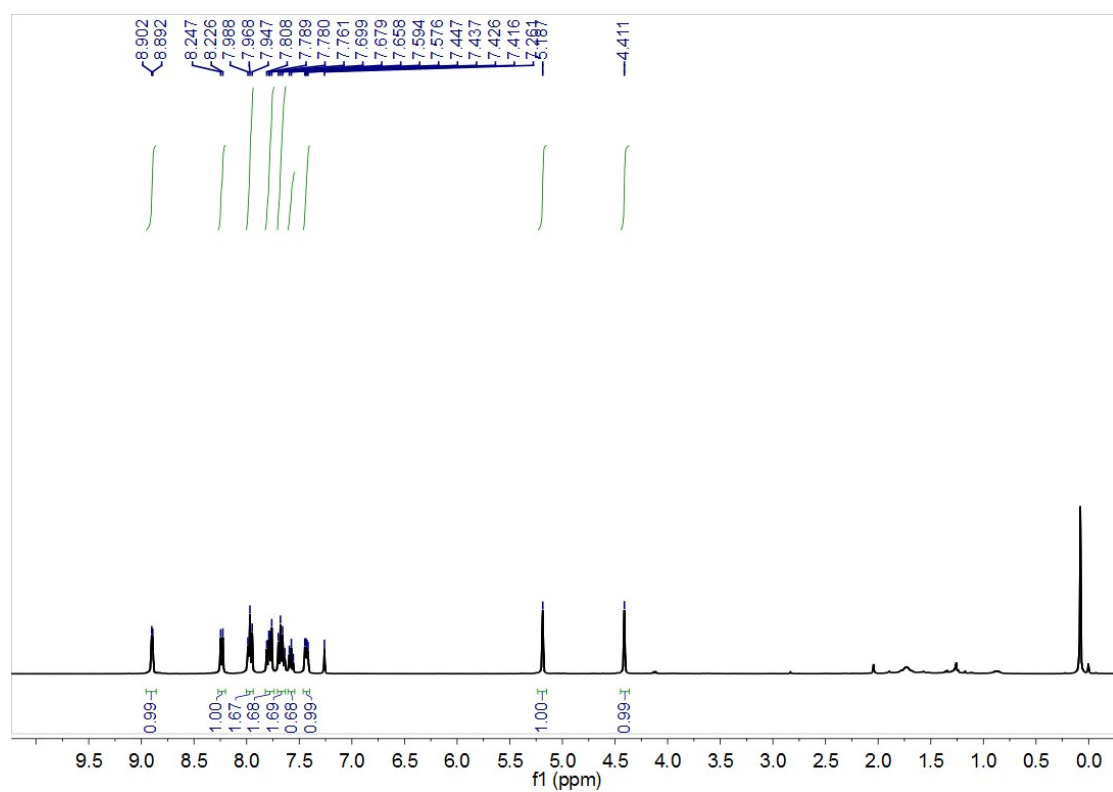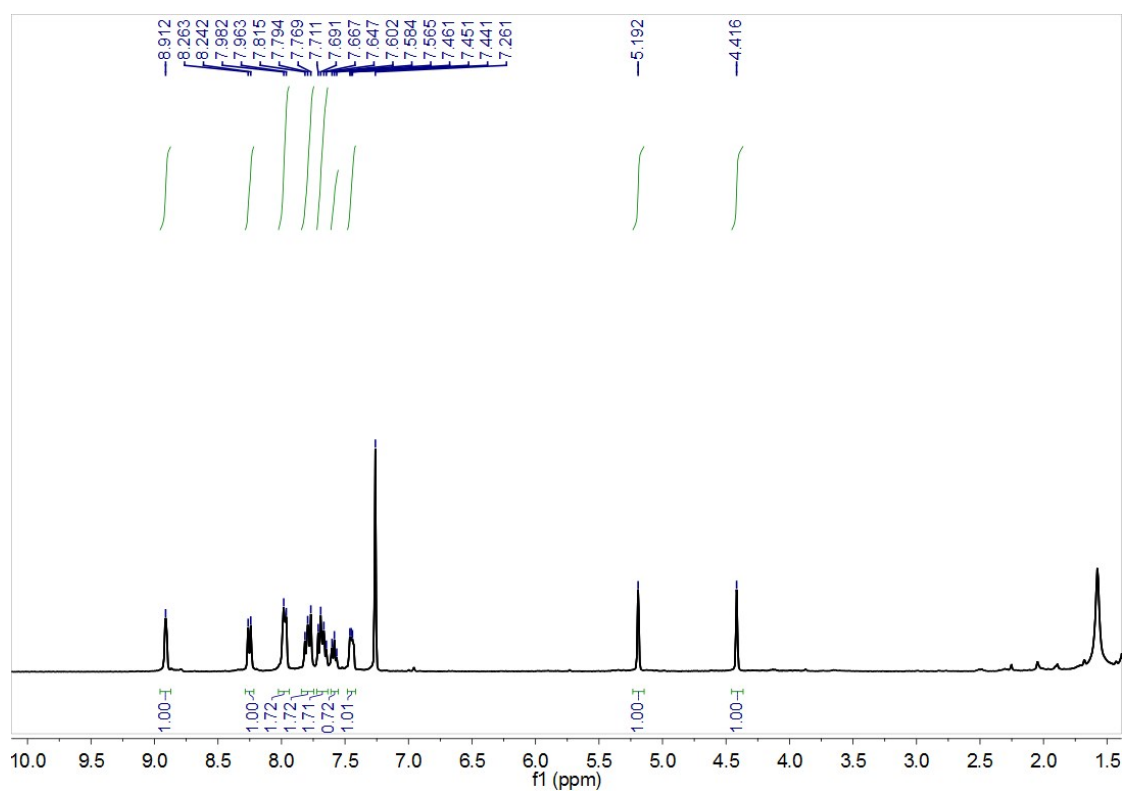

### 3.4 Possible reaction mechanism.

Though the exact mechanism is still not clear at present, based on the experimental evidences and literature precedents,<sup>4</sup> a plausible mechanism is proposed and depicted

in Scheme 1. As reported before, **1a** first reacts with Cu(II) salt to generate intermediate **I** which subsequently undergoes C-H activation to form intermediate **II**. Intermediate **II** next reacts with Cu(II) salt through disproportionation to form Cu(III) intermediate **III**. After reacting with a carboanion generated in situ from nitroalkane and base, **III** will be converted into **IV** which will provide intermediate **V** through reductive elimination. Next **V** is transformed into **VI** via proton shuffling. For the reaction with nitromethane, an intramolecular cyclization takes place to give intermediate **VII'** and the final product **3a** is obtained through dehydration (Path A). As for the reaction with nitroethane and other higher alkyl substituted nitroalkanes, **VI** undergoes a Nef type reaction to give the ketone intermediate **VII** which subsequently cyclizes intramolecularly to give **4a** (Path B).

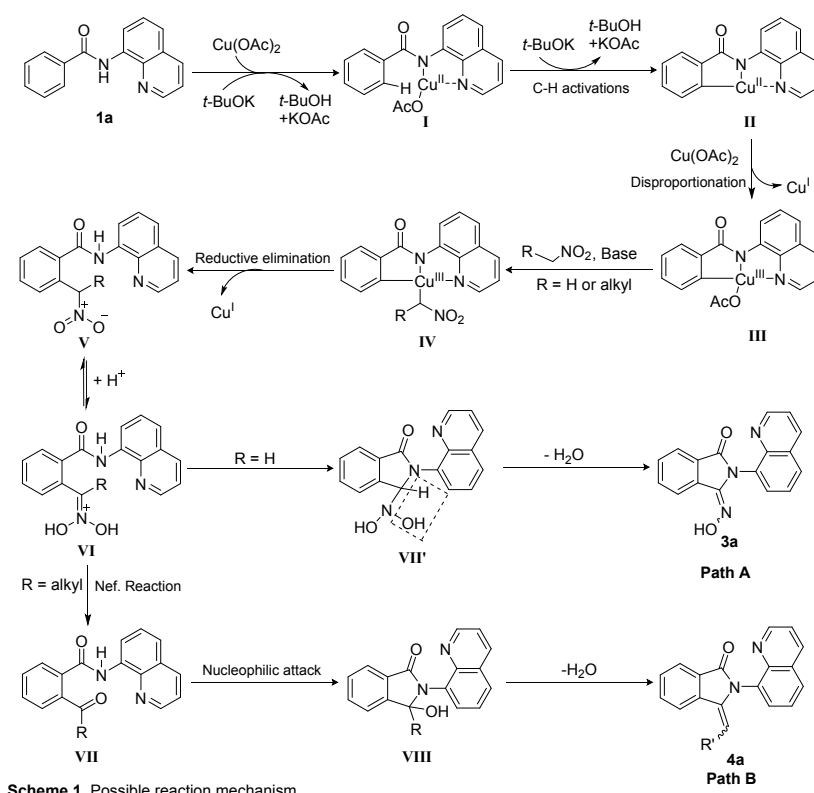

#### 4. Characterization data of products.

##### 3-methylene-2-(quinolin-8-yl)isoindolin-1-one (**4a**):

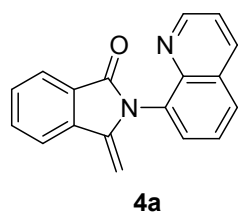

Following the general procedure the title compound was isolated by flash chromatography (eluent: ethyl acetate/petrol ether =1/2) as a white solid in 82 % yield, mp 183-184 °C. <sup>1</sup>H NMR (400 MHz, CDCl<sub>3</sub>): δ 8.89 (d, *J* = 3.6 Hz, 1H), 8.23 (d, *J* = 8.4 Hz, 1H), 7.97 (t, *J* = 8.6 Hz, 2H), 7.81-7.76 (m, 2H), 7.69-7.63 (m, 2H), 7.57 (t, *J* = 7.4 Hz, 1H), 7.43 (dd, *J* = 8.4, 4.0 Hz, 1H), 5.19 (s, 1H), 4.41 (s, 1H); <sup>13</sup>C NMR (100 MHz, CDCl<sub>3</sub>): δ 167.4, 151.1, 144.7, 144.0, 136.7, 136.2, 132.5, 132.1, 130.9, 129.5, 129.5, 129.4, 129.3, 126.2, 123.6, 121.8, 120.2, 90.2; IR (neat, cm<sup>-1</sup>) ν 2922, 1717, 1645, 1469, 1396, 887, 824, 696, 623, 467; HRMS (ESI, *m/z*): calcd for C<sub>18</sub>H<sub>12</sub>N<sub>2</sub>O [M+H]<sup>+</sup>: 273.1028; Found: 273.1021.

**5-methyl-3-methylene-2-(quinolin-8-yl)isoindolin-1-one (4b):**

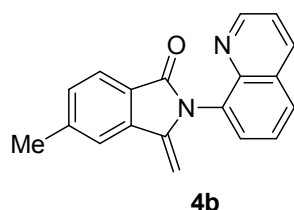

Following the general procedure the title compound was isolated by flash chromatography (eluent: ethyl acetate/petrol ether =1/2) as a yellow solid in 77 % yield, mp 185-186 °C. <sup>1</sup>H NMR (400 MHz, CDCl<sub>3</sub>): δ 8.89 (d, *J* = 3.6 Hz, 1H), 8.22 (d, *J* = 8.4 Hz, 1H), 7.94 (d, *J* = 8.4 Hz, 1H), 7.86 (d, *J* = 7.6 Hz, 1H), 7.76 (d, *J* = 7.2 Hz, 1H), 7.67 (t, *J* = 7.8 Hz, 1H), 7.59 (s, 1H), 7.43-7.37 (m, 2H), 5.14 (s, 1H), 4.36 (s, 1H), 2.52 (s, 3H); <sup>13</sup>C NMR (100 MHz, CDCl<sub>3</sub>): δ 167.6, 151.1, 144.8, 144.1, 142.8, 137.1, 136.2, 132.7, 130.9, 130.6, 129.5, 129.2, 127.0, 126.2, 123.5, 121.7, 120.6, 89.7, 22.0; IR (neat, cm<sup>-1</sup>) ν 2929, 1703, 1487, 1193, 1081, 892, 671; HRMS (ESI, *m/z*): calcd for C<sub>19</sub>H<sub>14</sub>N<sub>2</sub>O [M+H]<sup>+</sup>: 287.1184; Found: 287.1180.

**5-methoxy-3-methylene-2-(quinolin-8-yl)isoindolin-1-one (4c):**

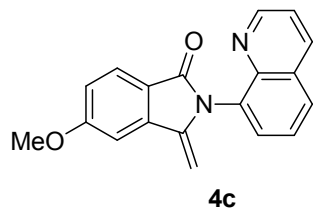

Following the general procedure the title compound was isolated by flash chromatography (eluent: ethyl acetate/petrol ether =2/3) as a yellow solid in 83 % yield, mp 179-180 °C. <sup>1</sup>H NMR (400 MHz, CDCl<sub>3</sub>): δ 8.90 (s, 1H), 8.22 (d, *J* = 8.0 Hz, 1H), 7.94 (d, *J* = 8.0 Hz, 1H), 7.87 (d, *J* = 8.4 Hz, 1H), 7.76 (d, *J* = 6.8 Hz, 1H), 7.66 (t, *J* = 7.8 Hz, 1H), 7.42 (dd, *J* = 8.4, 4.0 Hz, 1H), 7.24 (d, *J* = 1.2 Hz, 1H), 7.09 (dd, *J* = 8.4, 1.2 Hz, 1H), 5.13 (s, 1H), 4.37 (s, 1H), 3.92 (s, 3H); <sup>13</sup>C NMR (100 MHz, CDCl<sub>3</sub>): δ 167.3, 163.4, 151.0, 144.8, 144.0, 138.9, 136.2, 132.7, 130.9, 129.5, 129.2, 126.2, 125.1, 122.3, 121.7, 116.6, 104.5, 89.8, 55.7; IR (neat, cm<sup>-1</sup>) ν 3010, 1705, 1490, 1287, 1237, 1174, 1024, 906; HRMS (ESI, *m/z*): calcd for C<sub>19</sub>H<sub>14</sub>N<sub>2</sub>O<sub>2</sub> [M+H]<sup>+</sup>: 303.1134; Found: 303.1127.

**5-(tert-butyl)-3-methylene-2-(quinolin-8-yl)isoindolin-1-one (4d):**

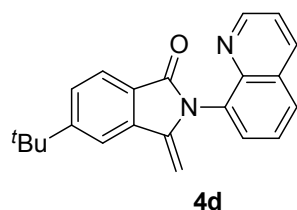

Following the general procedure the title compound was isolated by flash chromatography (eluent: ethyl acetate/petrol ether =1/2) as a white solid in 75 % yield, mp 215-216 °C. <sup>1</sup>H NMR (400 MHz, CDCl<sub>3</sub>): δ 8.89 (d, *J* = 3.6 Hz, 1H), 8.21 (d, *J* = 8.0 Hz, 1H), 7.92 (t, *J* = 9.2 Hz, 2H), 7.81 (s, 1H), 7.76 (d, *J* = 7.2 Hz, 1H), 7.68–7.62 (m, 2H), 7.41 (dd, *J* = 8.0, 4.0 Hz, 1H), 5.20 (s, 1H), 4.38 (s, 1H), 1.42 (s, 9H); <sup>13</sup>C NMR (100 MHz, CDCl<sub>3</sub>): δ 167.4, 156.0, 150.8, 144.8, 144.4, 136.7, 136.1, 132.7, 130.9, 129.4, 129.2, 127.1, 127.0, 126.2, 123.3, 121.7, 117.0, 89.5, 35.4, 31.3; IR (neat, cm<sup>-1</sup>) ν 2958, 2309, 1780, 1484, 1197, 1066, 911, 679; HRMS (ESI, m/z): calcd for C<sub>22</sub>H<sub>20</sub>N<sub>2</sub>O [M+H]<sup>+</sup>: 329.1654; Found: 329.1647.

**5-chloro-3-methylene-2-(quinolin-8-yl)isoindolin-1-one (4e):**

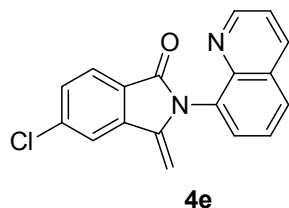

Following the general procedure the title compound was isolated by flash chromatography (eluent: ethyl acetate/petrol ether =1/2) as a yellow solid in 71 % yield, mp 248-249 °C. <sup>1</sup>H NMR (400 MHz, CDCl<sub>3</sub>): δ 8.89 (d, *J* = 2.8 Hz, 1H), 8.24 (d, *J* = 8.4 Hz, 1H), 7.97 (d, *J* = 8.0 Hz, 1H), 7.90 (d, *J* = 8.0 Hz, 1H), 7.76 (d, *J* = 6.4 Hz, 2H), 7.68 (t, *J* = 7.6 Hz, 1H), 7.55 (d, *J* = 8.0 Hz, 1H), 7.45 (dd, *J* = 8.2, 4.2 Hz, 1H), 5.18 (s, 1H), 4.45 (s, 1H); <sup>13</sup>C NMR (100 MHz, CDCl<sub>3</sub>): δ 166.5, 151.2, 144.6, 143.0, 138.6, 138.2, 136.3, 132.2, 130.8, 130.0, 129.5, 127.8, 126.2, 125.0, 121.9, 120.7, 91.4; IR (neat, cm<sup>-1</sup>) ν 3012, 1717, 1485, 1182, 1137, 1078, 882, 634, 580; HRMS (ESI, m/z): calcd for C<sub>18</sub>H<sub>11</sub>ClN<sub>2</sub>O [M+H]<sup>+</sup>: 307.0638; Found: 307.0633.

**5-ethoxy-3-methylene-2-(quinolin-8-yl)isoindolin-1-one (4f):**

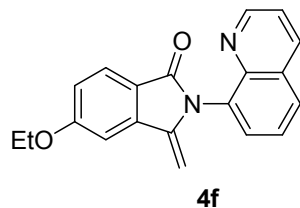

Following the general procedure the title compound was isolated by flash chromatography (eluent: ethyl acetate/petrol ether =2/3) as a white solid in 81 % yield,

mp 203-204 °C. <sup>1</sup>H NMR (400 MHz, CDCl<sub>3</sub>) δ 8.88 (d, *J* = 3.2 Hz, 1H), 8.21 (d, *J* = 8.4 Hz, 1H), 7.92 (d, *J* = 8.0 Hz, 1H), 7.86 (d, *J* = 8.4 Hz, 1H), 7.75 (d, *J* = 7.2 Hz, 1H), 7.65 (t, *J* = 7.6 Hz, 1H), 7.40 (dd, *J* = 8.0, 4.0 Hz, 1H), 7.23 (s, 1H), 7.07 (d, *J* = 8.4 Hz, 1H), 5.11 (s, 1H), 4.35 (s, 1H), 4.14 (q, *J* = 13.6, 6.8 Hz, 2H), 1.47 (t, *J* = 6.8 Hz, 3H); <sup>13</sup>C NMR (100 MHz, CDCl<sub>3</sub>) δ 167.3, 162.7, 151.0, 144.8, 144.0, 138.8, 136.2, 132.7, 130.9, 129.4, 129.1, 126.2, 125.1, 122.0, 121.7, 116.9, 105.0, 89.7, 64.0, 14.6; IR (neat, cm<sup>-1</sup>) ν 2922, 1715, 1649, 1482, 1294, 1183, 884, 629; HRMS (ESI, *m/z*): calcd for C<sub>20</sub>H<sub>16</sub>N<sub>2</sub>O<sub>2</sub> [M+H]<sup>+</sup>: 317.1290; Found: 317.1287.

**6-trifluoromethyl-3-methylene-2-(quinolin-8-yl)isoindolin-1-one (4g):**

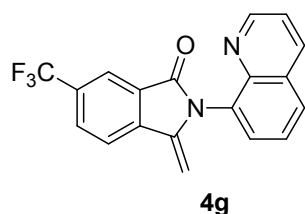

Following the general procedure the title compound was isolated by flash chromatography (eluent: ethyl acetate/petrol ether =1/3) as a white solid in 59 % yield, mp 210-211 °C. <sup>1</sup>H NMR (400 MHz, CDCl<sub>3</sub>): δ 8.88 (d, *J* = 2.0 Hz, 1H), 8.24-8.25 (m, 2H), 7.98 (d, *J* = 8.0 Hz, 1H), 7.90 (s, 2H), 7.78 (d, *J* = 7.2, 1H), 7.69 (t, *J* = 7.8 Hz, 1H), 7.45 (dd, *J* = 8.4, 4.0 Hz, 1H), 5.30 (s, 1H), 4.53 (s, 1H); <sup>13</sup>C NMR (100 MHz, CDCl<sub>3</sub>): δ 166.1, 151.2, 144.4, 143.0, 139.5, 136.4, 131.9, 131.9 (q, *J*<sub>C-F</sub> = 32.8 Hz), 131.9, 130.8, 129.9, 129.6, 129.5, 129.0 (q, *J*<sub>C-F</sub> = 3.5 Hz), 126.3, 123.7 (q, *J*<sub>C-F</sub> = 271 Hz), 122.0, 121.1 (q, *J*<sub>C-F</sub> = 3.9 Hz), 120.9, 92.7; <sup>19</sup>F NMR (377 MHz, CDCl<sub>3</sub>) δ -62.3; IR (neat, cm<sup>-1</sup>) ν 2932, 1717, 1645, 1500, 1400, 1326, 1270, 1174, 1128, 841, 797; HRMS (ESI, *m/z*): calcd for C<sub>19</sub>H<sub>11</sub>F<sub>3</sub>N<sub>2</sub>O [M+H]<sup>+</sup>: 341.0902; Found: 341.0893.

**6-methyl-3-methylene-2-(quinolin-8-yl)isoindolin-1-one (4h):**

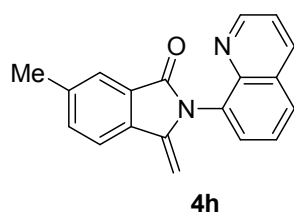

Following the general procedure the title compound was isolated by flash chromatography (eluent: ethyl acetate/petrol ether =1/2) as a white solid in 72 % yield, mp 145-146 °C. <sup>1</sup>H NMR (400 MHz, CDCl<sub>3</sub>): δ 8.90 (d, *J* = 2.0 Hz, 1H), 8.24 (d, *J* = 8.0 Hz, 1H), 7.96 (d, *J* = 8.0 Hz, 1H), 7.77 (d, *J* = 8.0 Hz, 2H), 7.69-7.67 (m, 2H), 7.47 - 7.42 (m, 2H), 5.12 (s, 1H), 4.36 (s, 1H), 2.51 (s, 3H); <sup>13</sup>C NMR (100 MHz, CDCl<sub>3</sub>): δ 167.6, 151.1, 144.8, 144.1, 140.0, 136.3, 134.3, 133.1, 132.7, 130.9, 129.7, 129.5, 129.2, 126.3, 123.9, 121.8, 120.1, 89.5, 21.6; IR (neat, cm<sup>-1</sup>) ν 2973, 1714, 1644, 1487, 1260, 1182, 1136, 1076, 916, 631; HRMS (ESI, *m/z*): calcd for C<sub>19</sub>H<sub>14</sub>N<sub>2</sub>O [M+H]<sup>+</sup>: 287.1184; Found: 287.1179.

### 6-chloro-3-methylene-2-(quinolin-8-yl)isoindolin-1-one (4i)

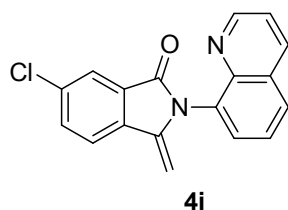

Following the general procedure the title compound was isolated by flash chromatography (eluent: ethyl acetate/petrol ether =1/2) as a yellow solid in 70 % yield, mp 173-174 °C. <sup>1</sup>H NMR (400 MHz, CDCl<sub>3</sub>): δ 8.90 (d, *J* = 3.6 Hz, 1H), 8.25 (d, *J* = 8.0 Hz, 1H), 7.99 – 7.95 (m, 2H), 7.78 -7.69 (m, 3H), 7.62 (d, *J* = 8.0 Hz, 1H), 7.45 (dd, *J* = 8.2, 4.0 Hz, 1H), 5.18 (s, 1H), 4.45 (s, 1H); <sup>13</sup>C NMR (100 MHz, CDCl<sub>3</sub>): δ 166.1, 151.2, 144.6, 143.2, 136.4, 135.8, 134.9, 132.3, 132.2, 131.0, 130.8, 129.5, 126.3, 123.8, 121.9, 121.6, 91.2; IR (neat, cm<sup>-1</sup>) ν 3075, 1715, 1640, 1572, 1475, 1397, 1336, 1181, 1137; HRMS (ESI, m/z): calcd for C<sub>18</sub>H<sub>11</sub>ClN<sub>2</sub>O [M+H]<sup>+</sup>: 307.0638; Found: 307.0631.

### 6-methoxy-3-methylene-2-(quinolin-8-yl)isoindolin-1-one (4j):

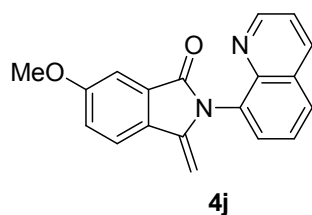

Following the general procedure the title compound was isolated by flash chromatography (eluent: ethyl acetate/petrol ether =1/2) as a white solid in 68 % yield, mp 210-211 °C. <sup>1</sup>H NMR (400 MHz, CDCl<sub>3</sub>): δ 8.91 (d, *J* = 4.0 Hz, 1H), 8.24 (d, *J* = 8.0 Hz, 1H), 7.96 (d, *J* = 8.0 Hz, 1H), 7.77 (d, *J* = 7.2 Hz, 1H), 7.70 – 7.66 (m, 2H), 7.45 - 7.42 (m, 2H), 7.21 (d, *J* = 8.4, 1H), 5.06 (s, 1H), 4.33 (s, 1H), 3.92 (s, 3H); <sup>13</sup>C NMR (100 MHz, CDCl<sub>3</sub>): δ 167.4, 161.3, 151.2, 144.8, 143.9, 136.3, 132.7, 131.1, 130.9, 129.6, 129.5, 129.3, 126.2, 121.8, 121.6, 120.7, 106.1, 89.1, 55.8; IR (neat, cm<sup>-1</sup>) ν 3089, 1713, 1492, 1285, 1186, 1130, 1072, 923, 736; HRMS (ESI, m/z): calcd for C<sub>19</sub>H<sub>14</sub>N<sub>2</sub>O<sub>2</sub> [M+H]<sup>+</sup>: 303.1134; Found: 303.1125.

### 3-methylene-2-(quinolin-8-yl)-7-(trifluoromethyl)isoindolin-1-one (4k):

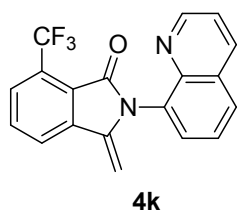

Following the general procedure the title compound was isolated by flash chromatography (eluent: ethyl acetate/petrol ether =1/2) as a white solid in 53 % yield, mp 185-186 °C. <sup>1</sup>H NMR (400 MHz, CDCl<sub>3</sub>): δ 8.89 (d, *J* = 3.9 Hz, 1H), 8.24 (d, *J* =

8.3 Hz, 1H), 7.99 (dd,  $J = 14.1, 8.0$  Hz, 2H), 7.86 (d,  $J = 7.6$  Hz, 1H), 7.77 (dd,  $J = 11.3, 7.7$  Hz, 2H), 7.68 (t,  $J = 7.8$  Hz, 1H), 7.44 (dd,  $J = 8.1, 4.0$  Hz, 1H), 5.25 (s, 1H), 4.49 (s, 1H);  $^{13}\text{C}$  NMR (100 MHz,  $\text{CDCl}_3$ )  $\delta$  163.9, 151.2, 149.6, 144.6, 142.7, 138.6, 136.3, 132.1, 131.8, 131.0, 129.5, 129.5, 127.0 (q,  $J_{\text{C-F}} = 24.9$  Hz), 126.9, 123.9, 121.9, 91.4;  $^{19}\text{F}$  NMR (377 MHz,  $\text{CDCl}_3$ )  $\delta$  -60.3; IR (neat,  $\text{cm}^{-1}$ )  $\nu$  3075, 1719, 1494, 1388, 1325, 1185, 1136, 1069, 921, 689; HRMS (ESI,  $m/z$ ): calcd for  $\text{C}_{19}\text{H}_{11}\text{F}_3\text{N}_2\text{O}$   $[\text{M}+\text{H}]^+$ : 341.0902; Found: 341.0899.

#### 7-fluoro-3-methylene-2-(quinolin-8-yl)isoindolin-1-one (4l):

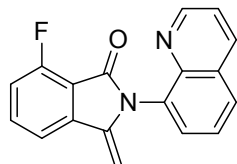

4l

Following the general procedure the title compound was isolated by flash chromatography (eluent: ethyl acetate/petrol ether =1/2) as a white solid in 59 % yield, mp 193-194 °C.  $^1\text{H}$  NMR (400 MHz,  $\text{CDCl}_3$ ):  $\delta$  8.89 (s, 1H), 8.24 (d,  $J = 8.4$  Hz, 1H), 7.96 (d,  $J = 8.0$  Hz, 1H), 7.76 (d,  $J = 7.2$  Hz, 1H), 7.69 - 7.57 (m, 3H), 7.44 (dd,  $J = 7.6, 3.6$  Hz, 1H), 7.20 (t,  $J = 8.2$  Hz, 1H), 5.21 (s, 1H), 4.43 (s, 1H);  $^{13}\text{C}$  NMR (100 MHz,  $\text{CDCl}_3$ )  $\delta$  164.2 (d,  $J_{\text{C-F}} = 1.9$  Hz), 158.8 (d,  $J_{\text{C-F}} = 259$  Hz), 151.2, 144.6, 143.2 (d,  $J_{\text{C-F}} = 1.8$  Hz), 139.2 (d,  $J_{\text{C-F}} = 3.2$  Hz), 136.3, 134.1, 134.0, 132.1, 130.9, 129.5, 126.2, 121.8, 116.8 (d,  $J_{\text{C-F}} = 19.3$  Hz), 116.5 (d,  $J_{\text{C-F}} = 13.4$  Hz), 116.30 (d,  $J_{\text{C-F}} = 4.1$  Hz), 91.4;  $^{19}\text{F}$  NMR (377 MHz,  $\text{CDCl}_3$ )  $\delta$  -116.8; IR (neat,  $\text{cm}^{-1}$ )  $\nu$  3075, 1718, 1487, 1256, 1186, 1137, 1081, 928, 807, 722, 632; HRMS (ESI,  $m/z$ ): calcd for  $\text{C}_{18}\text{H}_{11}\text{FN}_2\text{O}$   $[\text{M}+\text{H}]^+$ : 291.0934; Found: 291.0931.

#### 3-methylene-2-(quinolin-8-yl)-2,3-dihydro-1H-benzo[f]isoindol-1-one (4m):

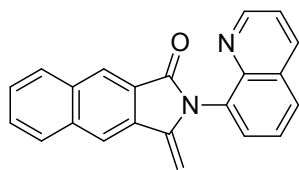

4m

Following the general procedure the title compound was isolated by flash chromatography (eluent: ethyl acetate/petrol ether =1/2) as a white solid in 82 % yield, mp 201-202 °C.  $^1\text{H}$  NMR (400 MHz,  $\text{CDCl}_3$ )  $\delta$  8.90 (br, 1H), 8.51 (s, 1H), 8.23 (d,  $J = 7.2$  Hz, 2H), 8.06 (d,  $J = 8.0$  Hz, 1H), 8.00 - 7.95 (m, 2H), 7.82 (d,  $J = 7.2$  Hz, 1H), 7.70 (t,  $J = 7.6$  Hz, 1H), 7.64 - 7.56 (m, 2H), 7.43 (dd,  $J = 8.0, 4.0$  Hz, 1H), 5.27 (s, 1H), 4.38 (s, 1H);  $^{13}\text{C}$  NMR (100 MHz,  $\text{CDCl}_3$ )  $\delta$  167.3, 151.1, 144.6, 144.0, 136.2, 135.4, 133.7, 132.8, 132.5, 130.8, 129.8, 129.5, 129.4, 128.7, 127.9, 127.3, 126.8, 126.2, 124.3, 121.8, 119.5, 88.5; IR (neat,  $\text{cm}^{-1}$ )  $\nu$  3108, 1715, 1485, 1192, 1134, 1072, 912, 839, 684; HRMS (ESI,  $m/z$ ): calcd for  $\text{C}_{22}\text{H}_{14}\text{N}_2\text{O}$   $[\text{M}+\text{H}]^+$ : 323.1184; Found: 323.1181.

**3-methylene-2-(quinolin-8-yl)-2,3-dihydro-1H-pyrrolo[3,4-c]pyridin-1-one (4n):**

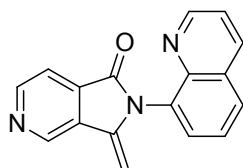

**4n**

Following the general procedure the title compound was isolated by flash chromatography (eluent: ethyl acetate/petrol ether =1/1) as a white solid in 48 % yield, mp 198-199 °C. <sup>1</sup>H NMR (400 MHz, CDCl<sub>3</sub>) δ 9.20 (s, 1H), 8.89 (s, 2H), 8.26 (d, *J* = 8.4 Hz, 1H), 8.00 (d, *J* = 8.0 Hz, 1H), 7.87 (d, *J* = 3.6 Hz, 1H), 7.78-7.68 (m, 2H), 7.46 (dd, *J* = 8.4, 4.0 Hz, 1H), 5.34 (s, 1H), 4.57 (s, 1H); <sup>13</sup>C NMR (100 MHz, CDCl<sub>3</sub>) δ 165.8, 151.3, 151.0, 150.3, 143.0, 142.0, 136.3, 136.2, 131.8, 130.7, 130.1, 130.0, 129.8, 126.3, 122.1, 122.0, 92.9; IR (neat, cm<sup>-1</sup>) ν 3065, 1718, 1526, 1487, 1186, 1132, 1072, 933, 836, 685; HRMS (ESI, *m/z*): calcd for C<sub>17</sub>H<sub>11</sub>N<sub>3</sub>O [M+H]<sup>+</sup>: 274.0980; Found: 274.0977.

**7-methyl-3-methylene-2-(quinolin-8-yl)isoindolin-1-one (4p):**

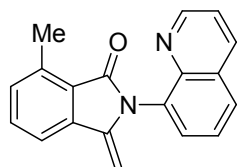

**4p**

Following the general procedure the title compound was isolated by flash chromatography (eluent: ethyl acetate/petrol ether =1/2) as a yellow solid in 45 % yield, mp 191-192 °C. <sup>1</sup>H NMR (400 MHz, CDCl<sub>3</sub>): δ 8.92 (d, *J* = 1.2 Hz, 1H), 8.24 (d, *J* = 8.4 Hz, 1H), 7.96 (d, *J* = 8.0 Hz, 1H), 7.76 (d, *J* = 7.2 Hz, 1H), 7.68 (t, *J* = 7.7 Hz, 1H), 7.62 (d, *J* = 7.6 Hz, 1H), 7.51 (t, *J* = 7.6 Hz, 1H), 7.44 (dd, *J* = 8.0, 4.0 Hz, 1H), 7.31 (d, *J* = 7.6 Hz, 1H), 5.14 (s, 1H), 4.35 (s, 1H), 2.77 (s, 3H); <sup>13</sup>C NMR (100 MHz, CDCl<sub>3</sub>): δ 168.2, 151.2, 144.9, 143.9, 137.8, 137.2, 136.2, 132.7, 131.7, 131.6, 131.0, 129.5, 129.2, 126.6, 126.2, 121.7, 117.7, 89.3, 17.5; IR (neat, cm<sup>-1</sup>) ν 3009, 1713, 1652, 1490, 1399, 1331, 1282, 1181, 1133, 1070; HRMS (ESI, *m/z*): calcd for C<sub>19</sub>H<sub>14</sub>N<sub>2</sub>O [M+H]<sup>+</sup>: 287.1184; Found: 287.1179.

**5,7-dimethyl-3-methylene-2-(quinolin-8-yl)isoindolin-1-one (4q):**

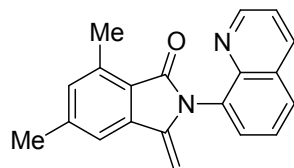

**4q**

Following the general procedure the title compound was isolated by flash chromatography (eluent: ethyl acetate/petrol ether =1/2) as a white solid in 42 % yield,



mp 174-175 °C. <sup>1</sup>H NMR (400 MHz, CDCl<sub>3</sub>) δ 8.90 (d, *J* = 3.6 Hz, 1H), 8.22 (d, *J* = 8.4 Hz, 1H), 7.93 (d, *J* = 8.0 Hz, 1H), 7.75 (d, *J* = 7.2 Hz, 1H), 7.66 (t, *J* = 7.8 Hz, 1H), 7.43 - 7.40 (m, 2H), 7.13 (s, 1H), 5.09 (s, 1H), 4.30 (s, 1H), 2.72 (s, 3H), 2.46 (s, 3H); <sup>13</sup>C NMR (100 MHz, CDCl<sub>3</sub>) δ 168.2, 151.1, 145.0, 144.0, 142.3, 137.6, 137.5, 136.2, 132.9, 132.6, 131.0, 129.4, 129.1, 126.2, 124.3, 121.7, 118.2, 88.8, 21.8, 17.3; IR (neat, cm<sup>-1</sup>) ν 2953, 1713, 1487, 1186, 1130, 1069, 911, 753; HRMS (ESI, *m/z*): calcd for C<sub>20</sub>H<sub>16</sub>N<sub>2</sub>O [M+H]<sup>+</sup>: 301.1341; Found: 301.1342.

### 3-ethylidene-2-(quinolin-8-yl)isoindolin-1-one (5a)

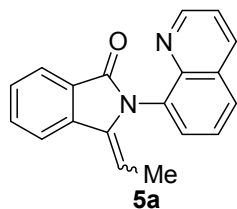

Following the general procedure the title compound was isolated by flash chromatography (eluent: ethyl acetate/petrol ether =1/1) as a white solid in 72 % yield; Approx. 1.2:1 mixture of *E* and *Z* isomers; <sup>1</sup>H NMR (400 MHz, CDCl<sub>3</sub>): *Z* isomer: δ 8.92 (d, *J* = 4.1 Hz, 1H), 8.23 (d, *J* = 8.3 Hz, 1H), 7.94 (t, *J* = 7.2 Hz, 2H), 7.81 (d, *J* = 7.2 Hz, 1H), 7.71 (d, *J* = 7.7 Hz, 1H), 7.66 (t, *J* = 7.8 Hz, 1H), 7.61 (t, *J* = 7.5 Hz, 1H), 7.49 (t, *J* = 7.4 Hz, 1H), 7.44 (dd, *J* = 8.3, 4.1 Hz, 1H), 5.73 (q, *J* = 7.7 Hz, 1H), 1.04 (d, *J* = 7.7 Hz, 3H); *E* isomer: δ 8.90 (d, *J* = 3.7 Hz, 1H), 8.23 (d, *J* = 8.3 Hz, 1H), 8.02 (d, *J* = 7.5 Hz, 1H), 7.97-7.94 (m, 2H), 7.73 (d, *J* = 7.0 Hz, 1H), 7.66 (t, *J* = 7.8 Hz, 2H), 7.55 (t, *J* = 7.5 Hz, 1H), 7.42 (dd, *J* = 8.2, 4.1 Hz, 1H), 5.05 (q, *J* = 7.6 Hz, 1H), 2.11 (d, *J* = 7.7 Hz, 3H); <sup>13</sup>C NMR (100 MHz, CDCl<sub>3</sub>) *Z* isomer: δ 168.3, 151.2, 145.5, 138.3, 136.2, 136.2, 135.2, 131.9, 130.7, 129.1, 128.3, 128.1, 126.2, 126.0, 123.6, 121.7, 119.1, 103.3, 11.4; *E* isomer: δ 166.7, 151.2, 145.0, 138.4, 136.3, 136.0, 132.9, 131.9, 131.4, 130.5, 129.5, 129.2, 128.6, 126.3, 123.9, 123.5, 121.7, 107.6, 12.9; IR (neat, cm<sup>-1</sup>) *E* isomer: ν 3075, 1717, 1490, 1127, 1064, 928, 672. *Z* isomer: ν 3071, 1713, 1490, 1126, 1133, 1072, 932, 678; HRMS (ESI, *m/z*): calcd for C<sub>19</sub>H<sub>14</sub>N<sub>2</sub>O [M+H]<sup>+</sup>: 287.1184; Found: 287.1181.

### 3-ethylidene-6-methoxy-2-(quinolin-8-yl)isoindolin-1-one (5b)

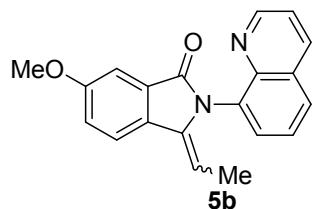

Following the general procedure the title compound was isolated by flash chromatography (eluent: ethyl acetate/petrol ether =1/1) as a white solid in 75 % yield; Approx. 1:1 mixture of *E* and *Z* isomers; <sup>1</sup>H NMR (400 MHz, CDCl<sub>3</sub>): *Z* isomer: δ 8.92 (d, *J* = 3.8 Hz, 1H), 8.23 (d, *J* = 8.2 Hz, 1H), 7.94 (d, *J* = 8.2 Hz, 1H), 7.80 (d, *J* = 7.2 Hz, 1H), 7.66 (t, *J* = 7.7 Hz, 1H), 7.59 (d, *J* = 8.5 Hz, 1H), 7.43 (dd, *J* = 8.2, 4.0

Hz, 1H), 7.39 (s, 1H), 7.17 (d,  $J = 8.5$  Hz, 1H), 5.59 (q,  $J = 7.6$  Hz, 1H), 3.89 (s, 3H), 1.01 (d,  $J = 7.7$  Hz, 3H); *E* isomer:  $\delta$  8.90 (d,  $J = 4.0$  Hz, 1H), 8.23 (d,  $J = 8.2$  Hz, 1H), 7.94 (d,  $J = 8.0$  Hz, 1H), 7.85 (d,  $J = 8.6$  Hz, 1H), 7.72 (d,  $J = 7.2$  Hz, 1H), 7.66 (t,  $J = 7.7$  Hz, 1H), 7.50 (s, 1H), 7.42 (dd,  $J = 8.1, 4.1$  Hz, 1H), 7.21 (d,  $J = 8.5$  Hz, 1H), 4.94 (q,  $J = 7.6$  Hz, 1H), 3.92 (s, 3H), 2.07 (d,  $J = 7.6$  Hz, 3H);  $^{13}\text{C}$  NMR (100 MHz,  $\text{CDCl}_3$ ): *Z* isomer:  $\delta$  168.3, 160.4, 151.2, 145.5, 136.2, 136.0, 135.3, 131.4, 130.7, 129.5, 129.1, 129.1, 126.2, 121.7, 120.8, 120.4, 105.6, 102.0, 55.8, 11.4; *E* isomer:  $\delta$  166.7, 160.3, 151.2, 145.0, 138.1, 136.3, 133.0, 132.1, 131.3, 129.5, 129.2, 129.0, 126.2, 124.6, 121.7, 120.2, 106.5, 105.9, 55.7, 12.8; IR (neat,  $\text{cm}^{-1}$ ) *E* isomer:  $\nu$  3007, 1715, 1487, 1280, 1186, 1133, 1072, 911, 678. *Z* isomer:  $\nu$  3104, 1708, 1487, 1356, 1278, 1183, 1130, 1074, 921, 678; HRMS (ESI,  $m/z$ ): calcd for  $\text{C}_{20}\text{H}_{16}\text{N}_2\text{O}_2$   $[\text{M}+\text{H}]^+$ : 317.1290; Found: 317.1285.

### 3-propylidene-2-(quinolin-8-yl)isoindolin-1-one (5c)

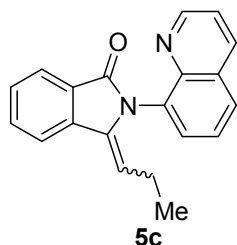

Following the general procedure the title compound was isolated by flash chromatography (eluent: ethyl acetate/petrol ether = 1/1) as a white solid in 61 % yield; Approx. 1.1:1 mixture of *E* and *Z* isomers;  $^1\text{H}$  NMR (400 MHz,  $\text{CDCl}_3$ ): *Z* isomer:  $\delta$  8.91 (d,  $J = 4.0$  Hz, 1H), 8.23 (d,  $J = 8.2$  Hz, 1H), 7.94 (t,  $J = 7.4$  Hz, 2H), 7.80 (d,  $J = 7.3$  Hz, 1H), 7.74 (d,  $J = 7.7$  Hz, 1H), 7.68 – 7.59 (m, 2H), 7.49 (t,  $J = 7.4$  Hz, 1H), 7.43 (dd,  $J = 8.2, 4.1$  Hz, 1H), 5.60 (t,  $J = 7.6$  Hz, 1H), 1.45 (m, 1H), 1.21 (m, 7.7 Hz, 1H), 0.63 (t,  $J = 7.5$  Hz, 3H); *E* isomer:  $\delta$  8.90 (d,  $J = 3.2$  Hz, 1H), 8.24 (d,  $J = 8.3$  Hz, 1H), 8.01 (d,  $J = 7.5$  Hz, 1H), 7.94 (dd,  $J = 13.4, 7.9$  Hz, 2H), 7.74-7.64 (m, 3H), 7.55 (t,  $J = 7.5$  Hz, 1H), 7.43 (dd,  $J = 8.2, 4.1$  Hz, 1H), 4.96 (t,  $J = 7.6$  Hz, 1H), 2.69-2.54 (m, 7.7 Hz, 2H), 1.05 (t,  $J = 7.5$  Hz, 3H);  $^{13}\text{C}$  NMR (100 MHz,  $\text{CDCl}_3$ ): *Z* isomer:  $\delta$  168.3, 151.2, 145.4, 138.5, 136.2, 135.3, 134.9, 131.9, 130.6, 129.1, 128.3, 128.2, 126.2, 123.6, 121.8, 119.2, 111.0, 19.1, 14.2; *E* isomer:  $\delta$  166.8, 151.2, 145.0, 137.2, 136.3, 135.9, 132.9, 131.9, 131.4, 130.5, 129.5, 129.2, 128.6, 126.3, 123.9, 123.5, 121.7, 115.4, 20.7, 14.3; IR (neat,  $\text{cm}^{-1}$ ) *E* isomer:  $\nu$  3057, 1719, 1483, 1188, 1130, 1070, 918, 676. *Z* isomer:  $\nu$  3002, 1718, 1485, 1186, 1130, 1069, 921, 678; HRMS (ESI,  $m/z$ ): calcd for  $\text{C}_{20}\text{H}_{16}\text{N}_2\text{O}$   $[\text{M}+\text{H}]^+$ : 301.1341; Found: 301.1337.

### 3-propylidene-2-(quinolin-8-yl)-2,3-dihydro-1H-benzo[f]isoindol-1-one (5d)

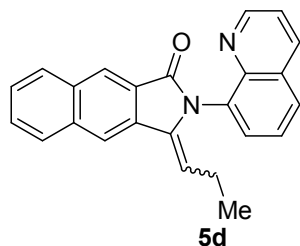

Following the general procedure the title compound was isolated by flash chromatography (eluent: ethyl acetate/petrol ether =1/1) as a white solid in 53 % yield; Approx. 1.5:1 mixture of E and Z isomers;  $^1\text{H}$  NMR (400 MHz,  $\text{CDCl}_3$ ): Z isomer:  $\delta$  8.90 (s, 1H), 8.48 (s, 1H), 8.25 (d,  $J = 8.0$  Hz, 1H), 8.18 (s, 1H), 8.05-8.97 (m, 3H), 7.85 (d,  $J = 7.0$  Hz, 1H), 7.68 (t,  $J = 7.8$  Hz, 1H), 7.62-7.53 (m, 2H), 7.44 (dd,  $J = 7.5$ , 3.3 Hz, 1H), 5.71 (t,  $J = 7.5$  Hz, 1H), 1.52 – 1.43 (m, 1H), 1.21-1.09 (m, 1H), 0.65 (t,  $J = 7.4$  Hz, 3H); E isomer:  $\delta$  8.90 (s, 1H), 8.54 (s, 1H), 8.34 (s, 1H), 8.25 (d,  $J = 8.1$  Hz, 1H), 8.07 – 7.97 (m, 3H), 7.79 (d,  $J = 7.2$  Hz, 1H), 7.71 (t,  $J = 7.7$  Hz, 1H), 7.65 – 7.57 (m, 2H), 7.45 – 7.43 (m, 1H), 4.94 (t,  $J = 7.3$  Hz, 1H), 2.82 – 2.67 (m, 2H), 1.11 (t,  $J = 7.4$  Hz, 3H);  $^{13}\text{C}$  NMR (100 MHz,  $\text{CDCl}_3$ ): Z isomer:  $\delta$  168.3, 151.2, 136.2, 135.6, 134.7, 133.2, 130.5, 129.8, 129.2, 128.5, 127.7, 126.3, 126.2, 124.2, 121.8, 118.0, 109.2, 19.1, 14.3; E isomer:  $\delta$  166.8, 151.2, 137.1, 136.3, 135.5, 133.0, 132.0, 131.3, 129.6, 129.3, 129.0, 127.8, 126.8, 126.3, 124.3, 123.1, 121.8, 113.8, 20.9, 14.4; IR (neat,  $\text{cm}^{-1}$ ) E isomer:  $\nu$  3090, 1752, 1487, 1186, 1130, 1069, 919, 673. Z isomer:  $\nu$  3002, 1718, 1490, 1189, 1130, 1074, 914, 676; HRMS (ESI,  $m/z$ ): calcd for  $\text{C}_{24}\text{H}_{18}\text{N}_2\text{O}$   $[\text{M}+\text{H}]^+$ : 351.1497; Found: 351.1495.

### 3-(2-methylpropylidene)-2-(quinolin-8-yl)isoindolin-1-one (5e)

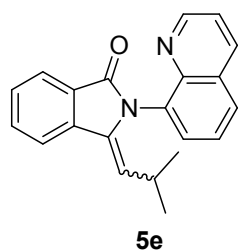

Following the general procedure the title compound was isolated by flash chromatography (eluent: ethyl acetate/petrol ether =1/1) as a white solid in 46 % yield; Approx. 1.3:1 mixture of E and Z isomers;  $^1\text{H}$  NMR (400 MHz,  $\text{CDCl}_3$ ): Z isomer:  $\delta$  8.90 (d,  $J = 3.6$  Hz, 1H), 8.23 (d,  $J = 8.3$  Hz, 1H), 7.95 (t,  $J = 9.0$  Hz, 2H), 7.81 (d,  $J = 7.2$  Hz, 1H), 7.74 (d,  $J = 7.6$  Hz, 1H), 7.68 – 7.60 (m, 2H), 7.49 (t,  $J = 7.5$  Hz, 1H), 7.43 (dd,  $J = 8.3$ , 4.2 Hz, 1H), 5.43 (d,  $J = 10.7$  Hz, 1H), 1.63 – 1.57 (m, 1H), 0.74 (d,  $J = 6.5$  Hz, 3H), 0.38 (d,  $J = 6.5$  Hz, 3H); E isomer:  $\delta$  8.89 (d,  $J = 3.4$  Hz, 1H), 8.24 (d,  $J = 8.2$  Hz, 1H), 8.02 (d,  $J = 7.5$  Hz, 1H), 7.97-7.94 (m, 2H), 7.69 (dt,  $J = 17.5$ , 7.4 Hz, 3H), 7.55 (t,  $J = 7.4$  Hz, 1H), 7.43 (dd,  $J = 8.2$ , 4.1 Hz, 1H), 4.82 (d,  $J = 9.6$  Hz, 1H), 3.37-3.29 (m, 1H), 1.09 (d,  $J = 6.6$  Hz, 3H), 1.00 (d,  $J = 6.5$  Hz, 3H);  $^{13}\text{C}$  NMR (100 MHz,  $\text{CDCl}_3$ ): Z isomer:  $\delta$  168.4, 151.2, 145.4, 138.7, 136.2, 135.5, 134.2, 133.6, 131.8, 130.5, 129.2, 128.3, 126.2, 123.6, 121.8, 119.2, 116.6, 25.1, 23.2, 22.8; E

isomer:  $\delta$  166.7, 151.0, 145.0, 136.2, 136.0, 135.8, 132.0, 131.3, 130.6, 129.5, 129.2, 128.6, 126.3, 124.0, 123.4, 121.7, 121.3, 26.6, 23.3, 23.2; IR (neat,  $\text{cm}^{-1}$ ) *E* isomer:  $\nu$  3084, 1708, 1482, 1186, 1133, 1069, 916, 676. *Z* isomer:  $\nu$  3060, 1710, 1482, 1186, 1135, 1069, 916, 678; HRMS (ESI,  $m/z$ ): calcd for  $\text{C}_{21}\text{H}_{18}\text{N}_2\text{O}$   $[\text{M}+\text{H}]^+$ : 315.1497; Found: 315.1495.

### 5-(tert-butyl)-3-(2-methylpropylidene)-2-(quinolin-8-yl)isoindolin-1-one (5f)

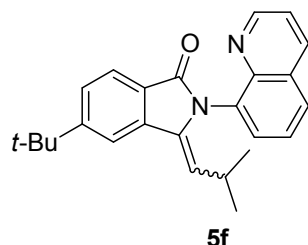

Following the general procedure the title compound was isolated by flash chromatography (eluent: ethyl acetate/petrol ether =1/1) as a white solid in 49 % yield; Approx. 1.3:1 mixture of *E* and *Z* isomers;  $^1\text{H}$  NMR (400 MHz,  $\text{CDCl}_3$ ): *Z* isomer:  $\delta$  8.90 (d,  $J = 4.0$  Hz, 1H), 8.23 (d,  $J = 8.2$  Hz, 1H), 7.95 (d,  $J = 8.2$  Hz, 1H), 7.86 (d,  $J = 8.1$  Hz, 1H), 7.79 (d,  $J = 7.2$  Hz, 1H), 7.74 (s, 1H), 7.66 (t,  $J = 7.7$  Hz, 1H), 7.55 (d,  $J = 8.1$  Hz, 1H), 7.42 (dd,  $J = 8.2, 4.1$  Hz, 1H), 5.44 (d,  $J = 10.6$  Hz, 1H), 1.62 – 1.55 (m, 1H), 1.43 (s, 9H), 0.75 (d,  $J = 6.5$  Hz, 3H), 0.39 (d,  $J = 6.5$  Hz, 3H); *E* isomer:  $\delta$  8.89 (d,  $J = 3.6$  Hz, 1H), 8.23 (d,  $J = 8.3$  Hz, 1H), 8.00 – 7.93 (m, 3H), 7.72 – 7.66 (m, 2H), 7.60 (d,  $J = 8.0$  Hz, 1H), 7.42 (dd,  $J = 8.2, 4.1$  Hz, 1H), 4.78 (d,  $J = 9.4$  Hz, 1H), 3.37-3.28 (m, 1H), 1.43 (s, 9H), 1.11 (d,  $J = 6.6$  Hz, 3H), 1.02 (d,  $J = 6.6$  Hz, 3H);  $^{13}\text{C}$  NMR (100 MHz,  $\text{CDCl}_3$ ): *Z* isomer:  $\delta$  168.4, 155.7, 151.2, 145.5, 138.6, 136.2, 135.6, 133.9, 130.5, 129.2, 129.2, 126.3, 126.1, 125.8, 123.3, 121.8, 115.8, 115.8, 35.5, 31.4, 25.1, 23.2, 22.8; *E* isomer:  $\delta$  166.8, 155.7, 151.0, 145.1, 136.5, 136.2, 135.9, 133.1, 131.4, 129.5, 129.1, 128.2, 126.3, 126.2, 123.6, 121.7, 120.7, 120.3, 35.4, 31.4, 26.8, 23.2, 23.2; IR (neat,  $\text{cm}^{-1}$ ) *E* isomer:  $\nu$  3067, 1707, 1483, 1188, 1135, 1068, 918, 674. *Z* isomer:  $\nu$  3065, 1709, 1485, 1185, 1134, 1064, 921, 677; HRMS (ESI,  $m/z$ ): calcd for  $\text{C}_{25}\text{H}_{26}\text{N}_2\text{O}$   $[\text{M}+\text{H}]^+$ : 371.2123; Found: 371.2119.

### 3-(4-octylbenzylidene)-2-(quinolin-8-yl)isoindolin-1-one (5g)

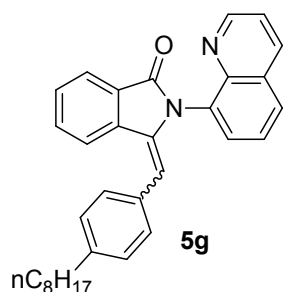

Following the general procedure the title compound was isolated by flash chromatography (eluent: ethyl acetate/petrol ether =1/1) as a white solid in 42 % yield; Approx. 1:1 mixture of *E* and *Z* isomers;  $^1\text{H}$  NMR (400 MHz,  $\text{CDCl}_3$ ): *Z* isomer:  $\delta$  8.84 (d,  $J = 4.0$  Hz, 1H), 7.97 (dd,  $J = 14.1, 7.9$  Hz, 2H), 7.88 (d,  $J = 7.7$  Hz, 1H),

7.70-7.67 (m, 1H), 7.56 (d,  $J = 7.9$  Hz, 2H), 7.48 (d,  $J = 7.3$  Hz, 1H), 7.31 (dd,  $J = 7.9$ , 3.6 Hz, 2H), 6.80 (s, 1H), 6.45 (d,  $J = 7.6$  Hz, 2H), 6.33 (d,  $J = 7.6$  Hz, 2H), 2.25 (t,  $J = 7.5$  Hz, 2H), 1.36-1.26 (m, 12H), 0.93-0.90 (m, 3H); *E* isomer:  $\delta$  8.93 (d,  $J = 3.5$  Hz, 1H), 8.25 (d,  $J = 8.1$  Hz, 1H), 8.00 – 7.97 (m, 2H), 7.85 (d,  $J = 7.2$  Hz, 1H), 7.71 (t,  $J = 7.7$  Hz, 1H), 7.59 (d,  $J = 7.8$  Hz, 1H), 7.50 (t,  $J = 7.4$  Hz, 1H), 7.46 – 7.39 (m, 2H), 7.29 (d,  $J = 7.7$  Hz, 2H), 7.16 (d,  $J = 7.7$  Hz, 2H), 6.00 (s, 1H), 2.62 (t,  $J = 7.7$  Hz, 2H), 1.31-1.27 (m, 12H), 0.89-0.86 (m, 3H);  $^{13}\text{C}$  NMR (100 MHz,  $\text{CDCl}_3$ ): *Z* isomer:  $\delta$  168.1, 150.3, 144.5, 140.8, 138.7, 135.8, 135.7, 132.1, 130.1, 128.9, 128.1, 128.0, 126.3, 125.6, 123.9, 121.1, 119.6, 107.6, 35.3, 31.9, 31.3, 29.5, 29.3, 29.1, 22.7, 14.1; *E* isomer:  $\delta$  167.0, 151.2, 145.0, 142.6, 138.5, 136.2, 135.6, 133.0, 132.4, 131.7, 131.4, 130.4, 129.6, 129.4, 129.3, 129.2, 128.5, 126.3, 123.7, 123.3, 121.8, 112.4, 35.7, 31.8, 31.3, 29.4, 29.3, 29.2, 22.6, 14.1; IR (neat,  $\text{cm}^{-1}$ ) *E* isomer:  $\nu$  3072, 1715, 1483, 1186, 1133, 1070, 920, 758, 676. *Z* isomer:  $\nu$  3060, 1709, 1484, 1187, 1134, 1069, 919, 759, 675; HRMS (ESI,  $m/z$ ): calcd for  $\text{C}_{32}\text{H}_{32}\text{N}_2\text{O}$   $[\text{M}+\text{H}]^+$ : 461.2593; Found: 461.2591.

### 3-(hydroxyimino)-2-(quinolin-8-yl)isoindolin-1-one (3a)

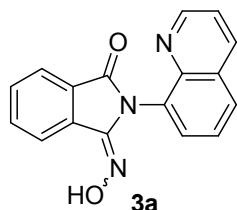

Following the general procedure the title compound was isolated by flash chromatography (eluent: ethyl acetate/petrol ether =1/1) as a white solid in 78 % yield; Approx. 4:1 mixture of *E* and *Z* isomers;  $^1\text{H}$  NMR (400 MHz,  $\text{DMSO}-d_6$ ): major product:  $\delta$  11.42 (d,  $J = 0.7$  Hz, 1H), 8.88 – 8.83 (m, 1H), 8.51 – 8.45 (m, 2H), 8.14 (d,  $J = 8.2$  Hz, 1H), 7.97 (d,  $J = 7.2$  Hz, 1H), 7.93-7.86 (m, 3H), 7.81 (d,  $J = 7.3$  Hz, 1H), 7.59 (dd,  $J = 7.9$ , 3.8 Hz, 1H); minor product:  $\delta$  10.70 (s, 1H), 8.81 (d,  $J = 3.9$  Hz, 1H), 8.45 - 8.43 (m, 1H), 8.05 (d,  $J = 8.2$  Hz, 1H), 7.79 – 7.67 (m, 6H), 7.57-7.54 (m, 1H);  $^{13}\text{C}$  NMR (100 MHz,  $\text{DMSO}-d_6$ ): major product:  $\delta$  165.9, 151.1, 149.5, 144.0, 136.6, 134.0, 132.0, 131.9, 131.2, 130.6, 129.4, 128.9, 128.4, 127.3, 126.3, 123.3, 122.2; minor product:  $\delta$  167.0, 150.7, 144.5, 141.5, 136.3, 135.3, 135.0, 133.7, 130.7, 129.3, 128.8, 128.4, 128.2, 126.1, 123.5, 121.9, 120.6; HRMS (ESI,  $m/z$ ): calcd for  $\text{C}_{17}\text{H}_{11}\text{N}_3\text{O}_2$   $[\text{M}+\text{H}]^+$ : 290.0930; Found: 290.0927.

### 3-(hydroxyimino)-5-methyl-2-(quinolin-8-yl)isoindolin-1-one (3b)

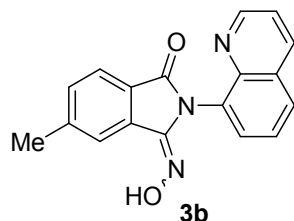

Following the general procedure the title compound was isolated by flash chromatography (eluent: ethyl acetate/petrol ether =1/1) as a white solid in 71 % yield; Approx.

3.3:1 mixture of E and Z isomers;  $^1\text{H}$  NMR (400 MHz,  $\text{DMSO-}d_6$ ): major product:  $\delta$  11.36 (s, 1H), 8.83 (d,  $J = 3.7$  Hz, 1H), 8.46 (d,  $J = 8.2$  Hz, 1H), 8.28 (s, 1H), 8.11 (d,  $J = 8.2$  Hz, 1H), 7.88 (d,  $J = 7.1$  Hz, 1H), 7.83 (d,  $J = 7.8$  Hz, 1H), 7.73 (d,  $J = 7.9$  Hz, 1H), 7.62 – 7.54 (m, 2H), 2.52 (s, 3H); minor product:  $\delta$  10.61 (s, 1H), 8.79 (d,  $J = 3.7$  Hz, 1H), 8.41 (d,  $J = 8.2$  Hz, 1H), 8.02 (d,  $J = 8.2$  Hz, 1H), 7.85 (s, 1H), 7.71-7.65 (m, 3H), 7.53-7.48 (m, 2H), 2.48 (s, 3H);  $^{13}\text{C}$  NMR (100 MHz,  $\text{DMSO-}d_6$ ): major product:  $\delta$  165.9, 151.1, 149.6, 144.4, 144.1, 136.5, 132.5, 132.1, 131.2, 129.3, 128.9, 128.9, 128.2, 127.6, 126.3, 123.2, 122.1, 21.7; minor product:  $\delta$  167.1, 150.7, 144.5, 144.3, 141.7, 136.3, 135.5, 135.4, 131.5, 129.3, 128.3, 128.2, 126.4, 126.1, 123.3, 121.9, 120.8, 21.6; HRMS (ESI, m/z): calcd for  $\text{C}_{18}\text{H}_{13}\text{N}_3\text{O}_2$   $[\text{M}+\text{H}]^+$ : 304.1086; Found: 304.1083.

### 5-chloro-3-(hydroxyimino)-2-(quinolin-8-yl)isoindolin-1-one (3c)

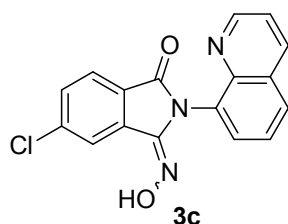

Following the general procedure the title compound was isolated by flash chromatography (eluent: ethyl acetate/petrol ether =1/1) as a white solid in 61 % yield;  $^1\text{H}$  NMR (400 MHz,  $\text{DMSO-}d_6$ ):  $\delta$  11.67 (s, 1H), 8.85 (d,  $J = 4.1$  Hz, 1H), 8.50 (d,  $J = 8.3$  Hz, 1H), 8.43 (s, 1H), 8.15 (d,  $J = 8.3$  Hz, 1H), 7.99 (d,  $J = 8.1$  Hz, 1H), 7.93-7.87 (m, 2H), 7.75 (t,  $J = 7.7$  Hz, 1H), 7.60 (dd,  $J = 8.3, 4.3$  Hz, 1H);  $^{13}\text{C}$  NMR (100 MHz,  $\text{DMSO-}d_6$ ):  $\delta$  164.9, 151.2, 148.4, 143.9, 138.5, 136.6, 132.0, 131.6, 131.1, 129.7, 129.6, 129.2, 128.9, 126.8, 126.3, 125.2, 122.2; HRMS (ESI, m/z): calcd for  $\text{C}_{17}\text{H}_{10}\text{ClN}_3\text{O}_2$   $[\text{M}+\text{H}]^+$ : 324.0540; Found: 324.0532.

### 3-(hydroxyimino)-5-methoxy-2-(quinolin-8-yl)isoindolin-1-one (3d)

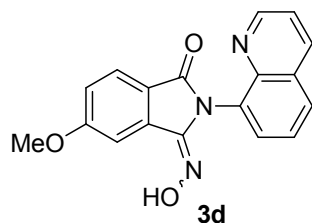

Following the general procedure the title compound was isolated by flash chromatography (eluent: ethyl acetate/petrol ether =1/1) as a white solid in 81 % yield; Approx. 1.4:1 mixture of E and Z isomers;  $^1\text{H}$  NMR (400 MHz,  $\text{DMSO-}d_6$ ): major product:  $\delta$  11.40 (s, 1H), 8.84 (d,  $J = 4.0$  Hz, 1H), 8.48 (d,  $J = 8.3$  Hz, 1H), 8.13 (d,  $J = 8.2$  Hz, 1H), 7.94 (s, 1H), 7.88 (d,  $J = 7.9$  Hz, 2H), 7.74 (t,  $J = 7.8$  Hz, 1H), 7.58 (dd,  $J = 8.5, 4.3$  Hz, 1H), 7.33 (d,  $J = 8.4$  Hz, 1H), 3.94 (s, 3H); minor product:  $\delta$  10.59 (s, 1H), 8.80 (d,  $J = 4.1$  Hz, 1H), 8.44 (d,  $J = 8.2$  Hz, 1H), 8.04 (d,  $J = 8.2$  Hz, 1H), 7.84-7.79 (m, 2H), 7.68 (t,  $J = 7.7$  Hz, 1H), 7.55 (dd,  $J = 8.4$  Hz,  $J = 4.8$  Hz, 1H), 7.32 (s, 1H), 7.24 (d,  $J = 8.4$  Hz, 1H), 3.95 (s, 3H);  $^{13}\text{C}$  NMR (100 MHz,  $\text{DMSO-}d_6$ ):  $\delta$  166.7,

165.7, 163.8, 163.8, 151.1, 150.6, 149.3, 144.6, 144.1, 141.6, 137.5, 136.5, 136.3, 135.5, 132.1, 131.2, 130.5, 129.3, 128.9, 128.3, 128.2, 126.3, 126.0, 125.2, 125.0, 123.0, 122.1, 121.9, 121.3, 118.0, 117.9, 112.0, 104.5, 56.1; HRMS (ESI, m/z): calcd for C<sub>18</sub>H<sub>13</sub>N<sub>3</sub>O<sub>3</sub> [M+H]<sup>+</sup>: 320.1035; Found: 320.1032.

### 3-(hydroxyimino)-6-methoxy-2-(quinolin-8-yl)isoindolin-1-one (3e)

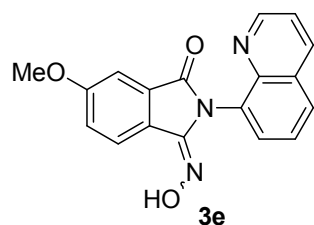

Following the general procedure the title compound was isolated by flash chromatography (eluent: ethyl acetate/petrol ether =1/1) as a white solid in 62 % yield; Approx. 5.3:1 mixture of E and Z isomers; <sup>1</sup>H NMR (400 MHz, DMSO-*d*<sub>6</sub>): major product: δ 11.20 (s, 1H), 8.85 (d, *J* = 3.9 Hz, 1H), 8.48 (d, *J* = 8.2 Hz, 1H), 8.34 (d, *J* = 8.4 Hz, 1H), 8.13 (d, *J* = 8.2 Hz, 1H), 7.90 (d, *J* = 7.1 Hz, 1H), 7.74 (t, *J* = 7.8 Hz, 1H), 7.59 (dd, *J* = 8.3, 4.2 Hz, 1H), 7.46 (d, *J* = 1.5 Hz, 1H), 7.41-7.38 (m, 1H), 3.95 (s, 3H). minor product: δ 10.50 (s, 1H), 8.81 (d, *J* = 3.9 Hz, 1H), 8.44 (d, *J* = 8.3 Hz, 1H), 8.04 (d, *J* = 8.1 Hz, 1H), 7.86 (d, *J* = 7.4 Hz, 1H), 7.78 (d, *J* = 8.4 Hz, 1H), 7.69 (t, *J* = 7.8 Hz, 1H), 7.55 (dd, *J* = 8.6 Hz, *J* = 4.2 Hz, 1H), 7.39-7.37 (m, 1H), 7.37-7.34 (m, 1H), 3.91 (s, 3H); <sup>13</sup>C NMR (100 MHz, DMSO-*d*<sub>6</sub>): major product: δ 165.8, 162.1, 151.1, 149.4, 144.1, 136.5, 132.8, 132.0, 131.2, 129.4, 128.9, 128.7, 126.3, 122.2, 121.3, 120.4, 107.3, 56.1; minor product: δ 166.9, 161.6, 150.7, 144.5, 141.3, 136.3, 135.5, 130.6, 129.3, 128.4, 128.2, 127.4, 126.1, 122.0, 121.9, 121.3, 106.7, 56.0; HRMS (ESI, m/z): calcd for C<sub>18</sub>H<sub>13</sub>N<sub>3</sub>O<sub>3</sub> [M+H]<sup>+</sup>: 320.1035; Found: 320.1033.

### 6-chloro-3-(hydroxyimino)-2-(quinolin-8-yl)isoindolin-1-one (3f)

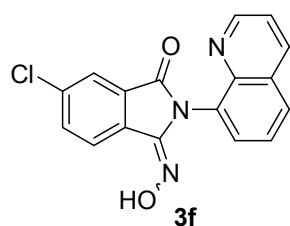

Following the general procedure the title compound was isolated by flash chromatography (eluent: ethyl acetate/petrol ether =1/1) as a white solid in 65 % yield; Approx. 5.3:1 mixture of E and Z isomers; <sup>1</sup>H NMR (400 MHz, DMSO-*d*<sub>6</sub>): major product: δ 11.61 (s, 1H), 8.85 (d, *J* = 4.0 Hz, 1H), 8.49 (d, *J* = 8.3 Hz, 1H), 8.44 (d, *J* = 8.1 Hz, 1H), 8.15 (d, *J* = 8.2 Hz, 1H), 8.02 (s, 1H), 7.95-7.90 (m, 2H), 7.75 (t, *J* = 7.7 Hz, 1H), 7.59 (dd, *J* = 8.3, 4.2 Hz, 1H); minor product: δ 10.89 (s, 1H), 8.81 (d, *J* = 3.9 Hz, 1H), 8.06 (d, *J* = 8.3 Hz, 1H), 7.99 (d, *J* = 8.4 Hz, 1H), 7.90-7.85 (m, 3H), 7.70 (t, *J* = 7.8 Hz, 1H), 7.56 (dd, *J* = 8.6, *J* = 3.8 Hz, 1H); <sup>13</sup>C NMR (100 MHz, DMSO-*d*<sub>6</sub>): major product: δ 164.7, 151.3, 148.8, 143.9, 136.7, 134.0, 132.4, 131.6, 131.2, 129.7, 128.9, 128.9, 126.9, 126.4, 123.4, 122.3; minor product: δ 165.7, 150.9, 144.4, 136.4,

135.5, 135.0, 133.8, 133.5, 132.1, 130.5, 129.3, 128.6, 128.3, 126.1, 122.6, 122.0; HRMS (ESI, m/z): calcd for C<sub>17</sub>H<sub>10</sub>ClN<sub>3</sub>O<sub>2</sub> [M+H]<sup>+</sup>: 324.0540; Found: 324.0537.

### 3-(hydroxyimino)-2-(quinolin-8-yl)-6-(trifluoromethyl)isoindolin-1-one (3g)

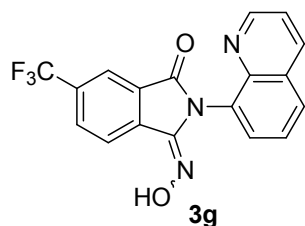

Following the general procedure the title compound was isolated by flash chromatography (eluent: ethyl acetate/petrol ether =1/1) as a white solid in 53 % yield; Approx. 5.3:1 mixture of E and Z isomers; <sup>1</sup>H NMR (400 MHz, DMSO-*d*<sub>6</sub>): major product: δ 11.82 (s, 1H), 8.85 (d, *J* = 3.7 Hz, 1H), 8.70 – 8.62 (m, 1H), 8.51 (d, *J* = 8.3 Hz, 1H), 8.28-8.15 (m, 3H), 7.95 (d, *J* = 7.2 Hz, 1H), 7.77 (t, *J* = 7.8 Hz, 1H), 7.60 (dd, *J* = 8.3, 4.0 Hz, 1H). minor product: δ 11.11 (s, 1H), 8.80 (d, *J* = 3.9 Hz, 1H), 8.46 (d, *J* = 8.3 Hz, 1H), 8.37 (d, *J* = 8.0 Hz, 1H), 8.13 – 7.99 (m, 3H), 7.91 (d, *J* = 7.3 Hz, 1H), 7.71 (t, *J* = 7.8 Hz, 1H), 7.54 (dd, *J* = 8.9, 4.1 Hz, 1H); <sup>13</sup>C NMR (100 MHz, DMSO-*d*<sub>6</sub>): δ 164.6, 151.3, 148.6, 143.8, 136.7, 131.9 (q, *J*<sub>C-F</sub> = 32.3 Hz), 131.5, 131.3, 131.2, 131.1 (q, *J*<sub>C-F</sub> = 3.5 Hz), 129.7, 128.9, 128.3, 126.4, 123.7 (q, *J*<sub>C-F</sub> = 271 Hz), 122.3, 120.3 (q, *J*<sub>C-F</sub> = 3.6 Hz); HRMS (ESI, m/z): calcd for C<sub>18</sub>H<sub>10</sub>F<sub>3</sub>N<sub>3</sub>O<sub>2</sub> [M+H]<sup>+</sup>: 358.0803; Found: 358.0800.

### 3-(hydroxyimino)-7-methyl-2-(quinolin-8-yl)isoindolin-1-one (3h)

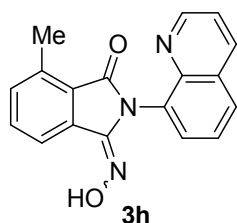

Following the general procedure the title compound was isolated by flash chromatography (eluent: ethyl acetate/petrol ether =1/1) as a white solid in 75 % yield; Approx. 2.4:1 mixture of E and Z isomers; <sup>1</sup>H NMR (400 MHz, DMSO-*d*<sub>6</sub>): major product: δ 11.32 (s, 1H), 8.86 (d, *J* = 4.0 Hz, 1H), 8.48 (d, *J* = 8.3 Hz, 1H), 8.31 (d, *J* = 7.6 Hz, 1H), 8.13 (d, *J* = 8.2 Hz, 1H), 7.89 (d, *J* = 7.2 Hz, 1H), 7.77-7.71 (m, 2H), 7.61 – 7.53 (m, 2H), 2.69 (s, 3H); minor product: δ 10.59 (s, 1H), 8.81 (d, *J* = 4.0 Hz, 1H), 8.44 (d, *J* = 8.3 Hz, 1H), 8.04 (d, *J* = 8.2 Hz, 1H), 7.86 (d, *J* = 7.2 Hz, 1H), 7.77-7.66 (m, 3H), 7.61 – 7.53 (m, 1H), 7.47 (d, *J* = 7.3 Hz, 1H), 2.63 (s, 3H); <sup>13</sup>C NMR (100 MHz, DMSO-*d*<sub>6</sub>): major product: δ 166.6, 151.1, 149.3, 144.1, 137.2, 136.6, 133.9, 133.4, 132.1, 131.3, 129.4, 128.9, 128.9, 127.4, 126.3, 125.0, 122.1, 17.2; minor product: δ 167.7, 150.7, 144.6, 141.5, 137.2, 136.3, 135.5, 135.4, 133.2, 132.4, 129.4, 128.3, 128.2, 126.1, 125.9, 121.9, 118.1, 17.1; HRMS (ESI, m/z): calcd for C<sub>18</sub>H<sub>13</sub>N<sub>3</sub>O<sub>2</sub> [M+H]<sup>+</sup>: 304.1086; Found: 304.1078.

### 3-(hydroxyimino)-2-(quinolin-8-yl)-2,3-dihydro-1H-benzo[*f*]isoindol-1-one (3i)



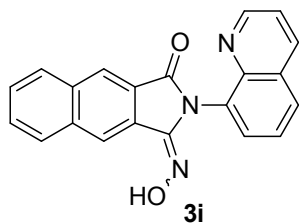

Following the general procedure the title compound was isolated by flash chromatography (eluent: ethyl acetate/petrol ether =1/1) as a white solid in 61 % yield;  $^1\text{H}$  NMR (400 MHz,  $\text{DMSO-}d_6$ ):  $\delta$  11.41 (s, 1H), 9.05 (s, 1H), 8.86 (d,  $J = 4.0$  Hz, 1H), 8.62 (s, 1H), 8.50 (d,  $J = 8.3$  Hz, 1H), 8.29 (d,  $J = 5.9$  Hz, 2H), 8.16 (d,  $J = 8.3$  Hz, 1H), 7.97 (d,  $J = 7.2$  Hz, 1H), 7.80-7.75 (m, 3H), 7.60 (dd,  $J = 8.3, 4.2$  Hz, 1H);  $^{13}\text{C}$  NMR (100 MHz,  $\text{DMSO-}d_6$ ):  $\delta$  165.8, 162.6, 151.2, 149.5, 143.9, 136.6, 135.5, 133.8, 132.2, 131.1, 130.0, 129.9, 129.5, 128.9, 128.8, 128.4, 127.9, 127.7, 126.4, 124.3, 122.2; HRMS (ESI,  $m/z$ ): calcd for  $\text{C}_{21}\text{H}_{13}\text{N}_3\text{O}_2$   $[\text{M}+\text{H}]^+$ : 340.1086; Found: 340.1081.

### 3-hydroxy-3,7-dimethyl-2-(quinolin-8-yl)isoindolin-1-one (4p')

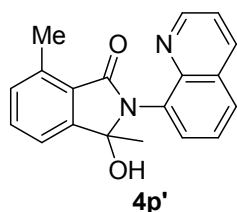

Following the general procedure the title compound was isolated by flash chromatography (eluent: ethyl acetate/petrol ether =1/2) as a white solid in 21 % yield, mp 201-202 °C.  $^1\text{H}$  NMR (400 MHz,  $\text{CDCl}_3$ ):  $\delta$  8.78 (d,  $J = 2.8$  Hz, 1H), 8.39 (br, 1H), 8.29 (d,  $J = 8.3$  Hz, 1H), 7.89 (d,  $J = 8.1$  Hz, 1H), 7.82 (d,  $J = 7.3$  Hz, 1H), 7.69 (t,  $J = 7.7$  Hz, 1H), 7.59 – 7.50 (m, 2H), 7.46 (dd,  $J = 7.8, 4.0$  Hz, 1H), 7.29 (d,  $J = 6.6$  Hz, 1H), 2.74 (s, 3H), 1.68 (s, 3H);  $^{13}\text{C}$  NMR (100 MHz,  $\text{CDCl}_3$ ):  $\delta$  169.0, 150.2, 149.6, 145.0, 138.0, 137.6, 133.7, 132.4, 132.0, 131.1, 129.8, 128.1, 127.0, 126.6, 121.5, 119.0, 89.5, 25.3, 17.5; IR (neat,  $\text{cm}^{-1}$ )  $\nu$  3668, 3080, 1708, 1579, 1480, 1193, 1067, 928, 676; HRMS (ESI,  $m/z$ ): calcd for  $\text{C}_{19}\text{H}_{16}\text{N}_2\text{O}_2$   $[\text{M}+\text{H}]^+$ : 305.1290; Found: 305.1296.

### 3-hydroxy-3,5,7-trimethyl-2-(quinolin-8-yl)isoindolin-1-one (4q')

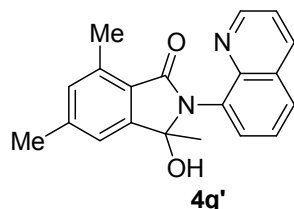

Following the general procedure the title compound was isolated by flash chromatography (eluent: ethyl acetate/petrol ether =1/2) as a white solid in 18 % yield, mp 201-202 °C.  $^1\text{H}$  NMR (400 MHz,  $\text{CDCl}_3$ ):  $\delta$  8.79 (d,  $J = 4.2$  Hz, 1H), 8.30 (d,  $J = 8.3$  Hz, 1H), 7.90 (d,  $J = 8.2$  Hz, 1H), 7.81 (d,  $J = 7.4$  Hz, 1H), 7.69 (t,  $J = 7.8$  Hz,

1H), 7.48 (dd,  $J = 8.3, 4.3$  Hz, 1H), 7.32 (s, 1H), 7.10 (s, 1H), 2.69 (s, 3H), 2.47 (s, 3H), 1.66 (s, 3H);  $^{13}\text{C}$  NMR (100 MHz,  $\text{CDCl}_3$ ):  $\delta$  169.0, 150.6, 149.6, 145.0, 143.3, 137.8, 137.7, 133.9, 132.1, 129.8, 128.1, 127.0, 124.1, 121.5, 119.6, 89.4, 25.3, 21.8, 17.4; IR (neat,  $\text{cm}^{-1}$ )  $\nu$  3673, 2997, 1718, 1485, 1189, 1064, 914, 676; HRMS (ESI,  $m/z$ ): calcd for  $\text{C}_{20}\text{H}_{18}\text{N}_2\text{O}_2$   $[\text{M}+\text{H}]^+$ : 319.1447; Found: 319.1443.

## References

1. A. M. Suess, M. Z. Ertem, C. J. Cramer and S. S. Stahl, *J. Am. Chem. Soc.*, 2013, **135**, 9797.
2. N. Kornblum and H. E. Ungnade, *Org. Synth.*, 1963, **4**, 724.
3. (a) L. D. Tran, I. Popov, O. Daugulis, *J. Am. Chem. Soc.*, 2012, **134**, 18237; (b) T. Truong, K. Klimovica, O. Daugulis, *J. Am. Chem. Soc.*, 2013, **135**, 9342; (c) L. D. Tran, J. Roane, O. Daugulis, *Angew. Chem., Int. Ed.*, 2013, **52**, 6043; (d) J. Roane, O. Daugulis, *Org. Lett.*, 2013, **15**, 5842; (e) M. Nishino, K. Hirano, T. Satoh, M. Miura, *Angew. Chem. Int. Ed.*, 2013, **52**, 4457.
4. X. Wu, J. Miao, Y. Li, G. Li and H. Ge, *Chem. Sci.*, 2016, **7**, 5260.

## $^1\text{H}$ NMR Spectrum of **1f**

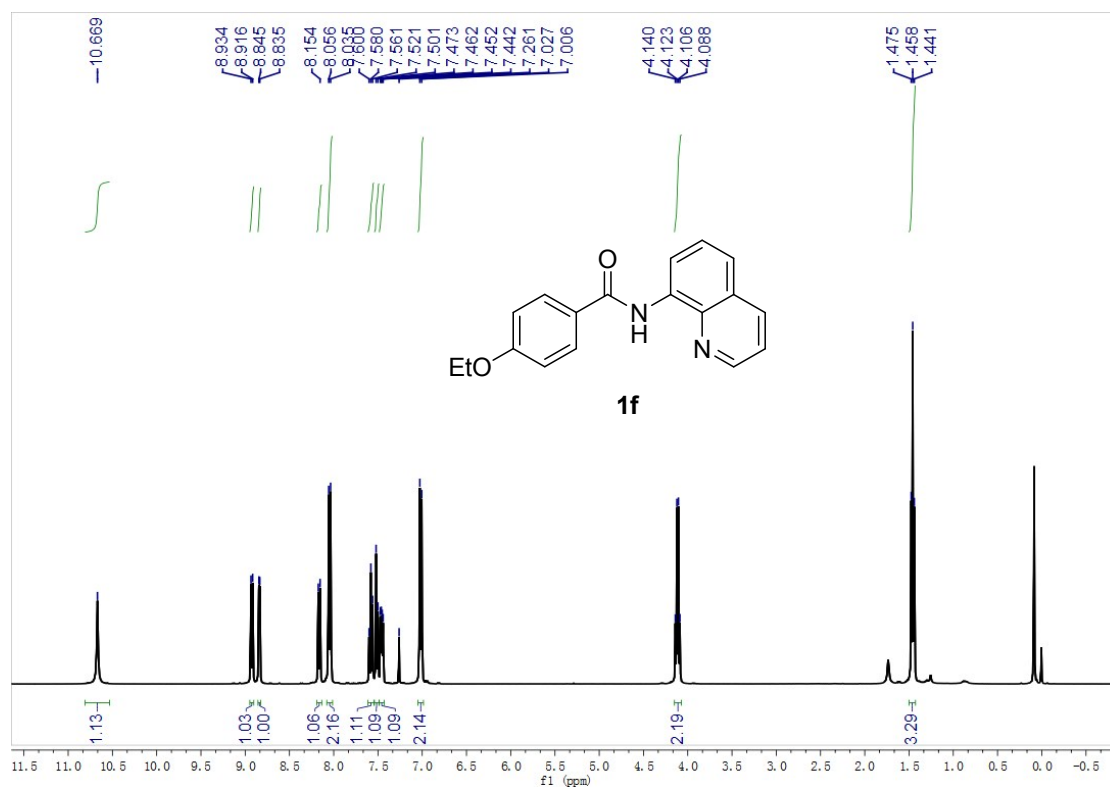

### <sup>13</sup>C NMR Spectrum of **1f**

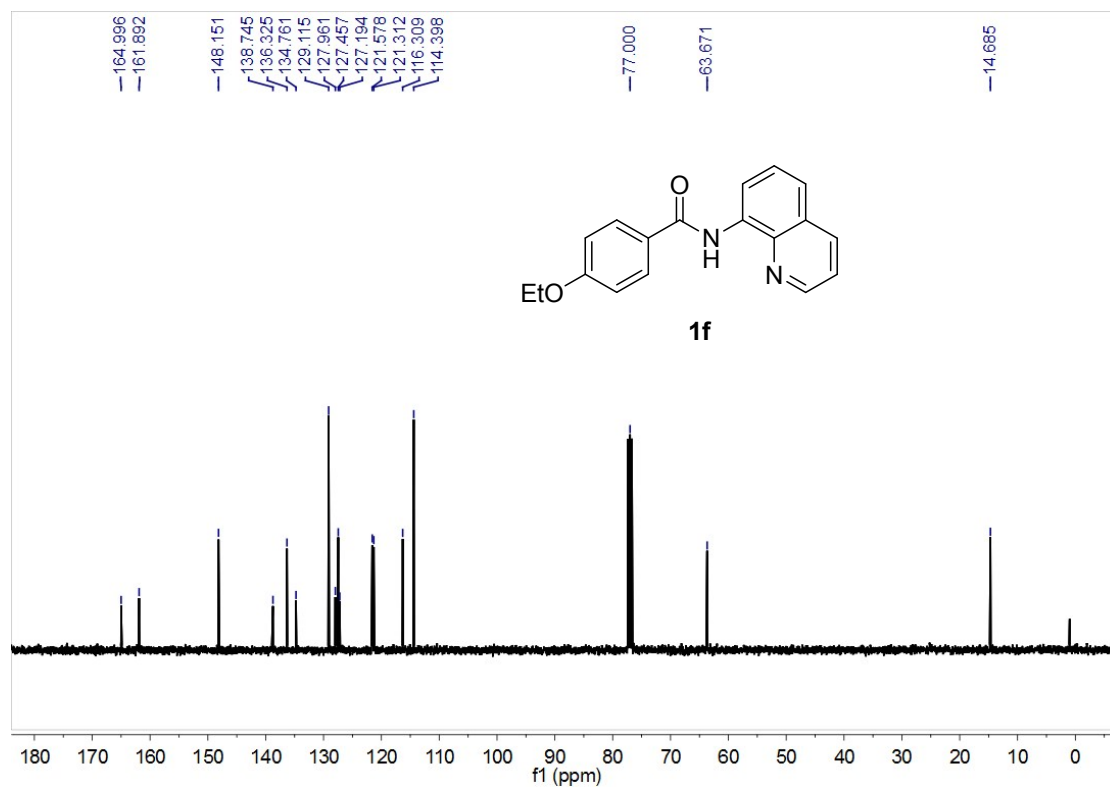

### <sup>1</sup>H NMR Spectrum of **1r**

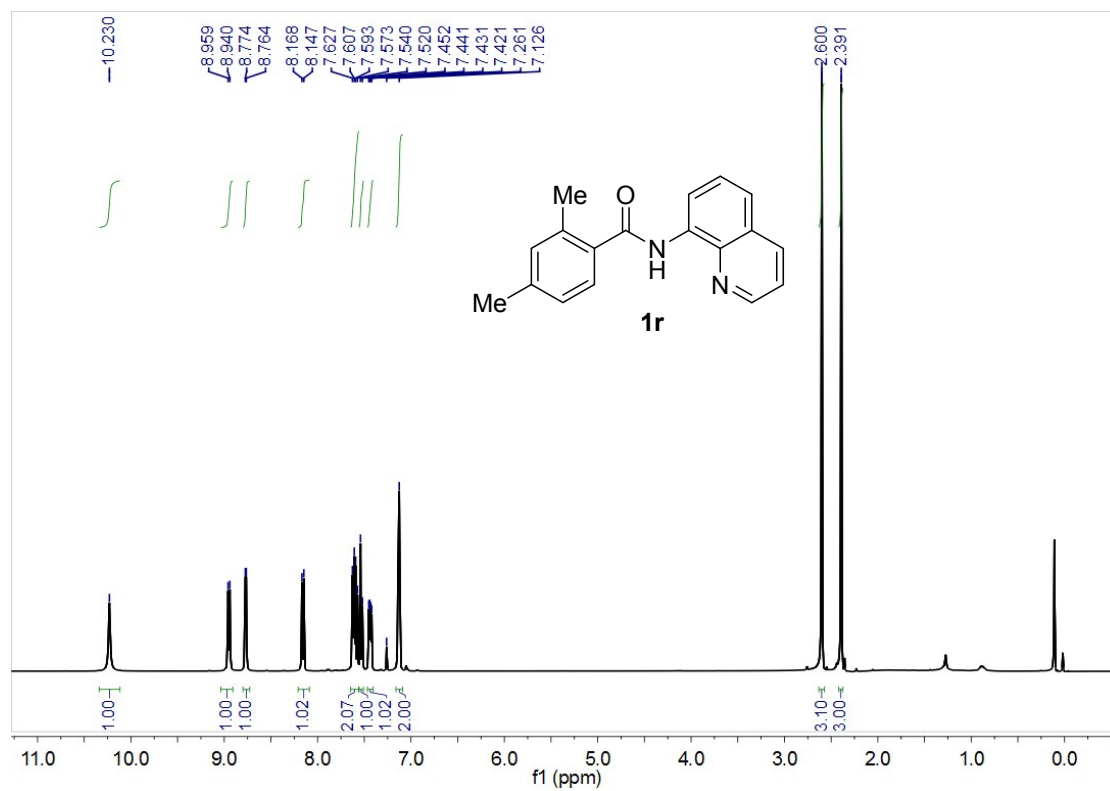

### $^{13}\text{C}$ NMR Spectrum of **1t**

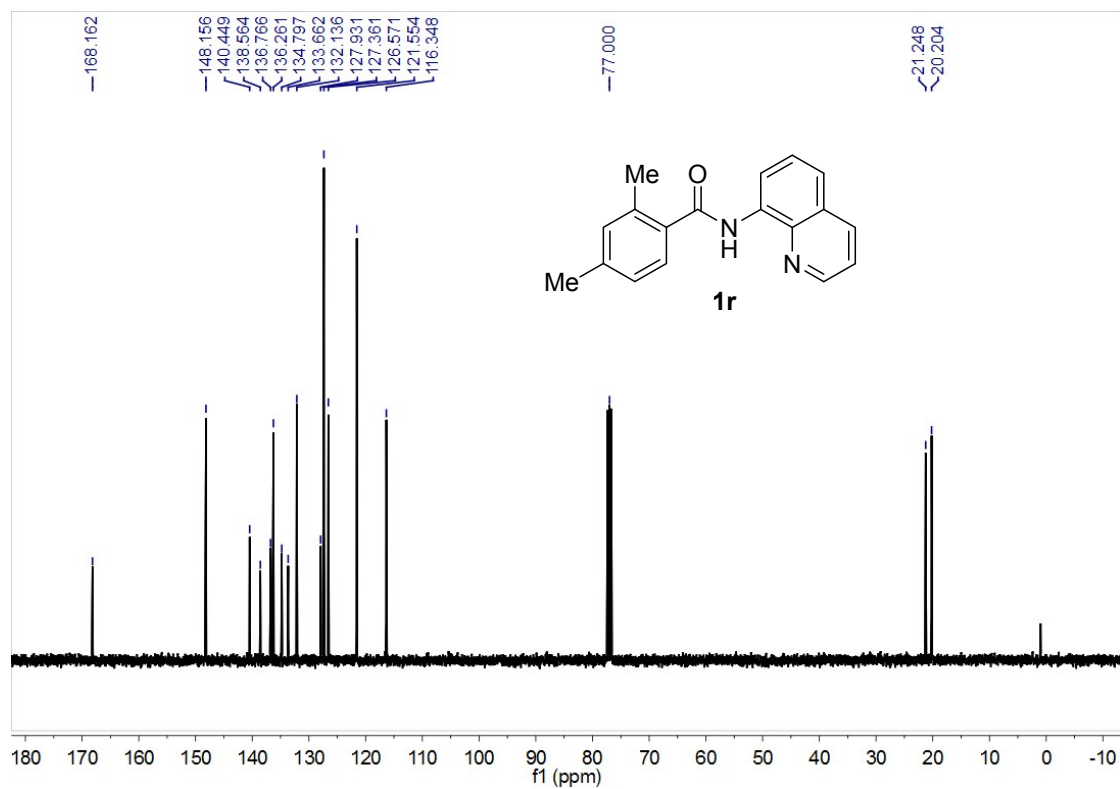

### $^1\text{H}$ NMR Spectrum of **4a**

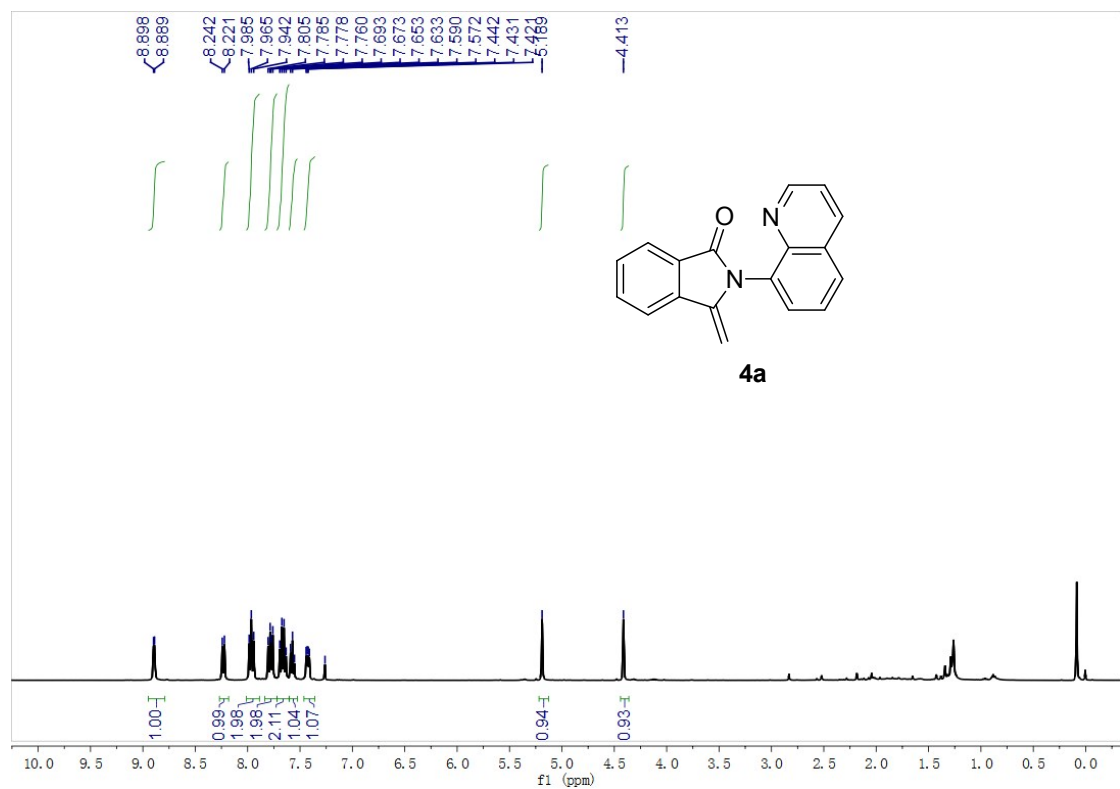

### <sup>13</sup>C NMR Spectrum of **4a**

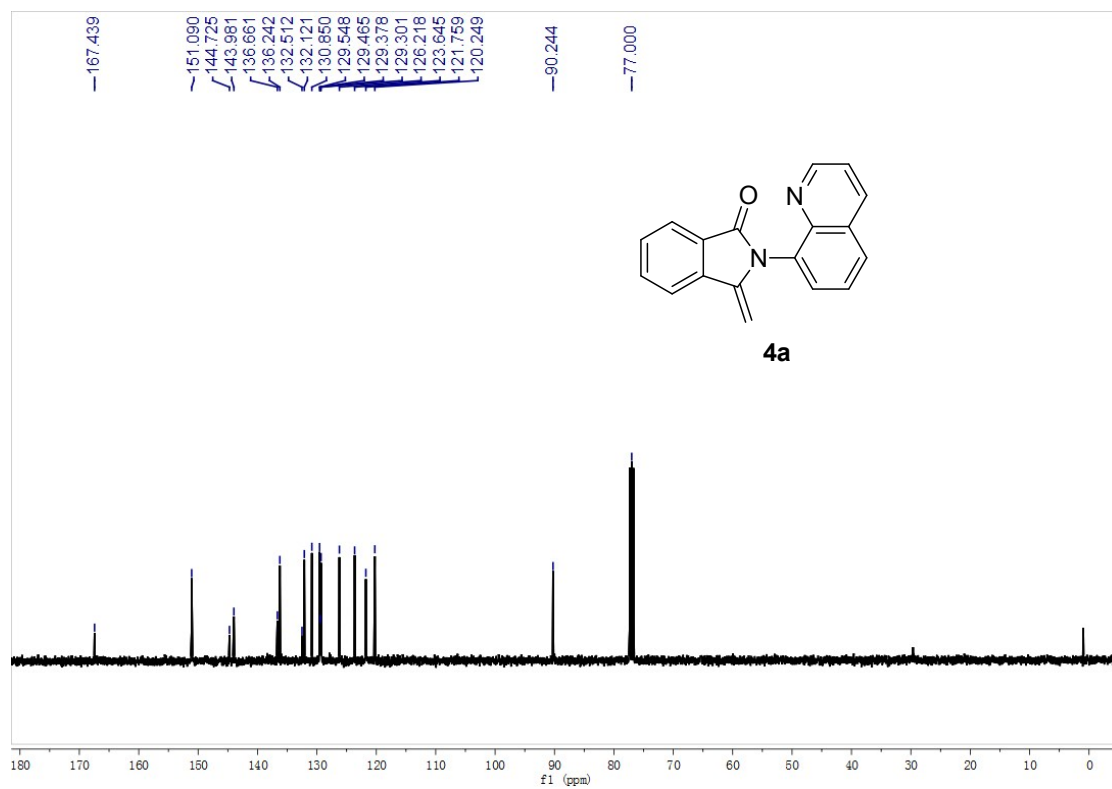

### <sup>1</sup>H NMR Spectrum of **4b**

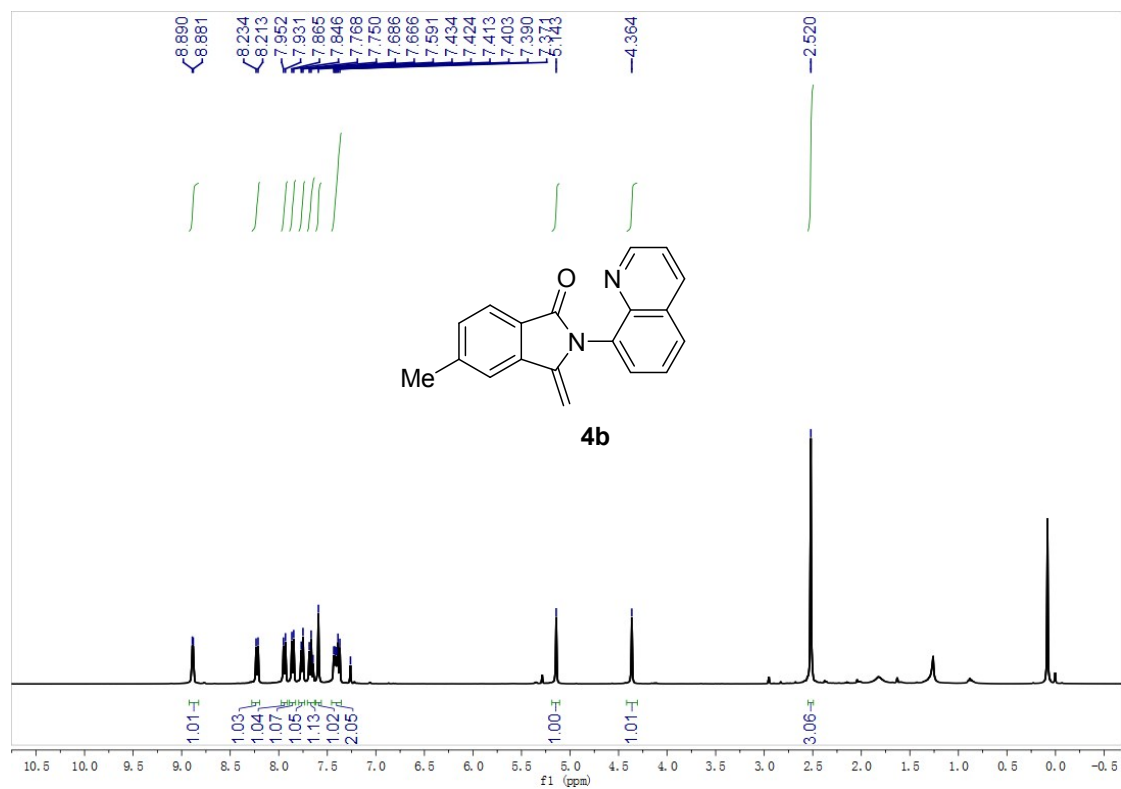

### <sup>13</sup>C NMR Spectrum of **4b**

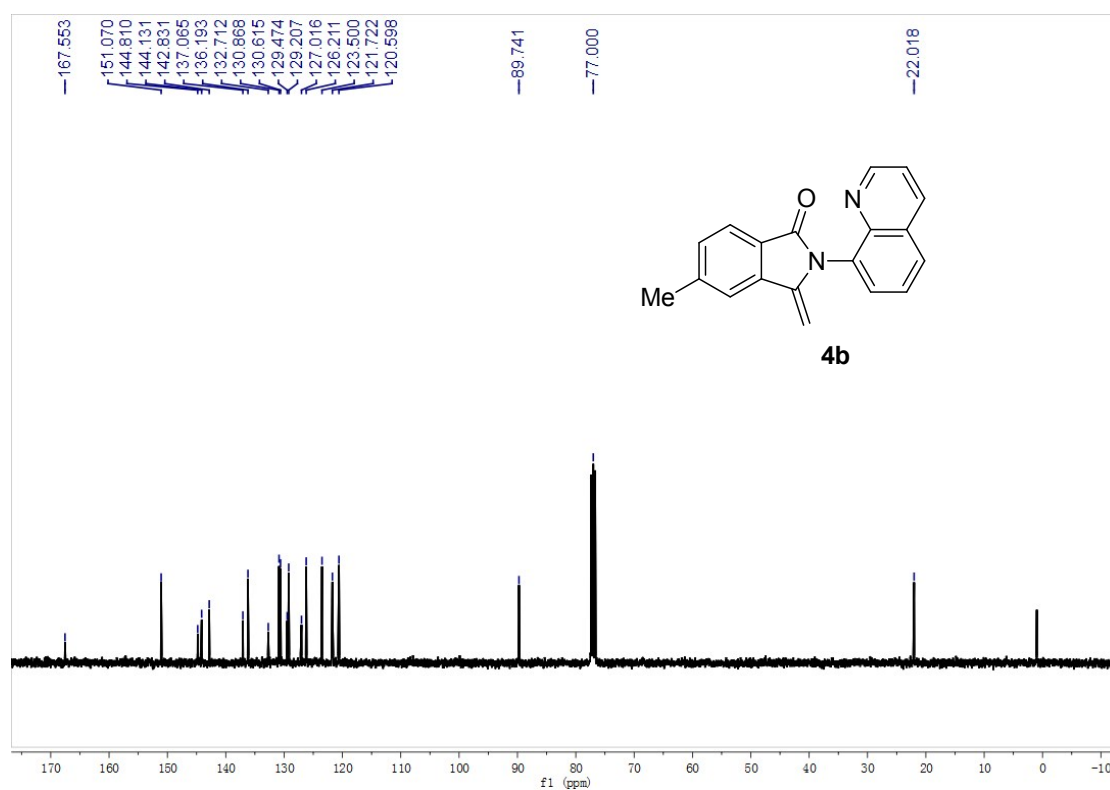

### <sup>1</sup>H NMR Spectrum of **4c**

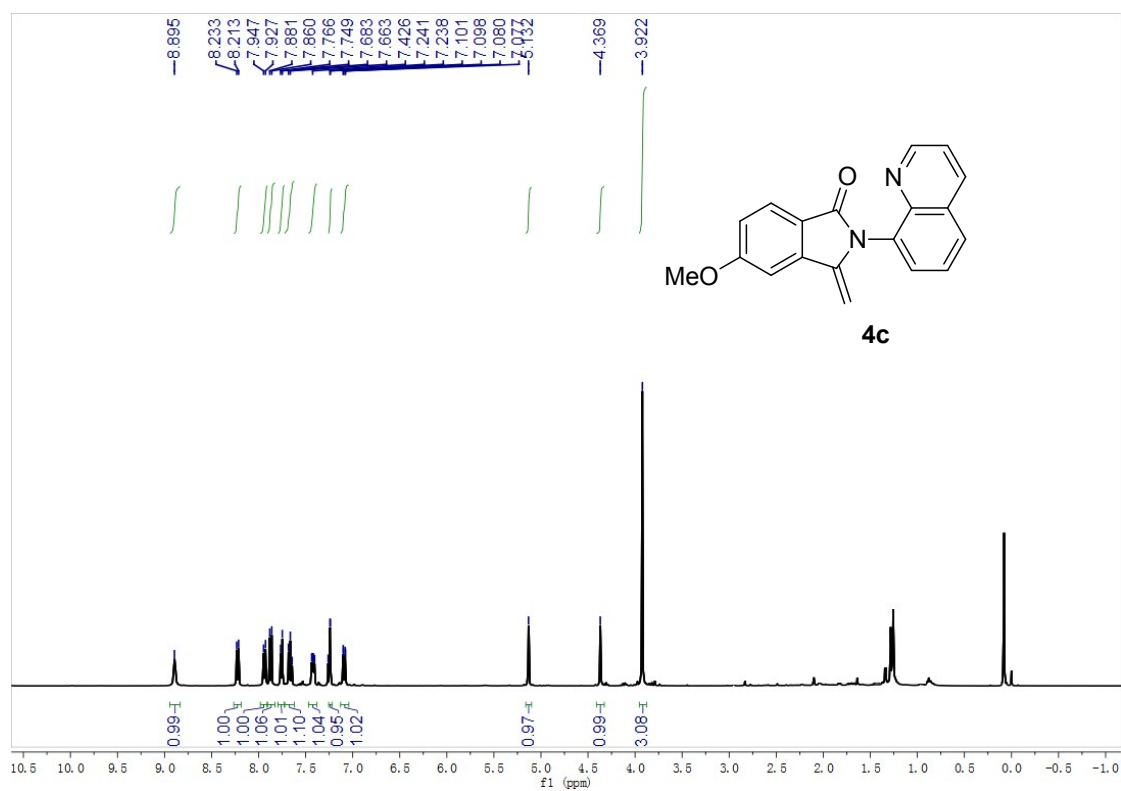

### <sup>13</sup>C NMR Spectrum of 4c

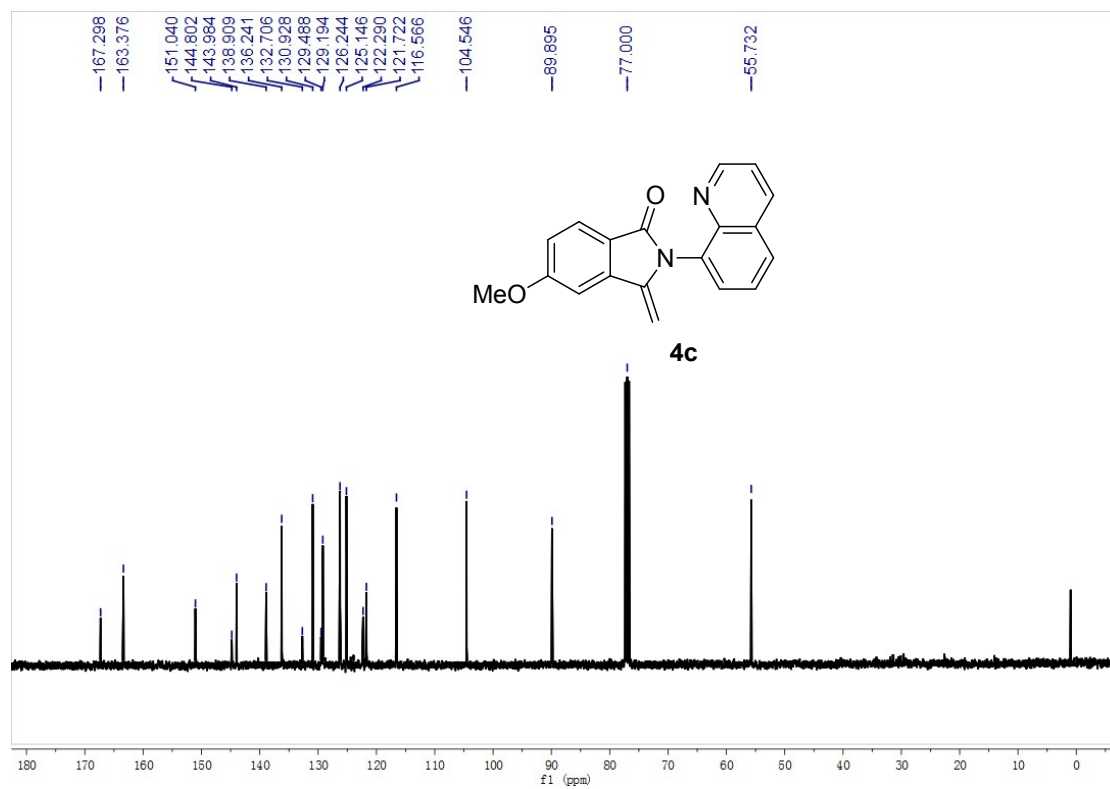

### <sup>1</sup>H NMR Spectrum of 4d

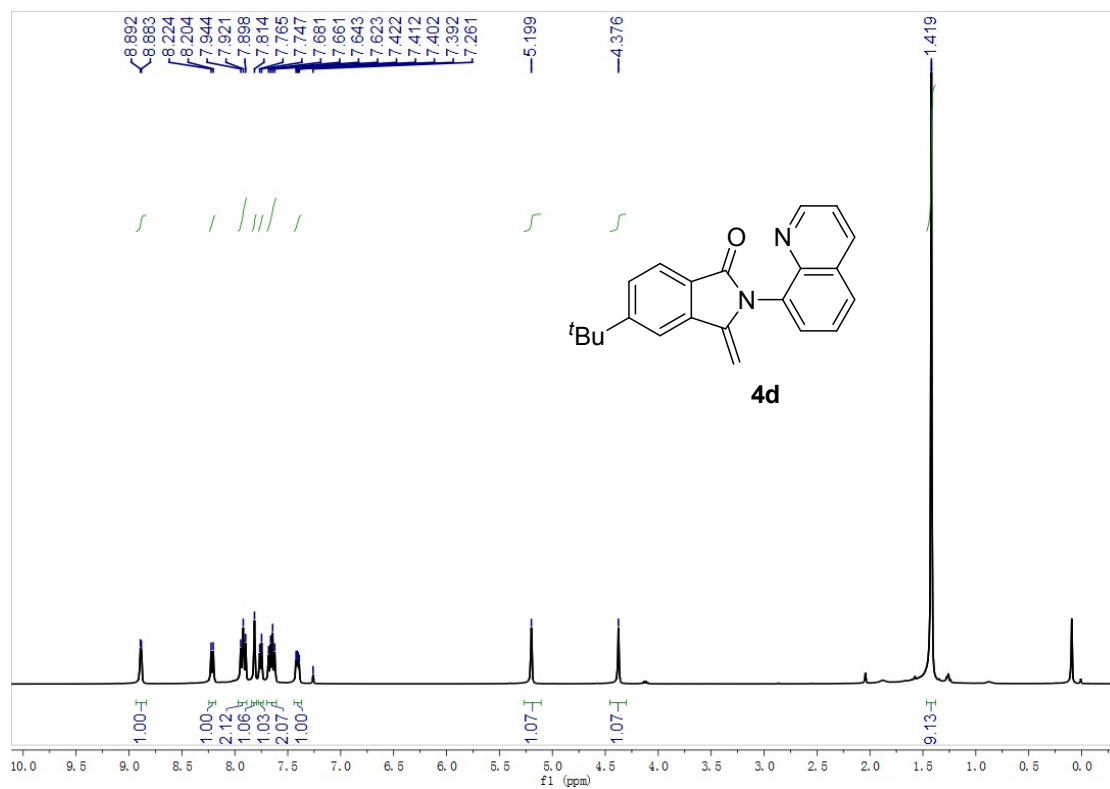

### <sup>13</sup>C NMR Spectrum of **4d**

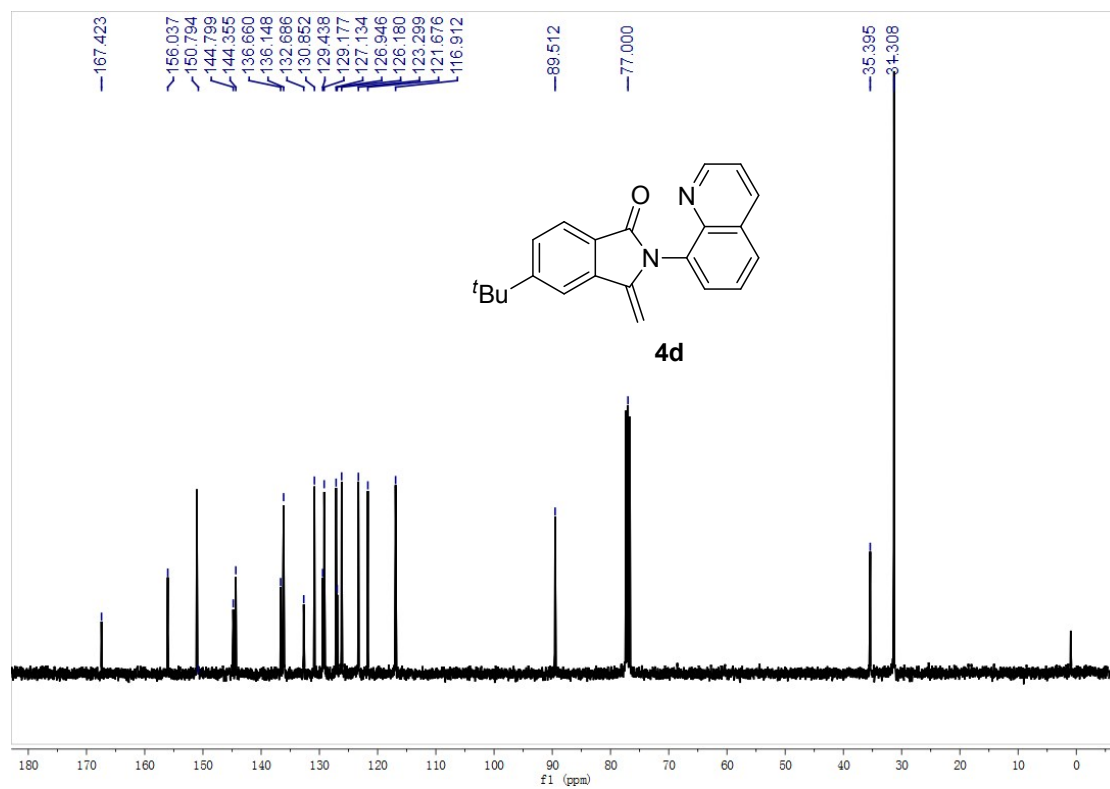

### <sup>1</sup>H NMR Spectrum of **4e**

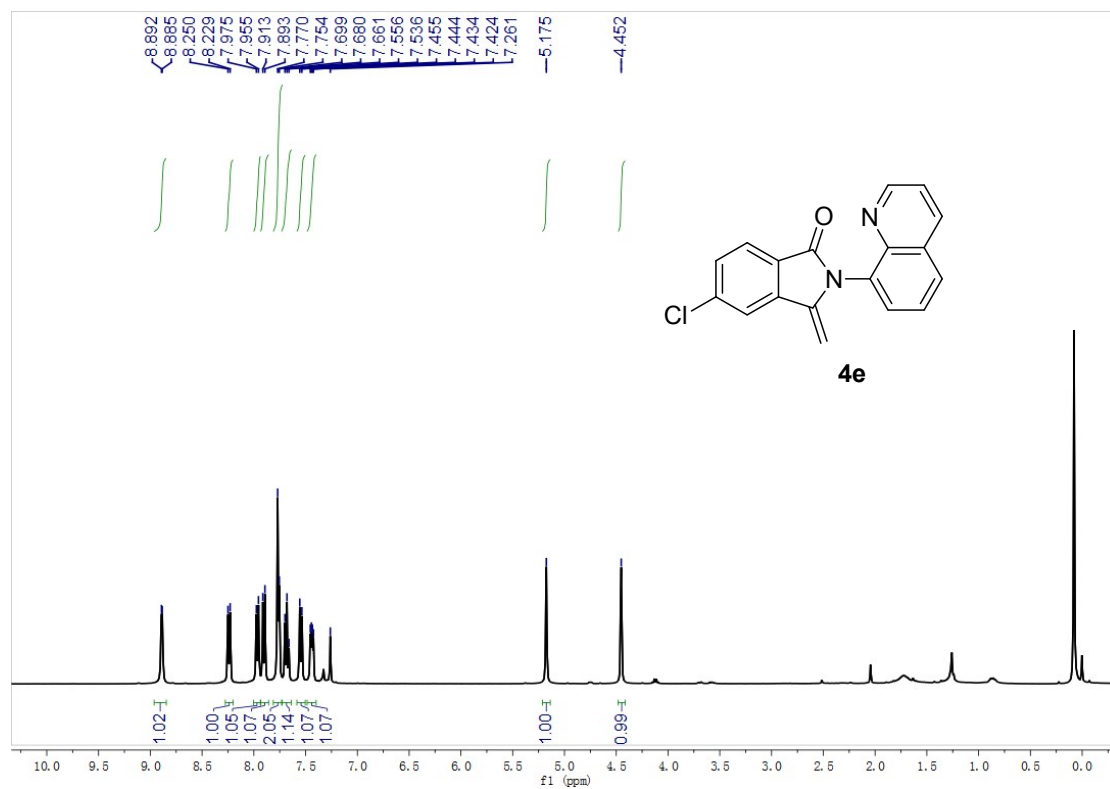



### <sup>13</sup>C NMR Spectrum of 4e

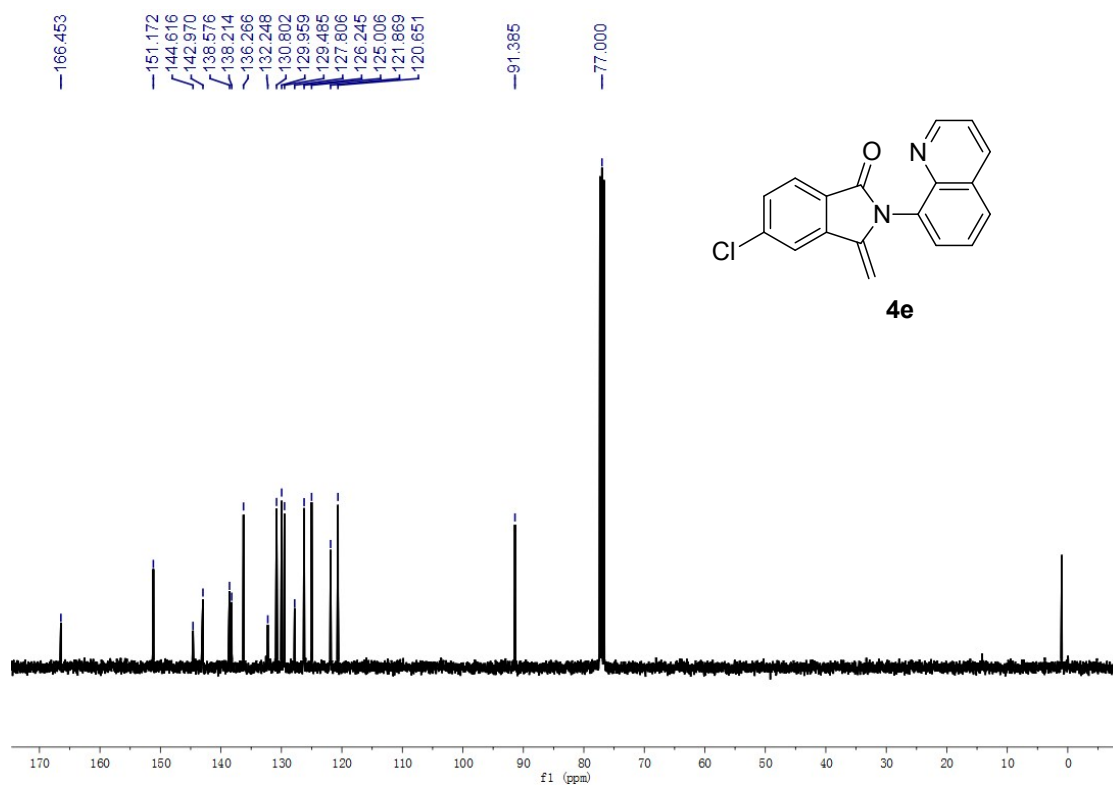

### <sup>1</sup>H NMR Spectrum of 4f

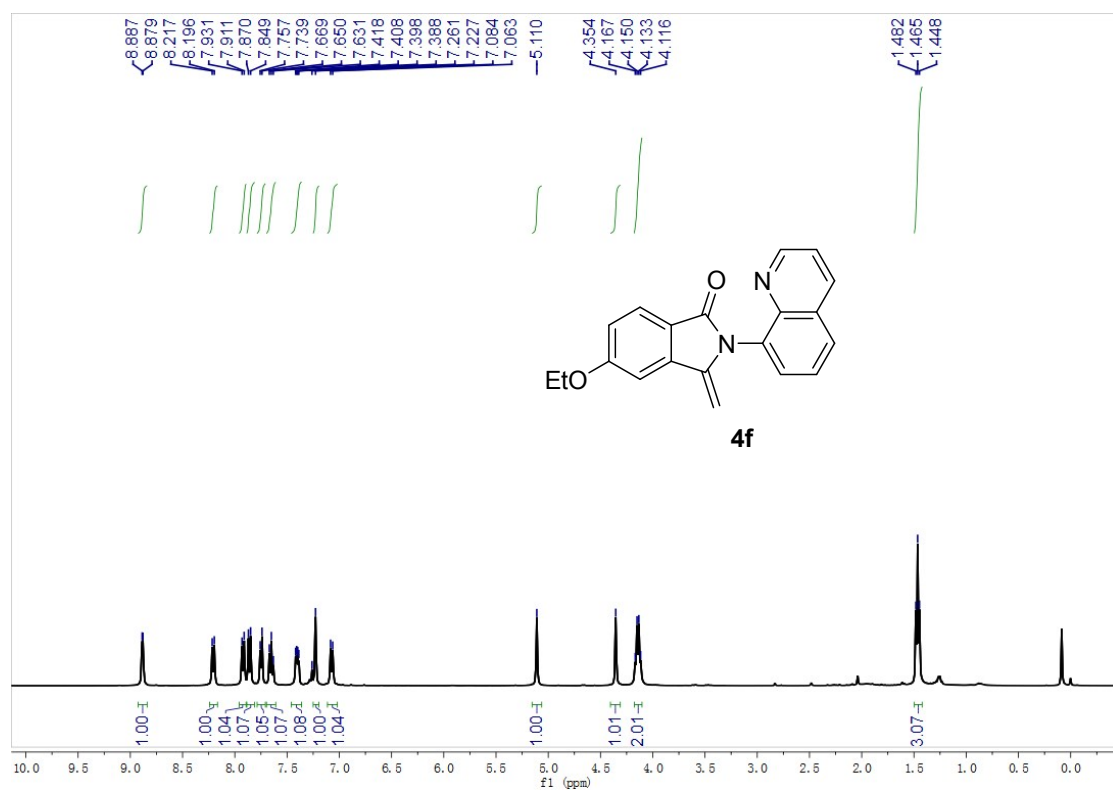

### <sup>13</sup>C NMR Spectrum of 4f

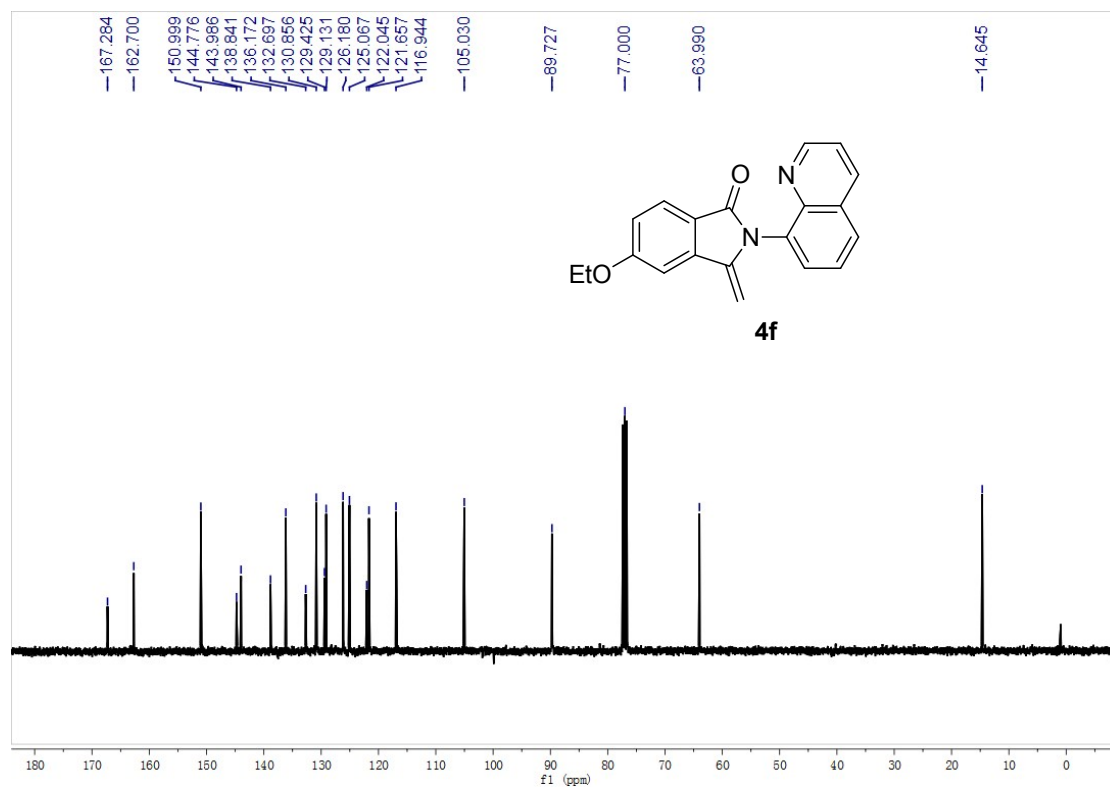

### <sup>1</sup>H NMR Spectrum of 4g

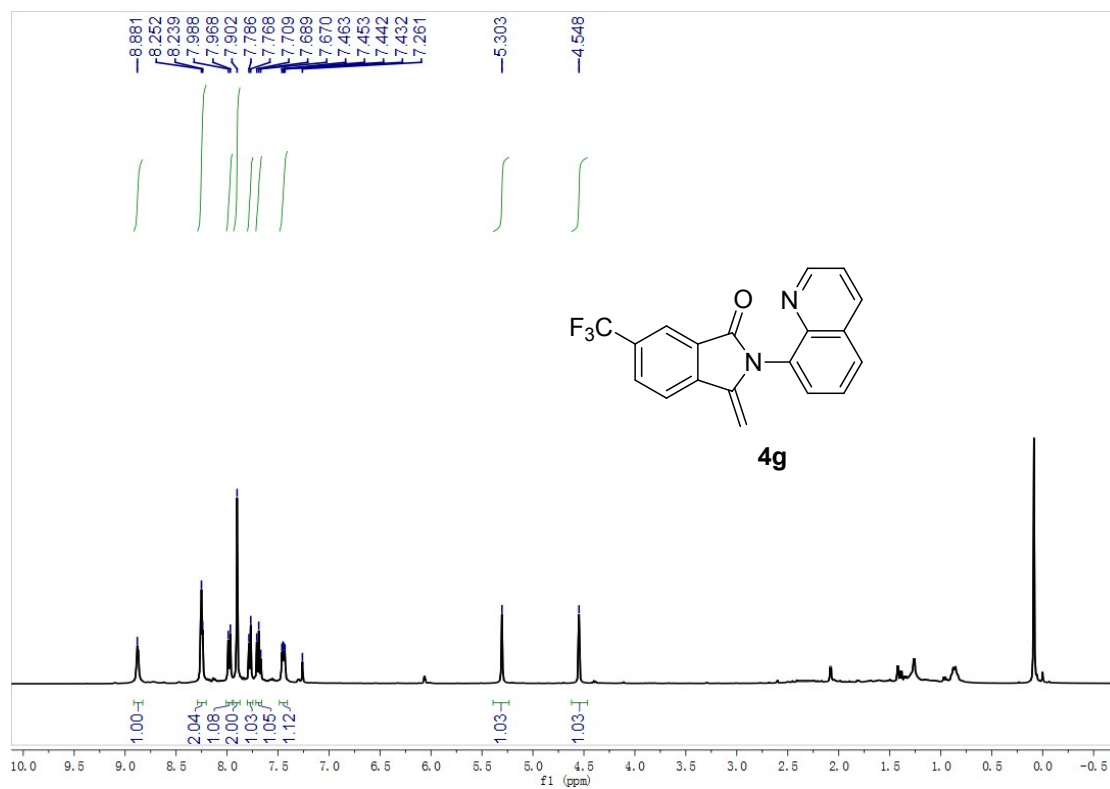

### <sup>13</sup>C NMR Spectrum of **4g**

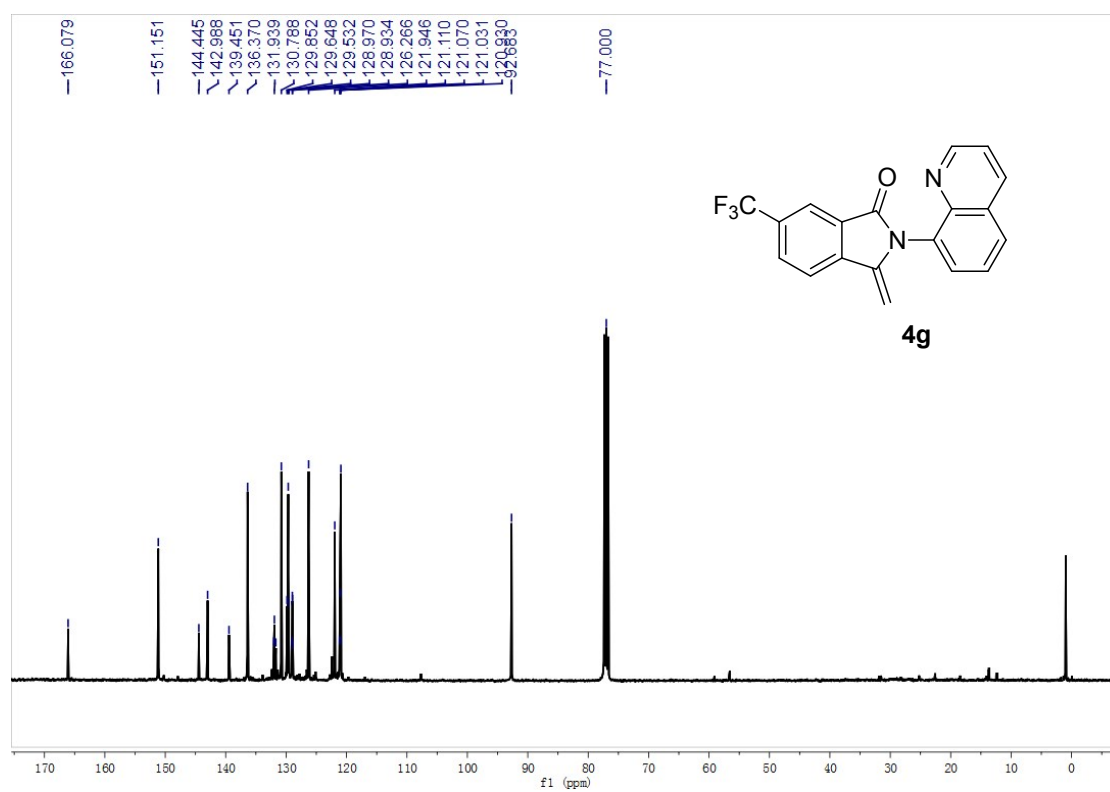

### <sup>19</sup>F NMR Spectrum of **4g**

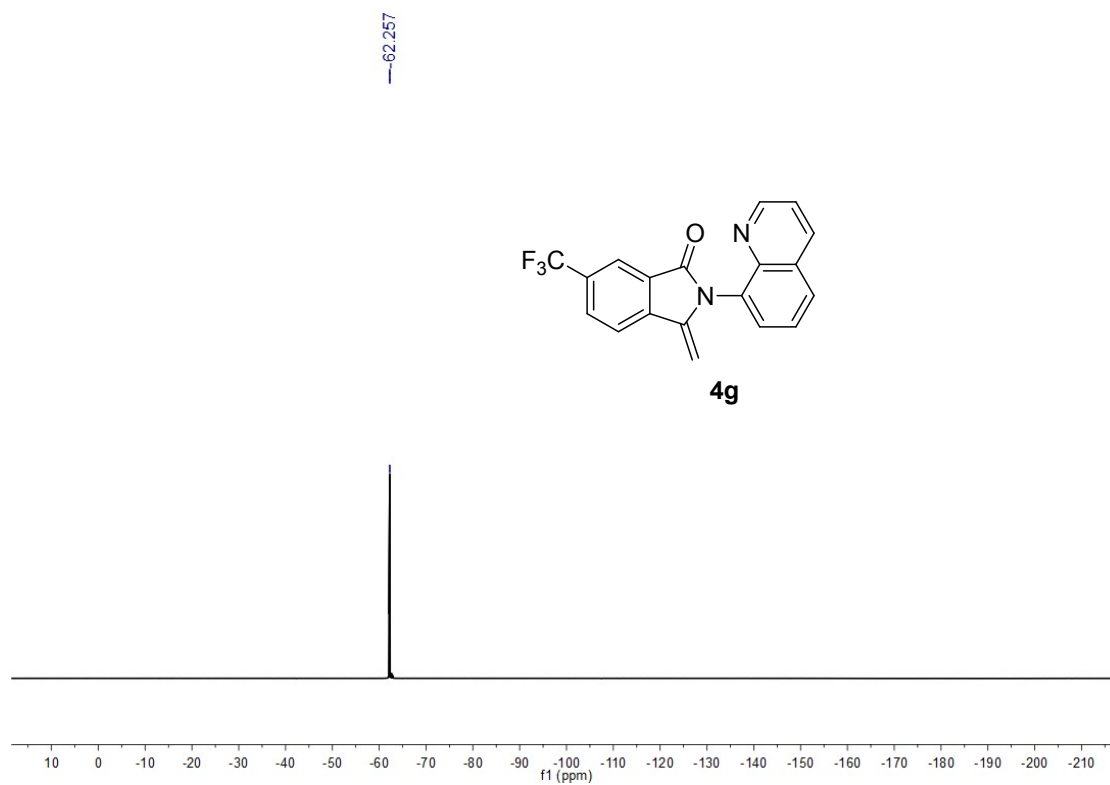

### <sup>1</sup>H NMR Spectrum of **4h**

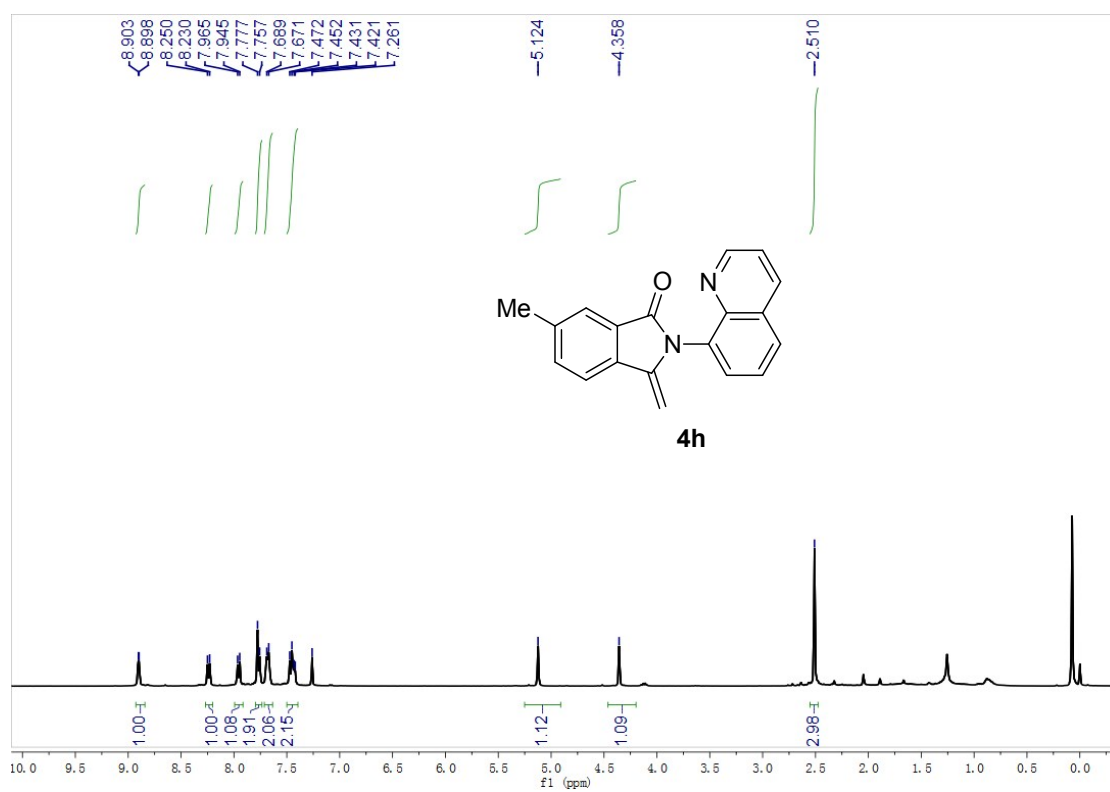

### <sup>13</sup>C NMR Spectrum of **4h**

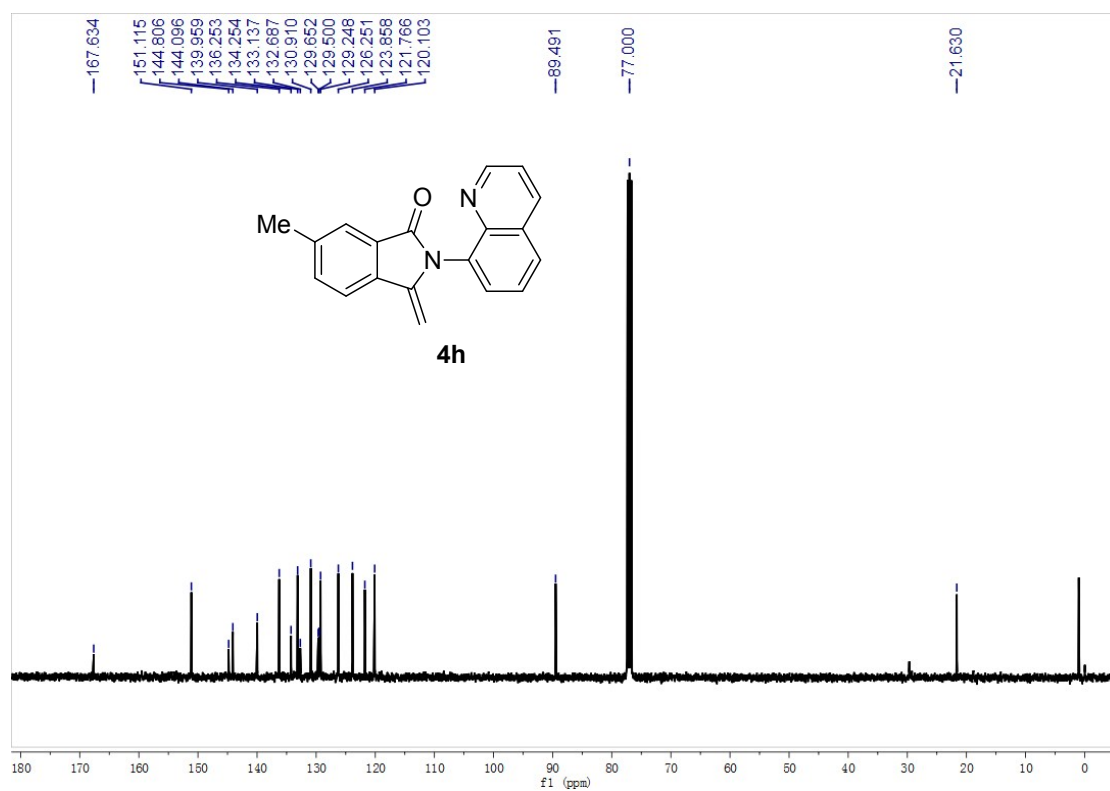

### <sup>1</sup>H NMR Spectrum of **4i**

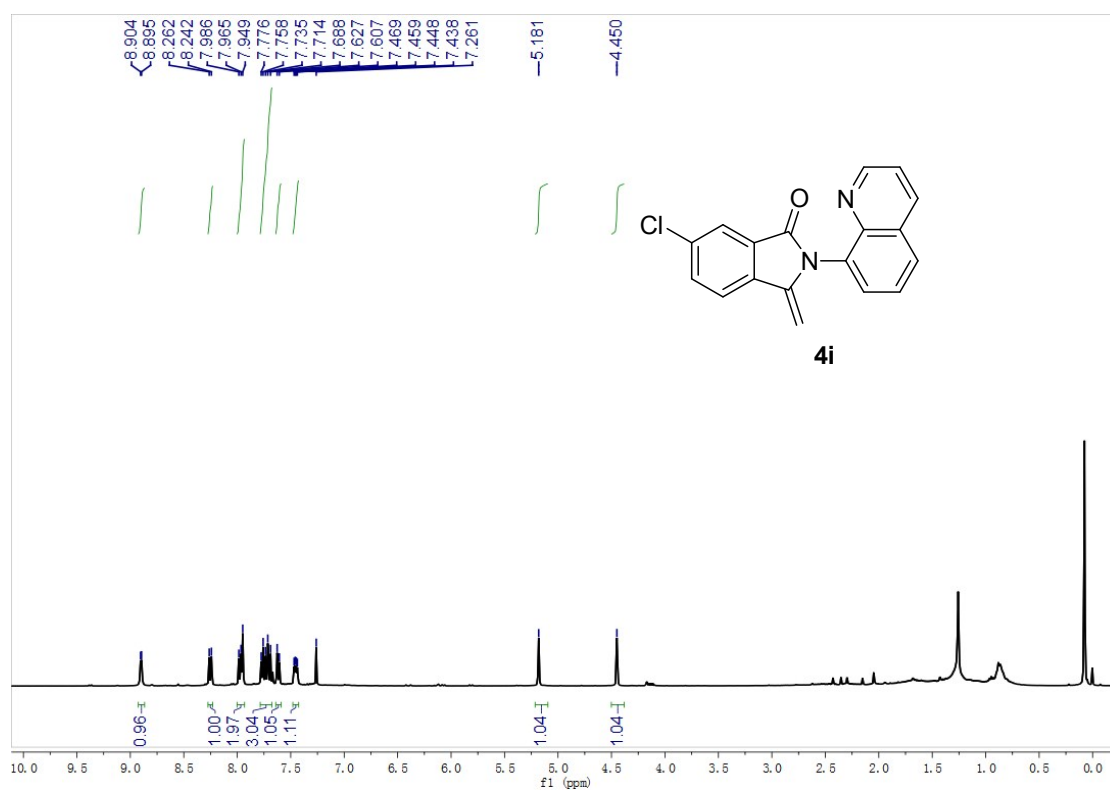

### <sup>13</sup>C NMR Spectrum of **4i**

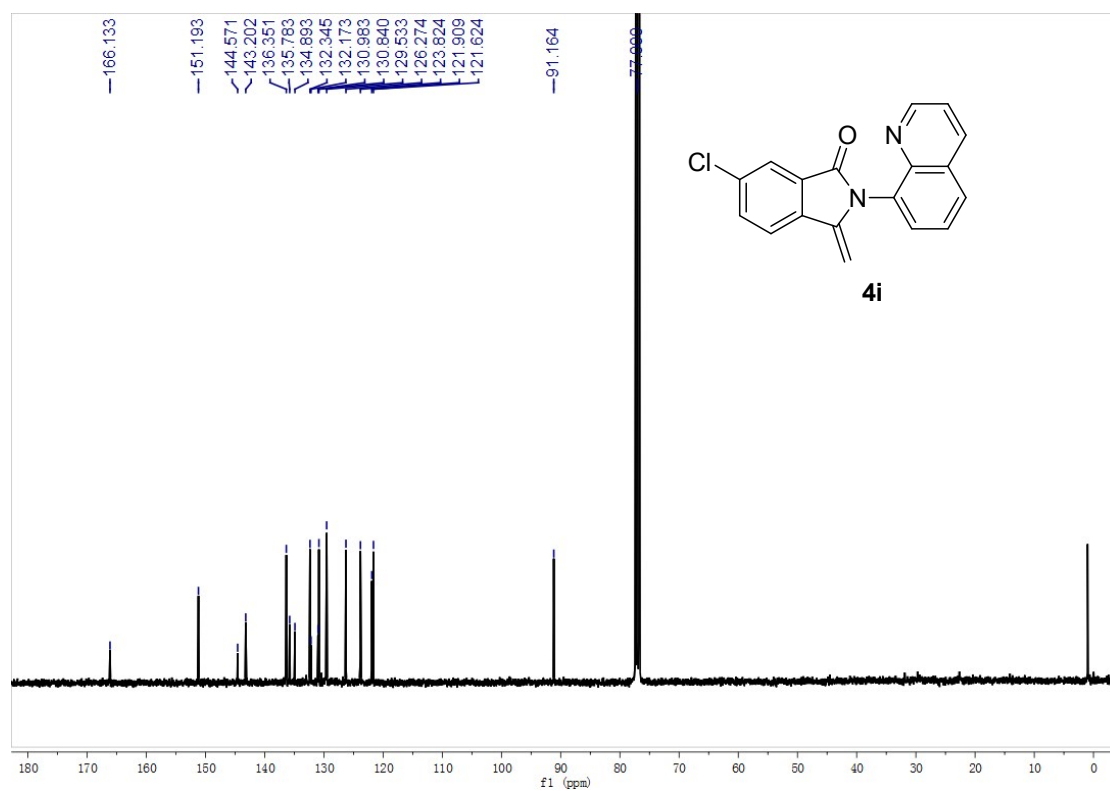

### <sup>1</sup>H NMR Spectrum of 4j

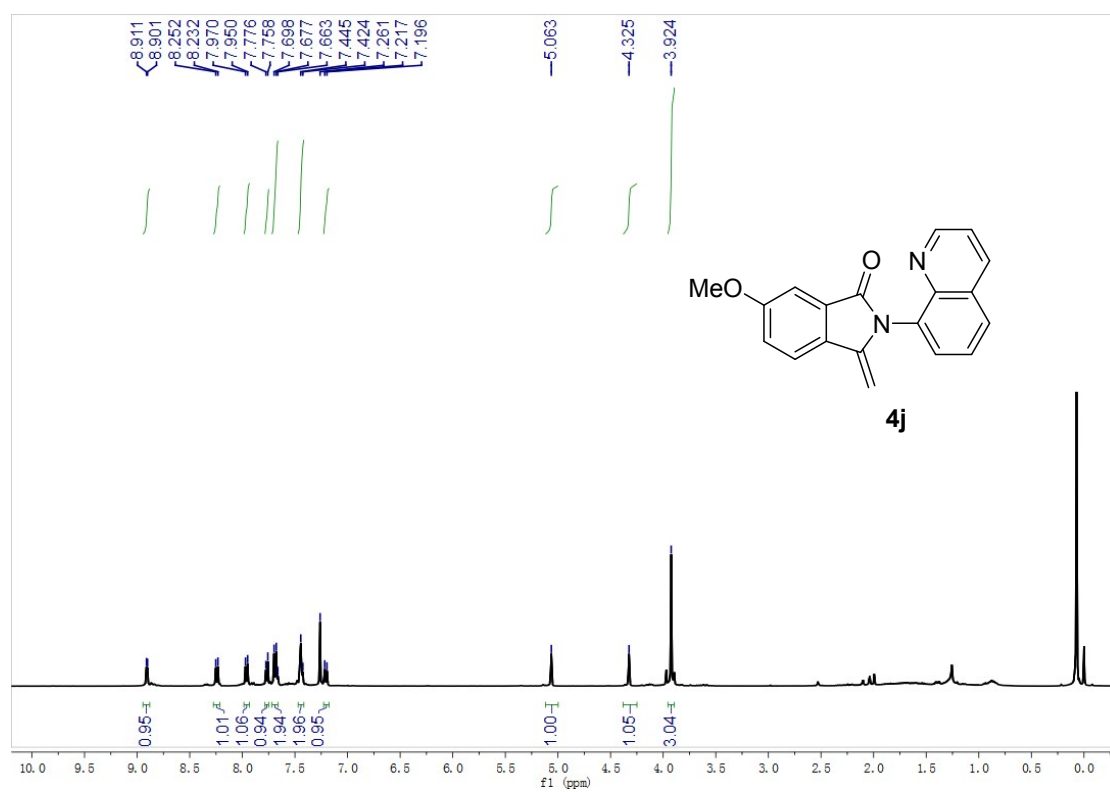

### <sup>13</sup>C NMR Spectrum of 4j

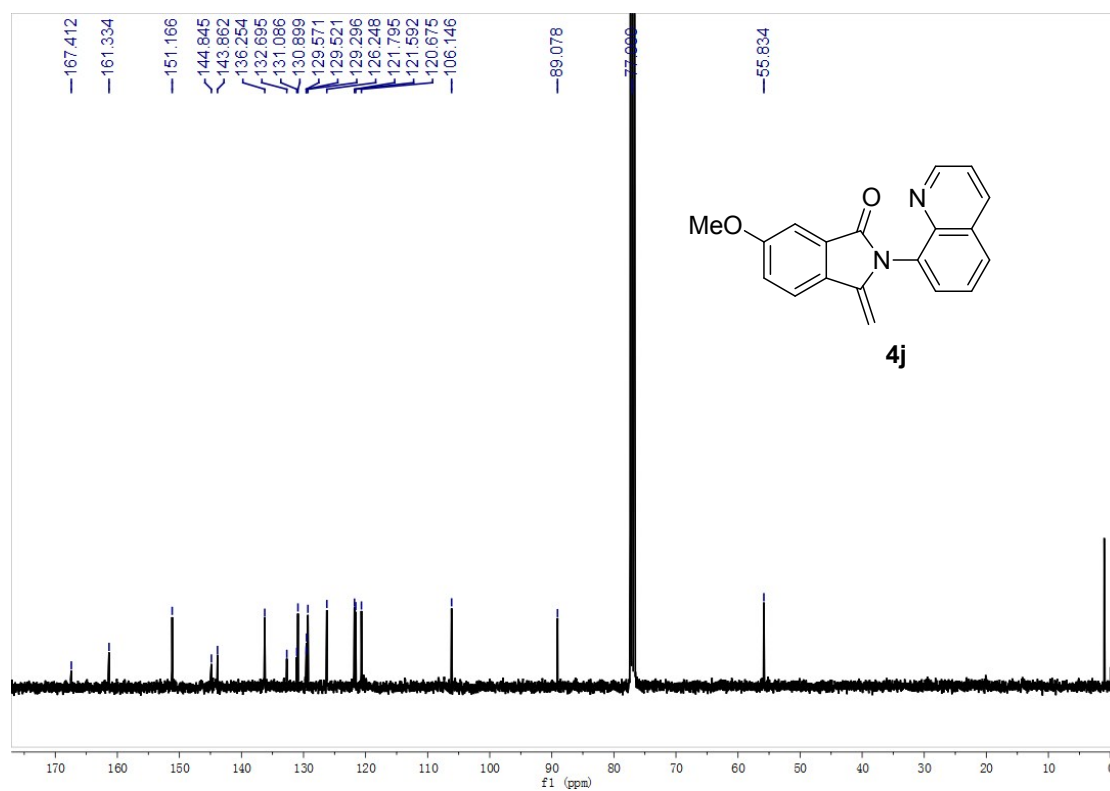

### <sup>1</sup>H NMR Spectrum of **4k**

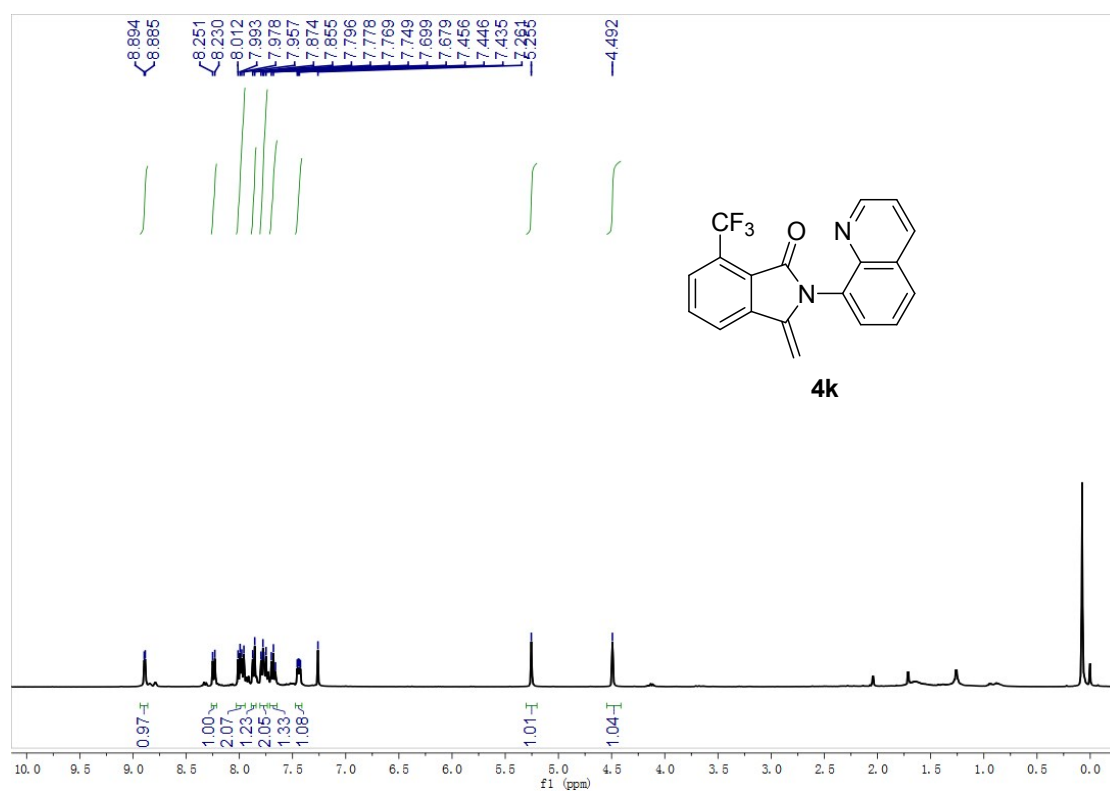

### <sup>13</sup>C NMR Spectrum of **4k**

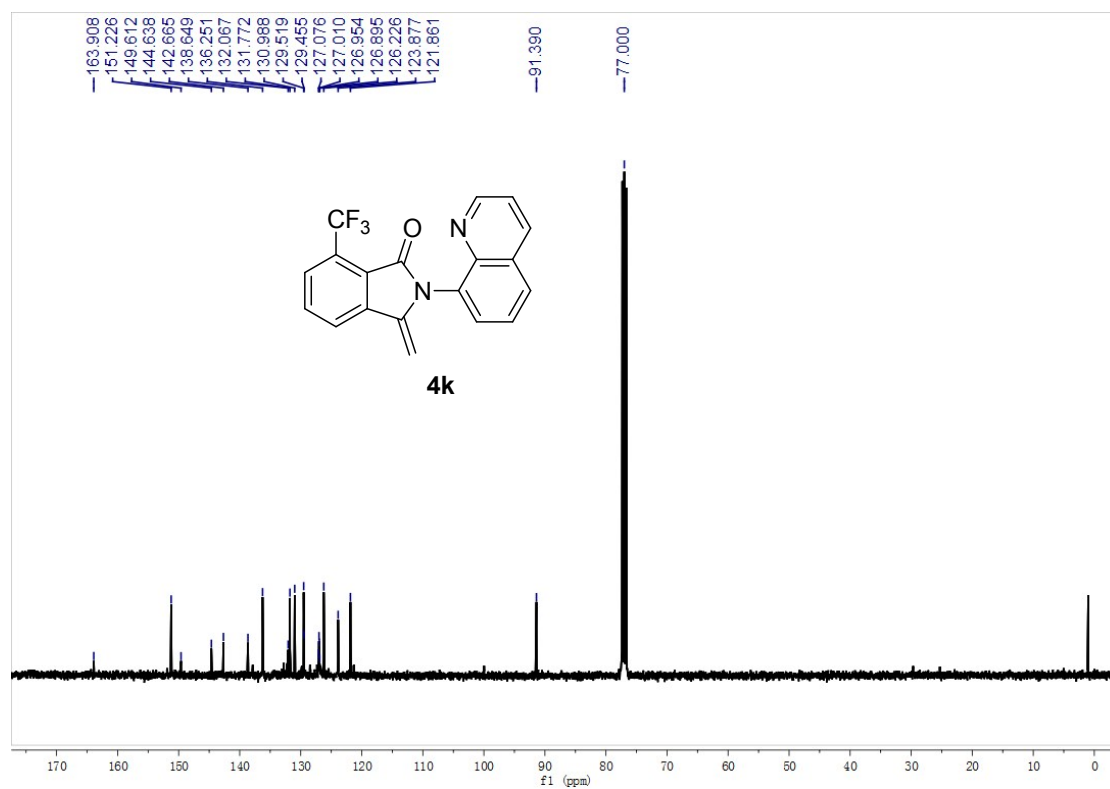

### <sup>19</sup>F NMR Spectrum of **4k**

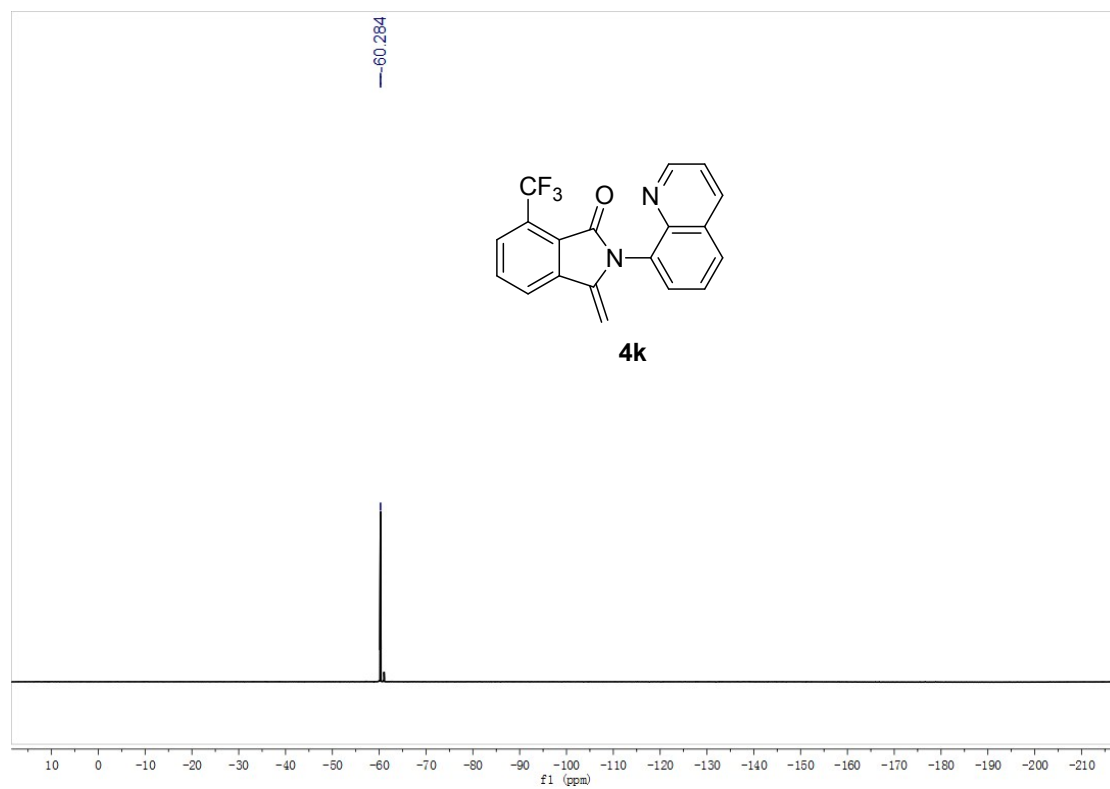

### <sup>1</sup>H NMR Spectrum of **4l**

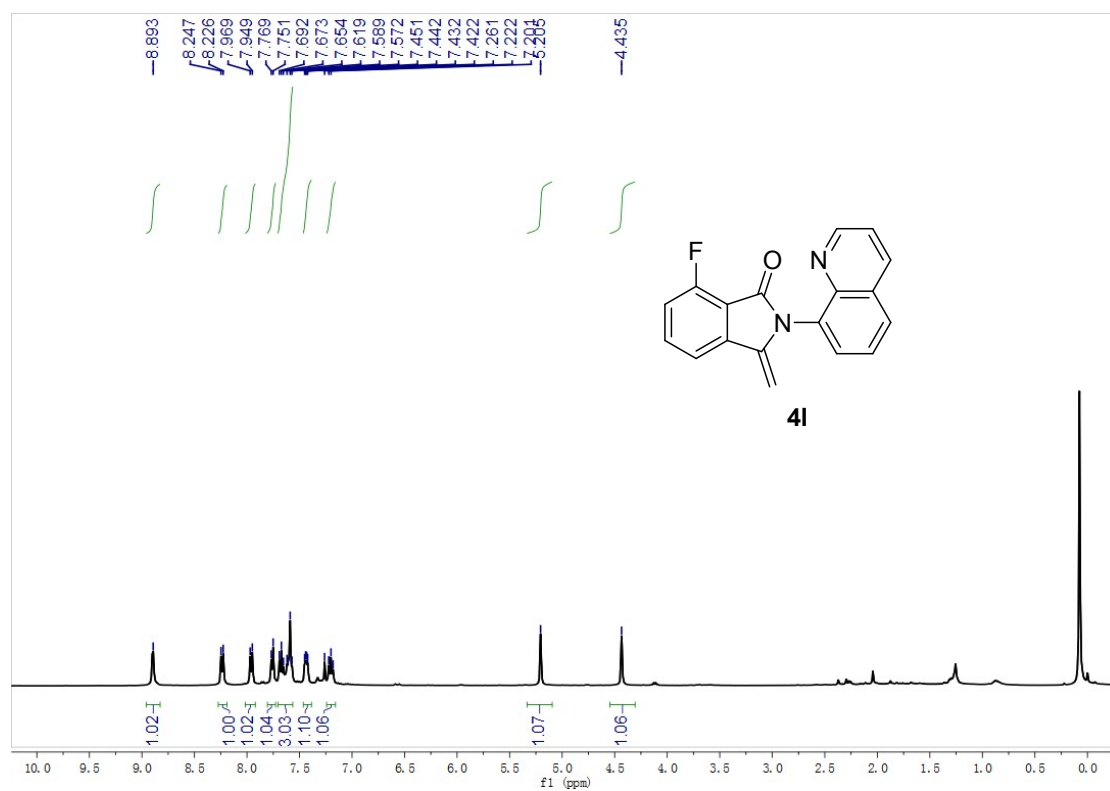



### <sup>13</sup>C NMR Spectrum of **4l**

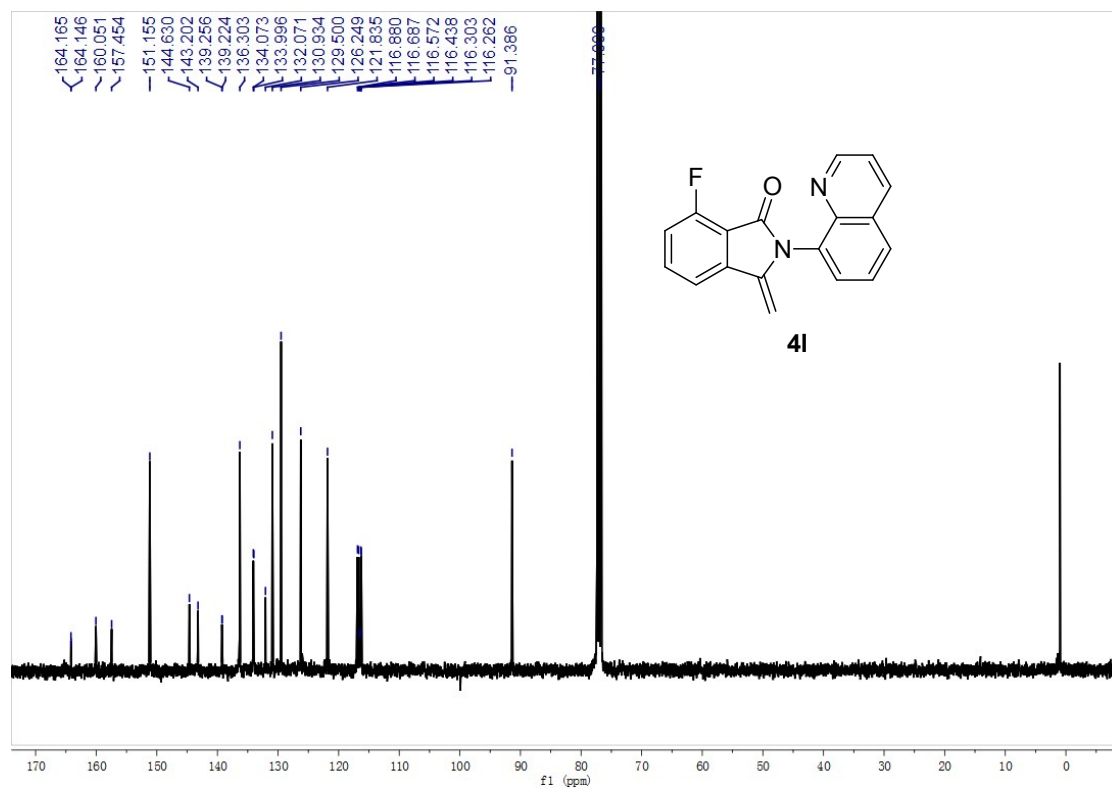

### <sup>19</sup>F NMR Spectrum of **4l**

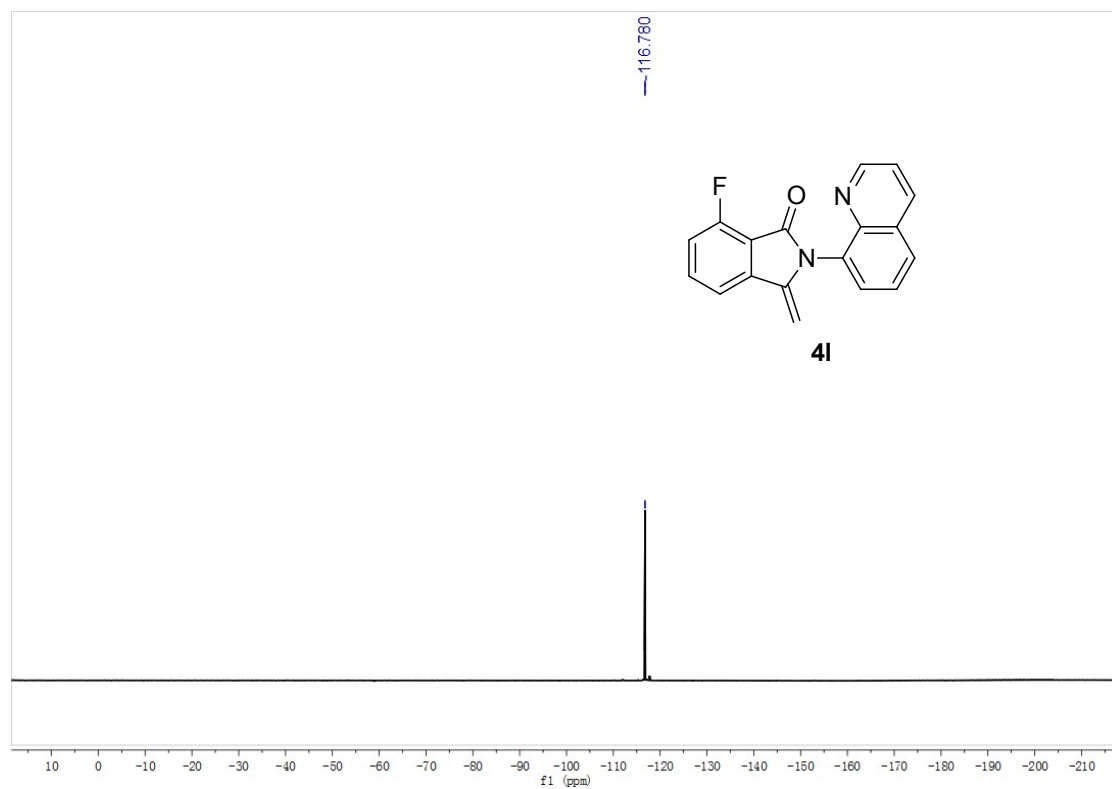

### <sup>1</sup>H NMR Spectrum of 4m

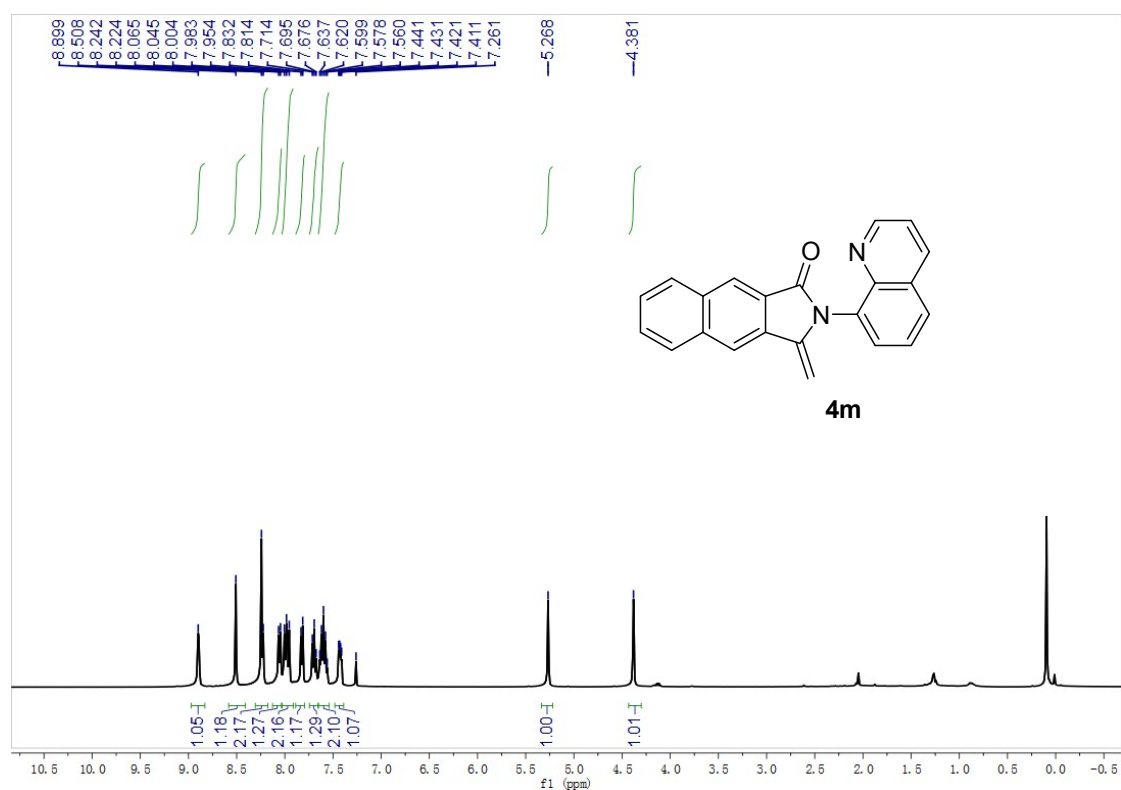

### <sup>13</sup>C NMR Spectrum of 4m

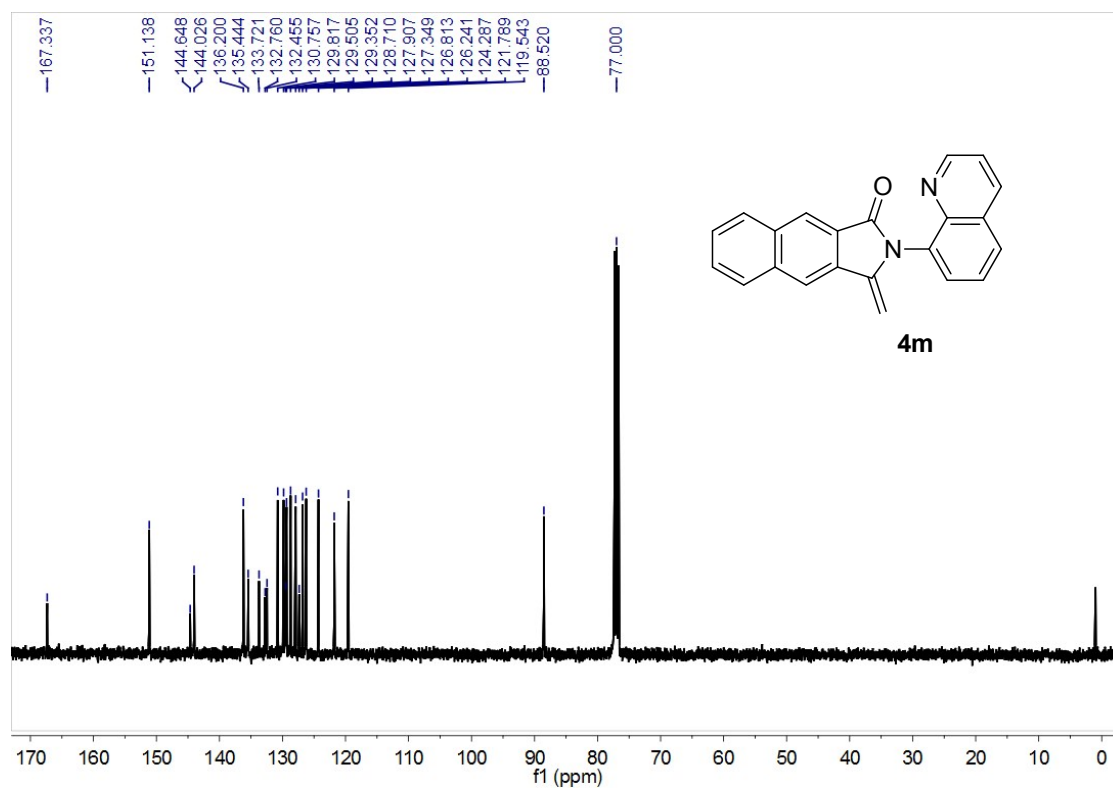

### <sup>1</sup>H NMR Spectrum of **4n**

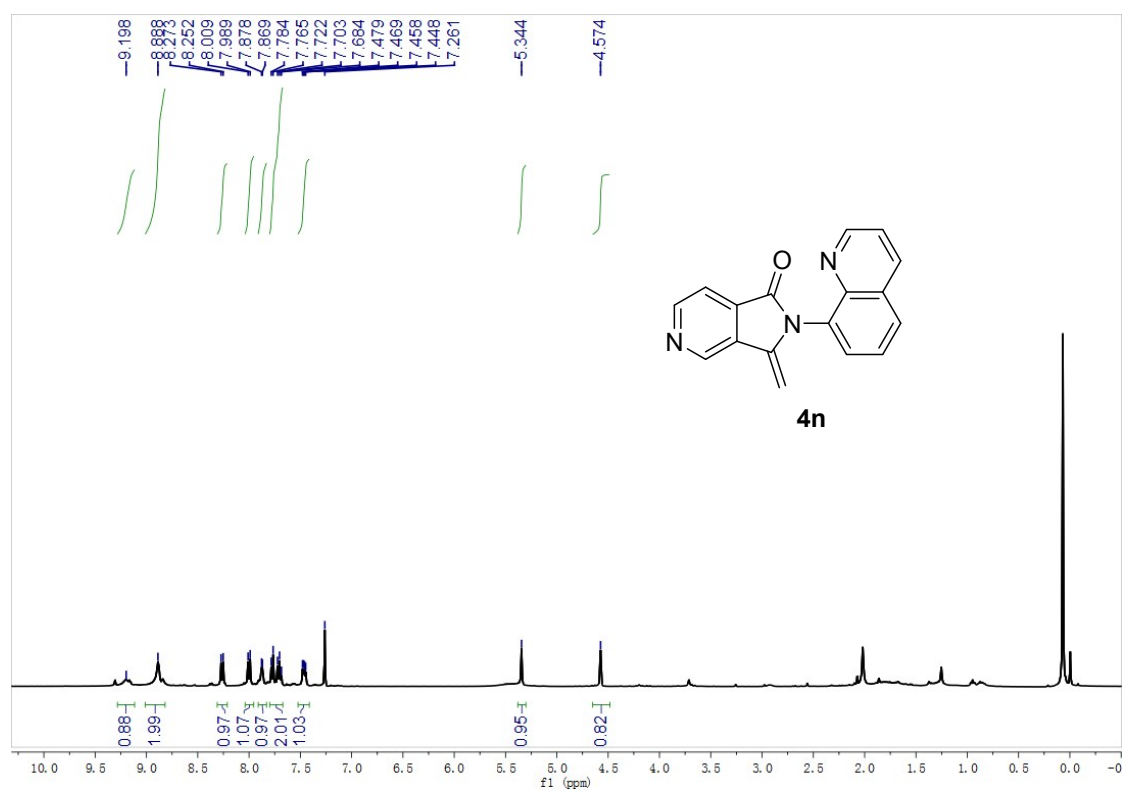

### <sup>13</sup>C NMR Spectrum of **4n**

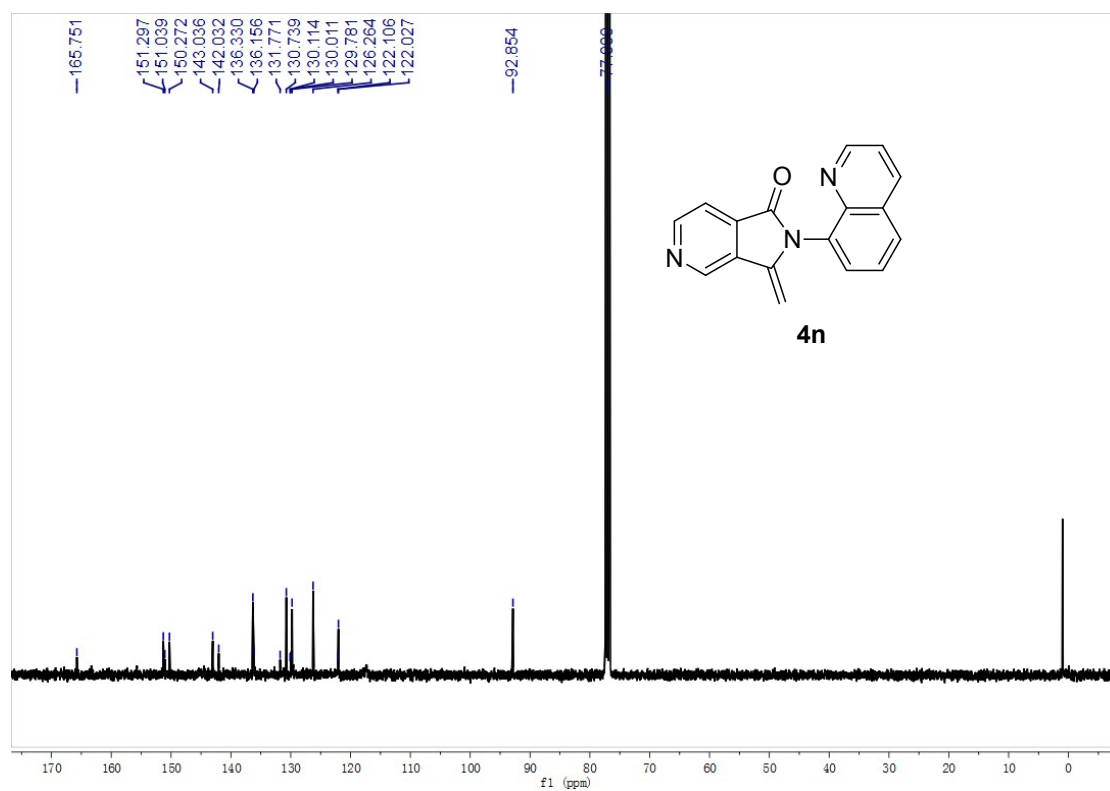

### <sup>1</sup>H NMR Spectrum of 4p

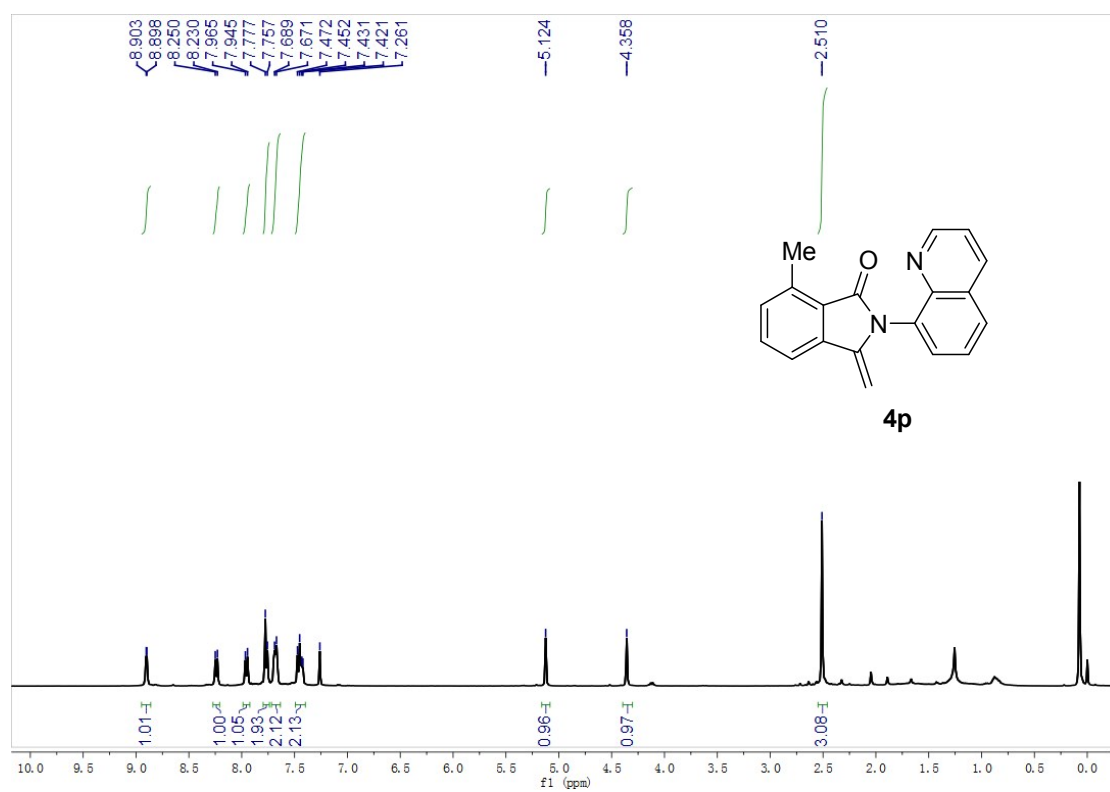

### <sup>13</sup>C NMR Spectrum of 4p

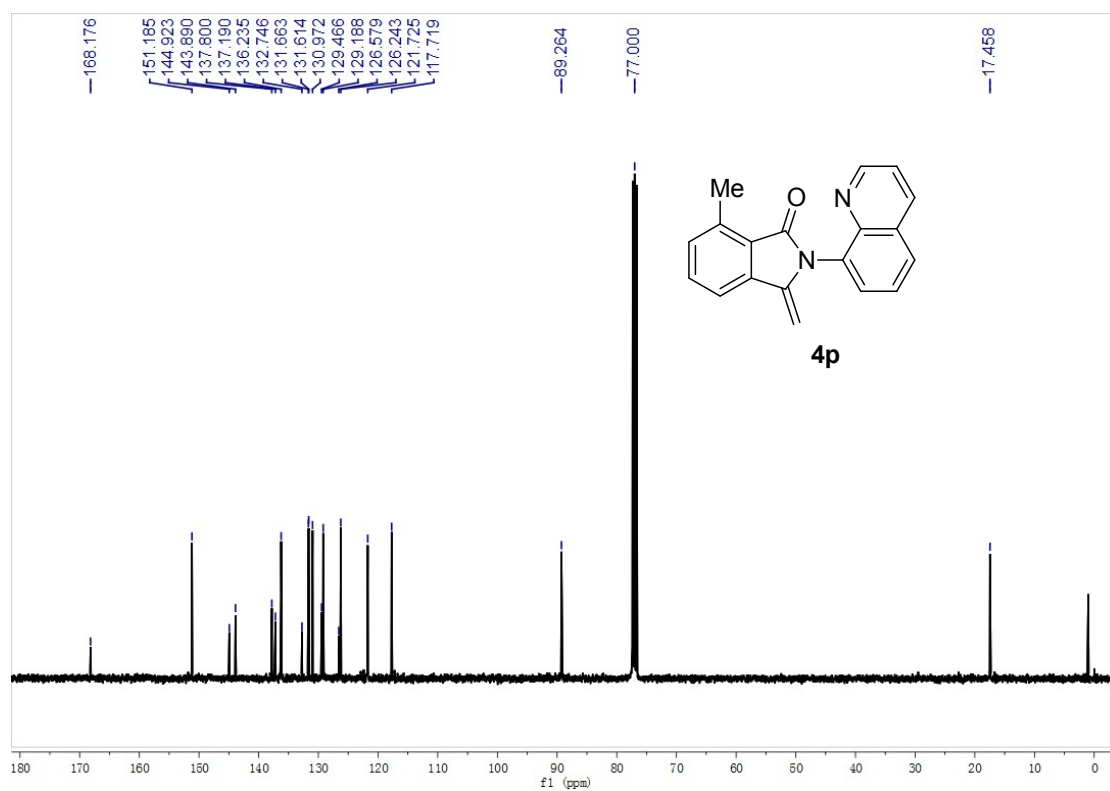

### <sup>1</sup>H NMR Spectrum of 4q

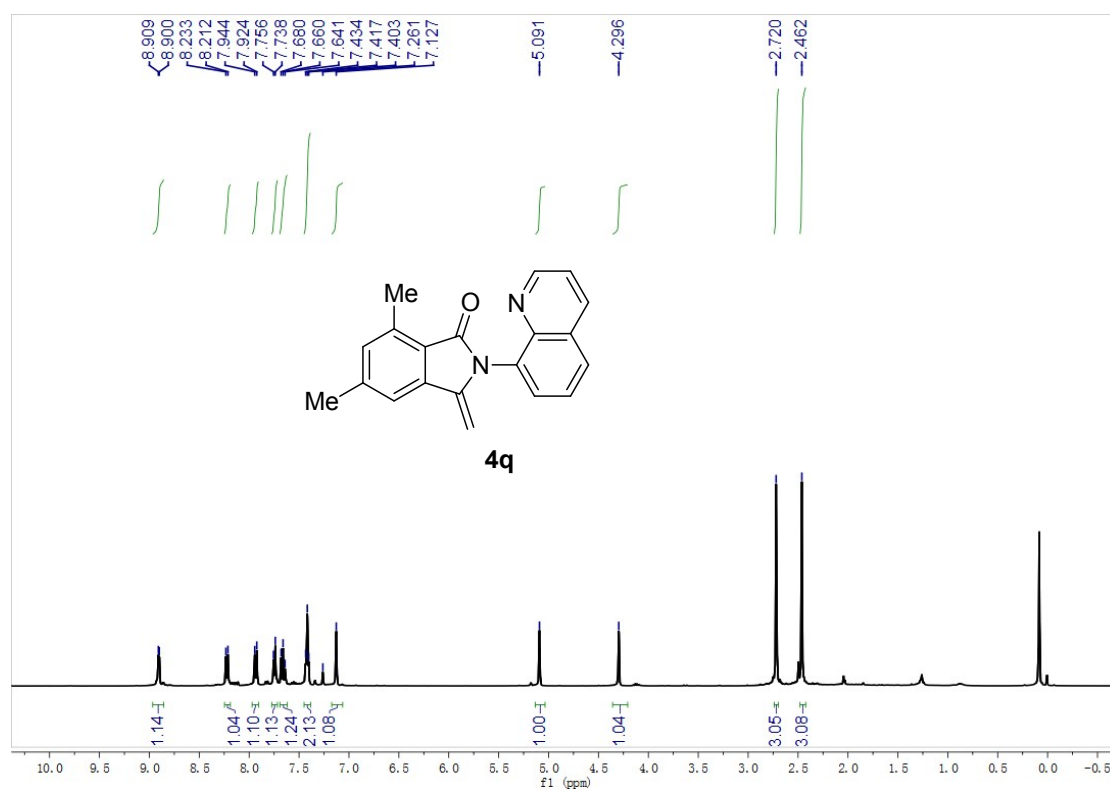

### <sup>13</sup>C NMR Spectrum of 4q

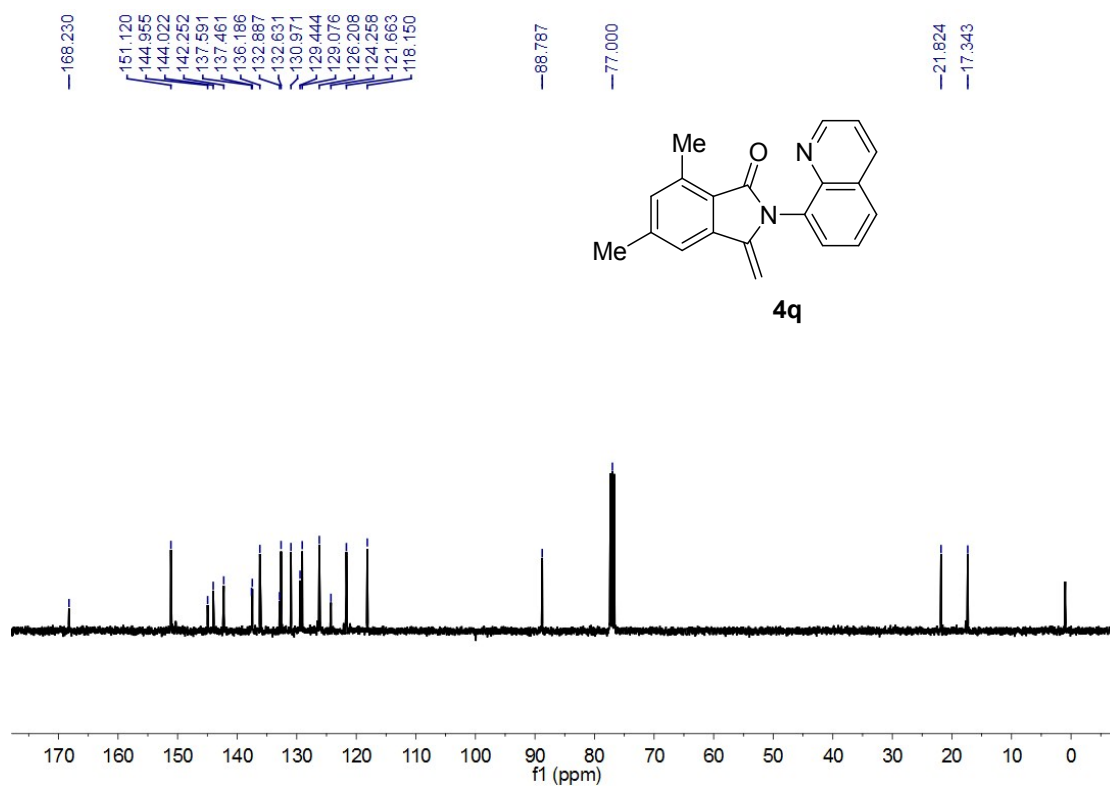

### <sup>1</sup>H NMR Spectrum of **5a** (Z isomer)

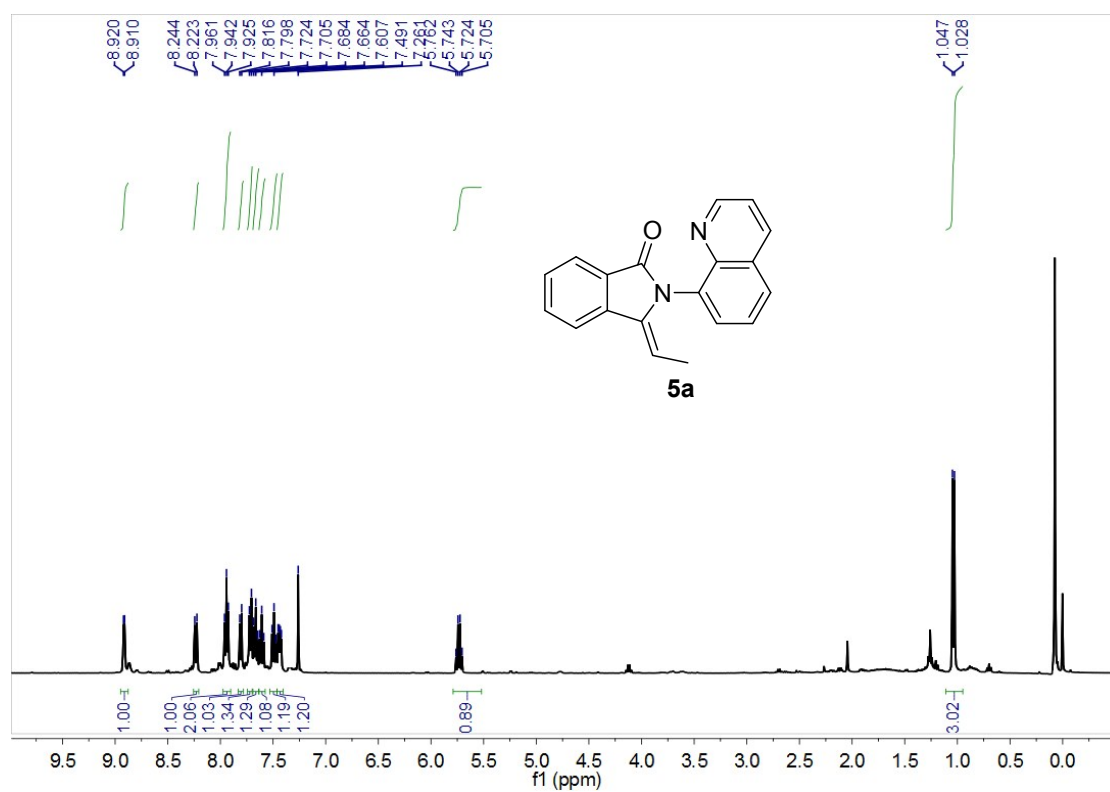

### <sup>13</sup>C NMR Spectrum of **5a** (Z isomer)

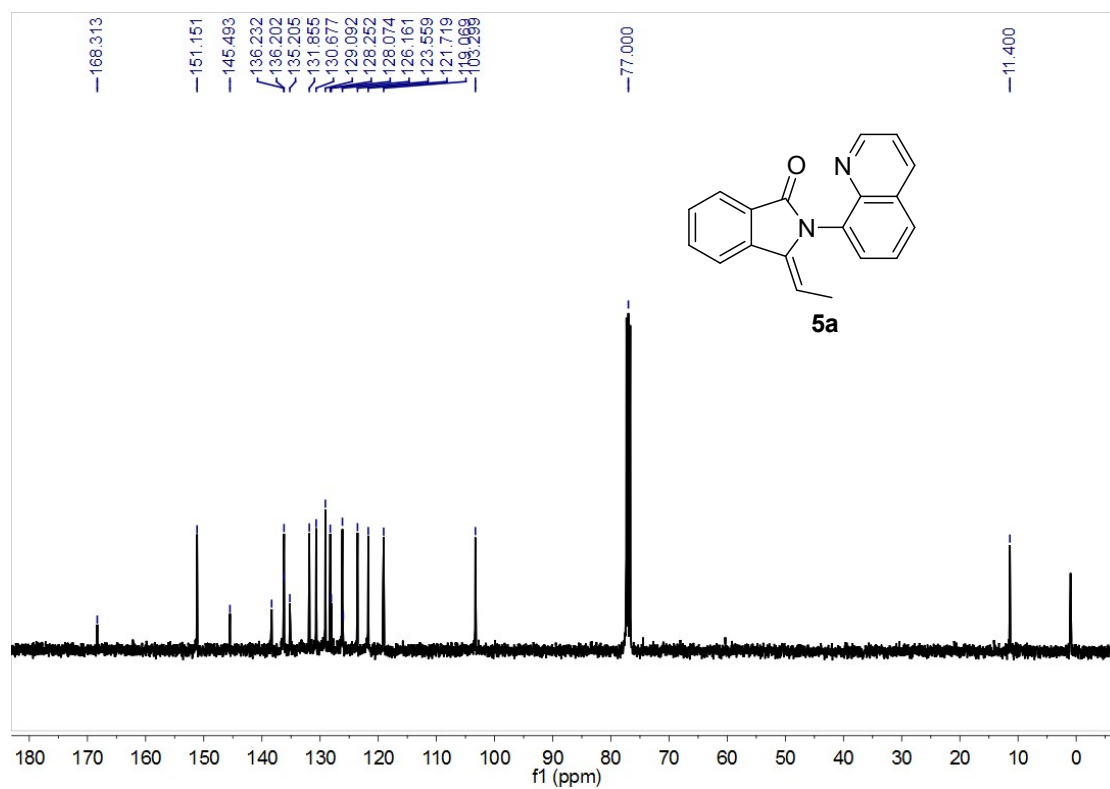

### <sup>1</sup>H NMR Spectrum of 5a (E isomer)

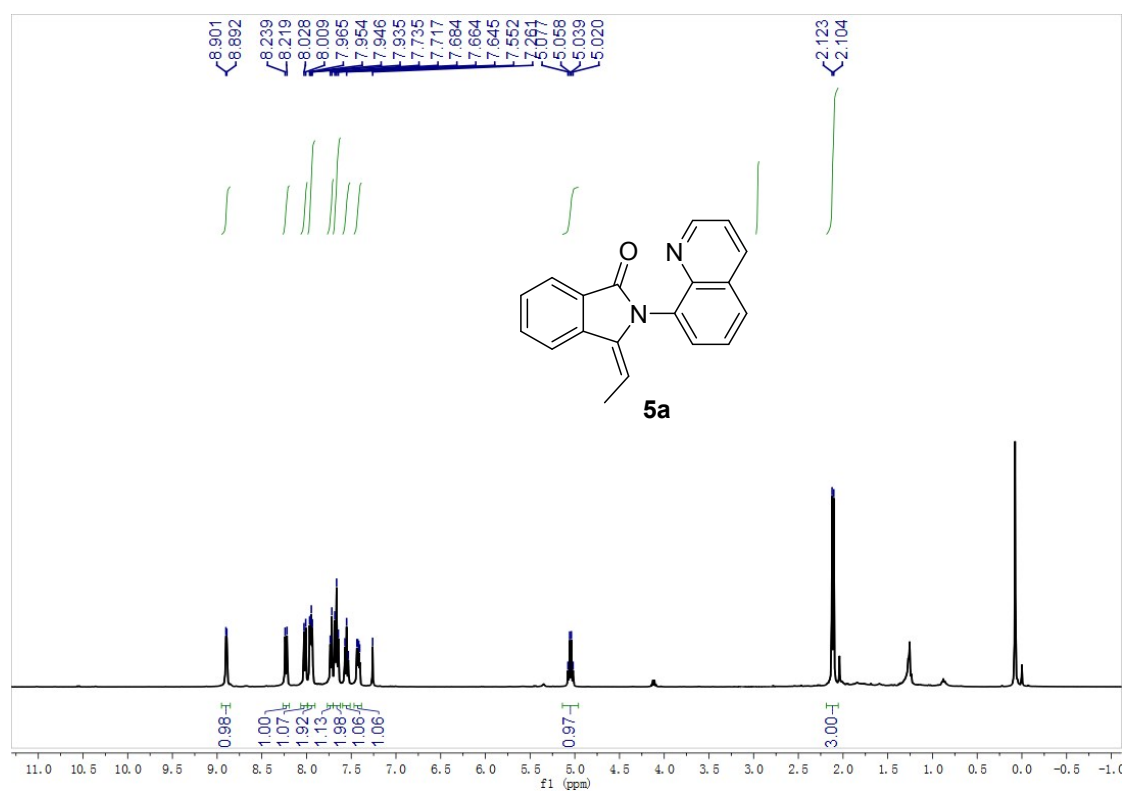

### <sup>13</sup>C NMR Spectrum of 5a (E isomer)

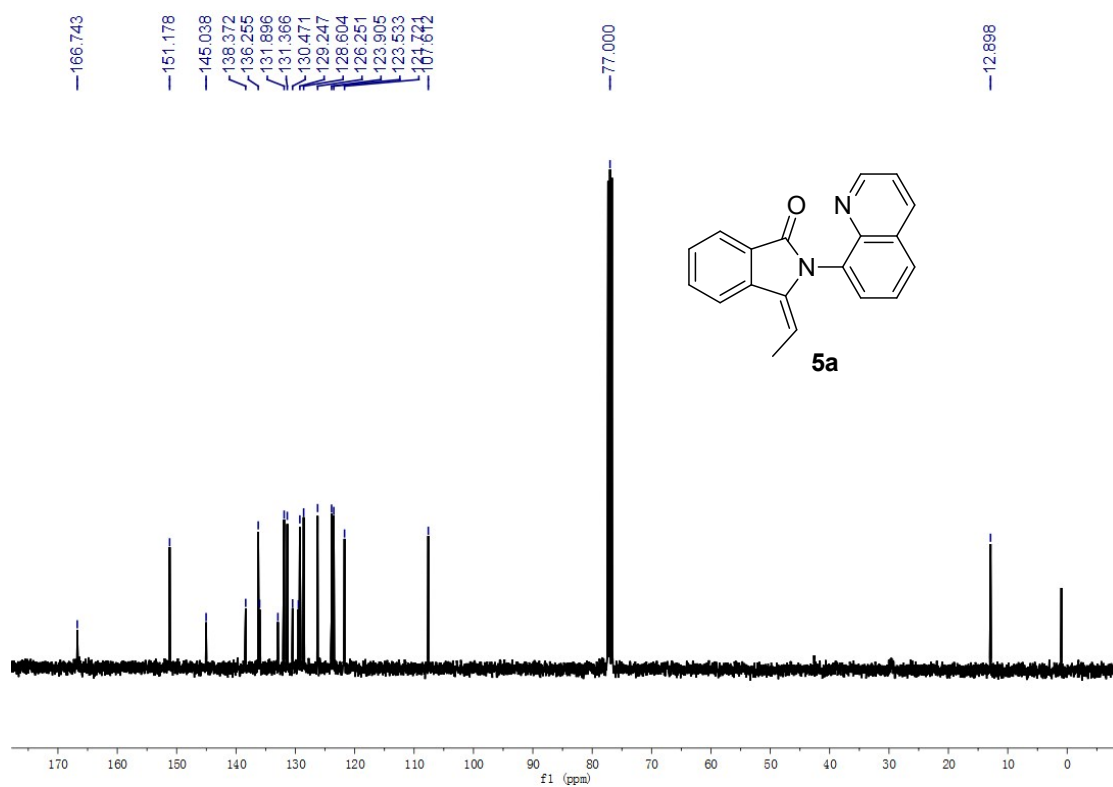

### <sup>1</sup>H NMR Spectrum of **5b** (Z isomer)

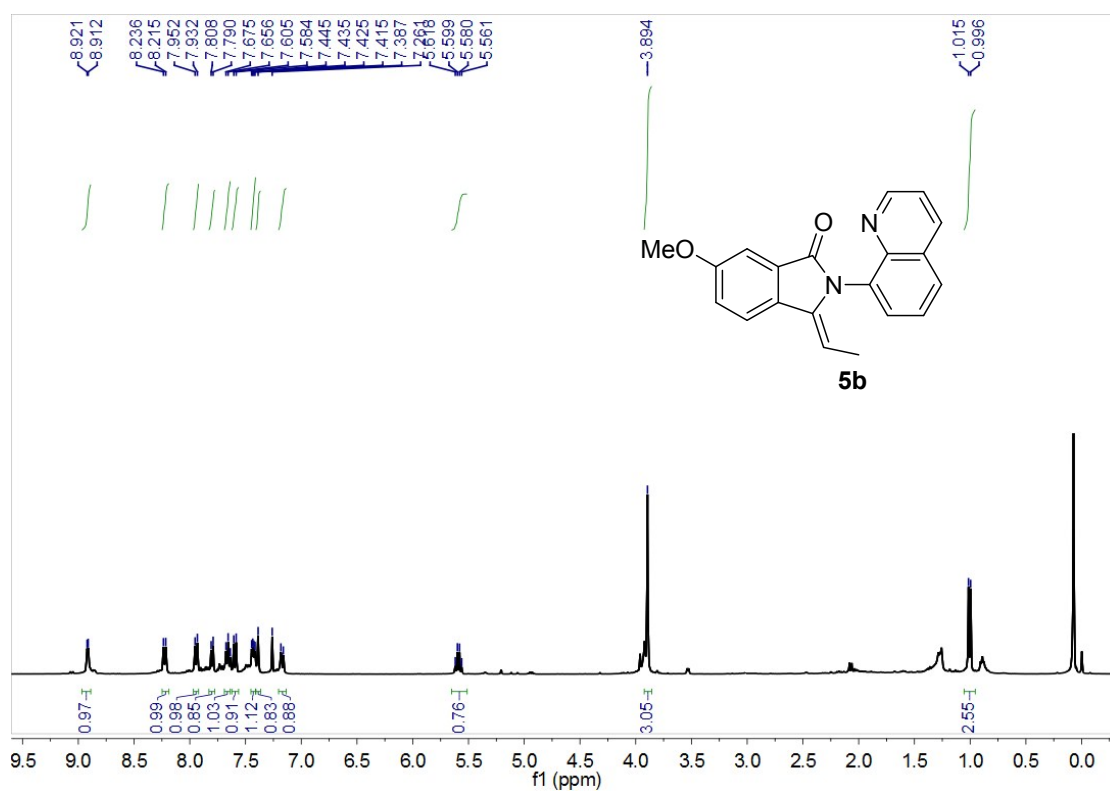

### <sup>13</sup>C NMR Spectrum of **5b** (Z isomer)

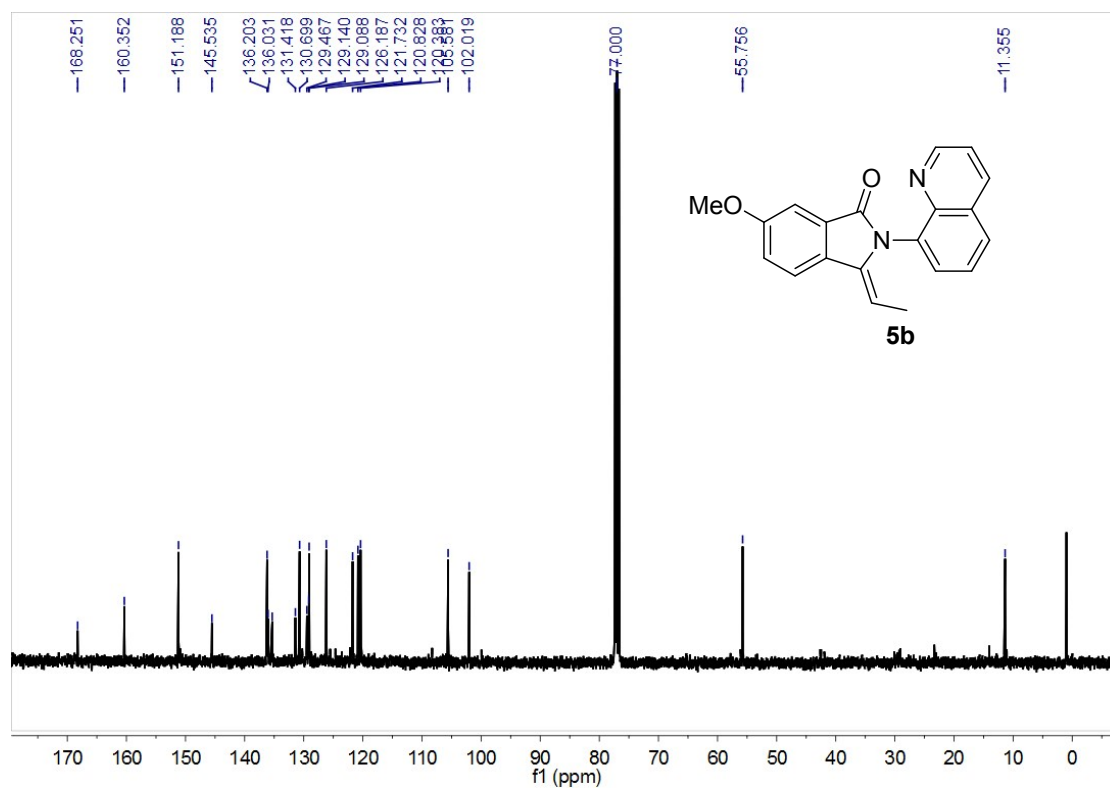



### <sup>1</sup>H NMR Spectrum of **5b** (E isomer)

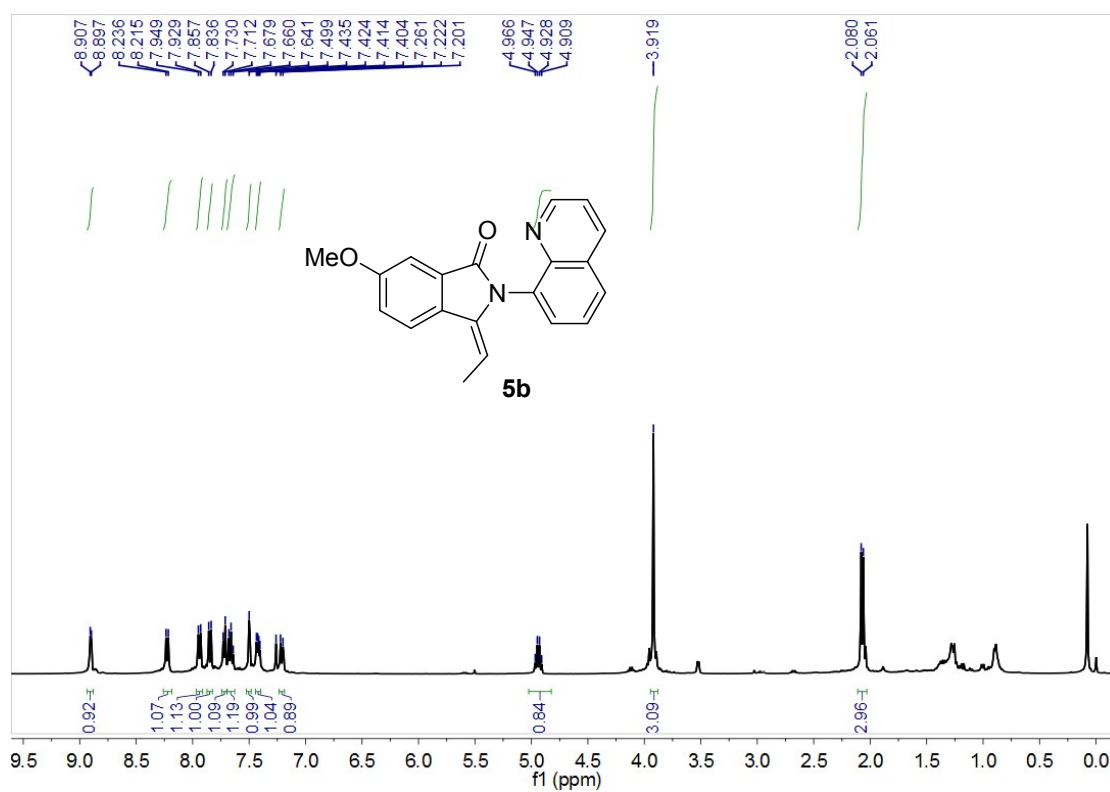

### <sup>13</sup>C NMR Spectrum of **5b** (E isomer)

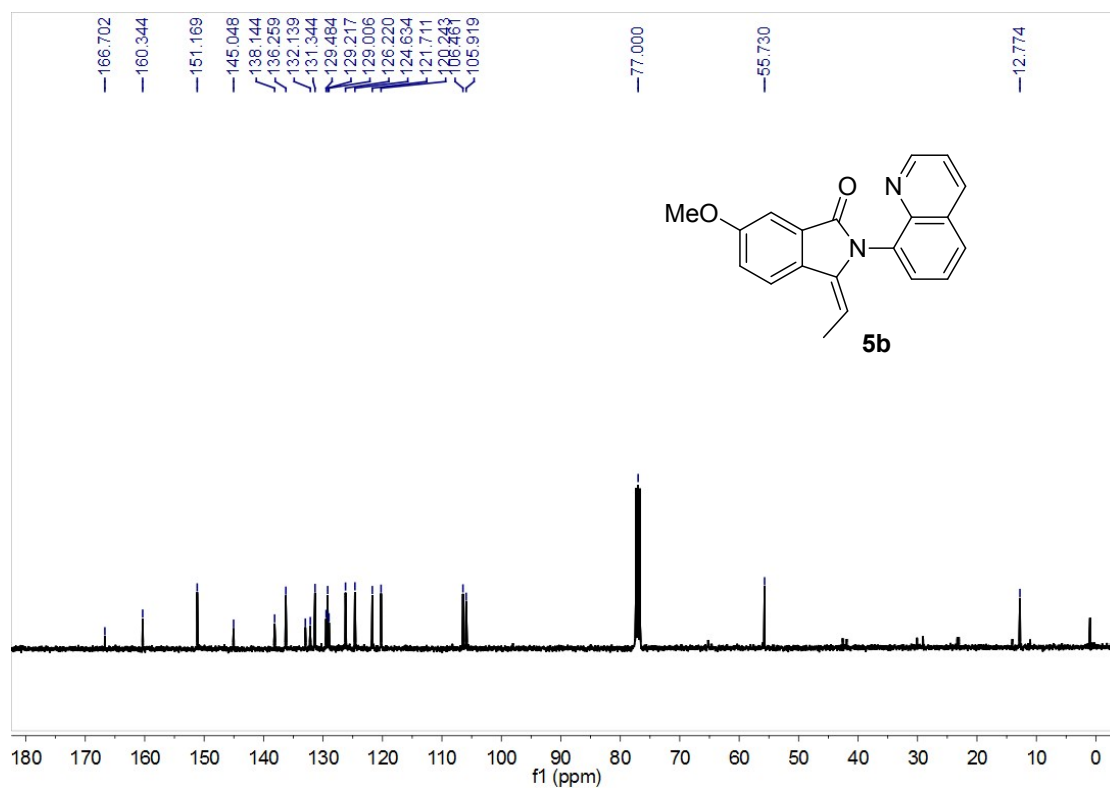

### <sup>1</sup>H NMR Spectrum of 5c (Z isomer)

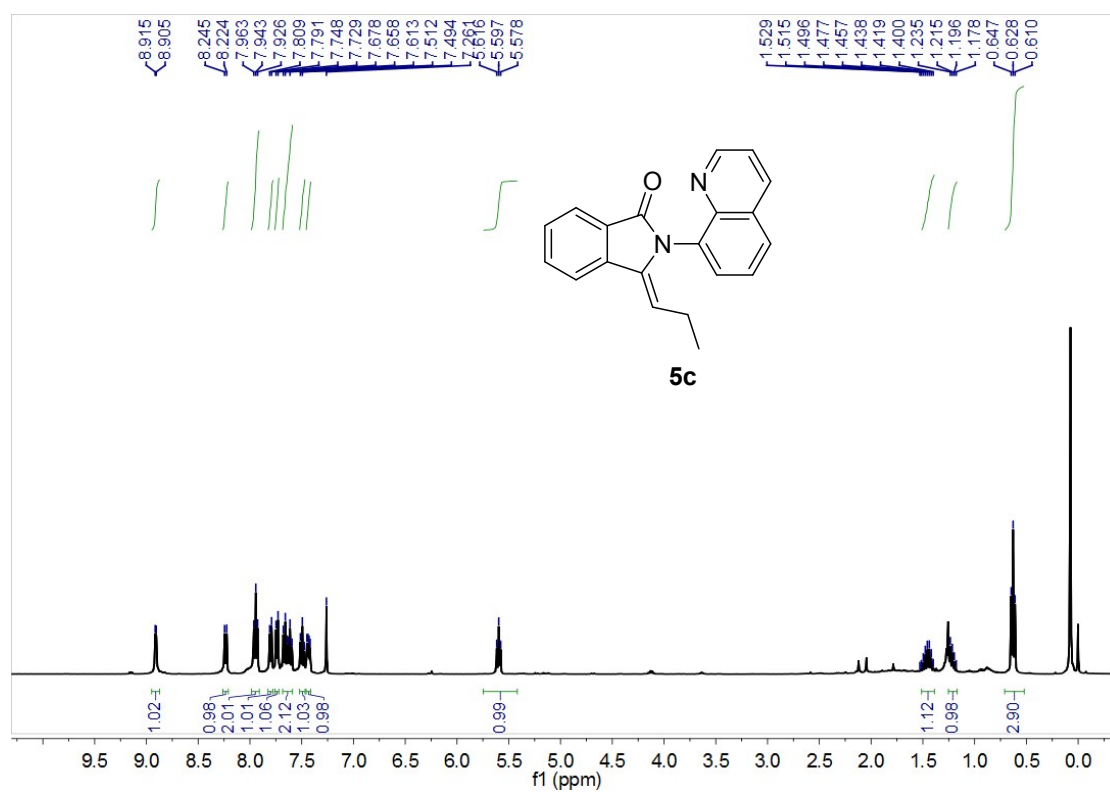

### <sup>13</sup>C NMR Spectrum of 5c (Z isomer)

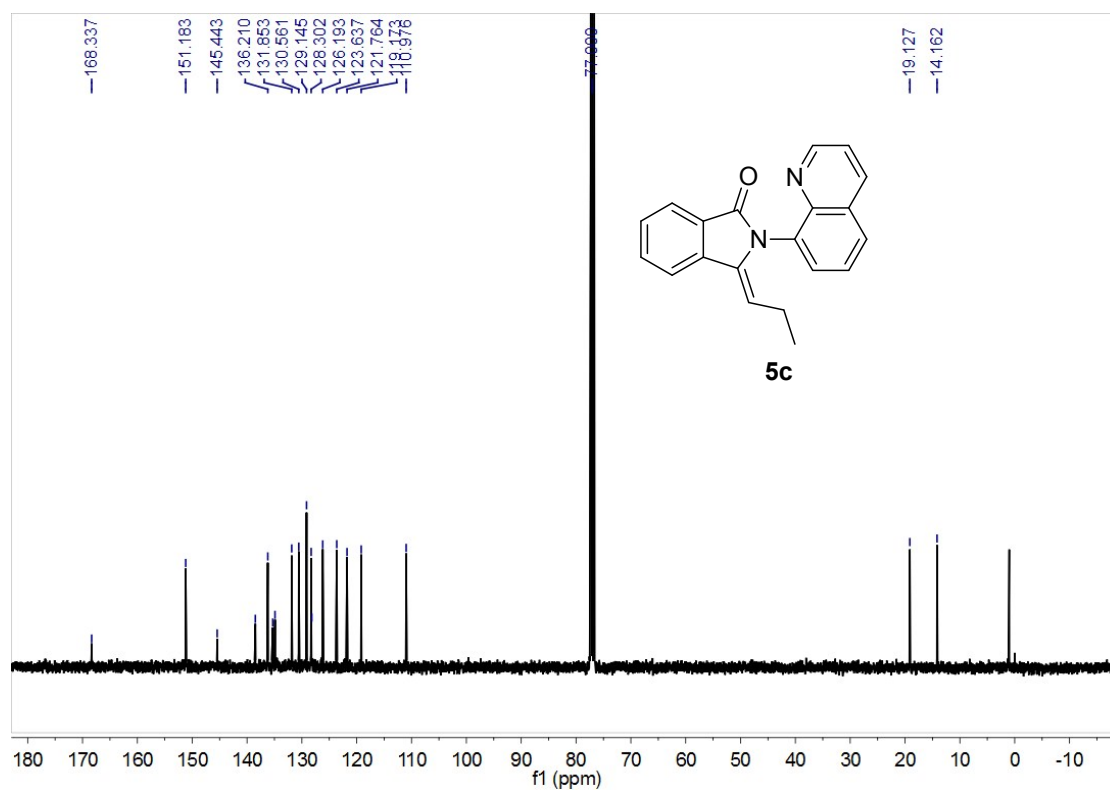

### <sup>1</sup>H NMR Spectrum of **5c** (E isomer)

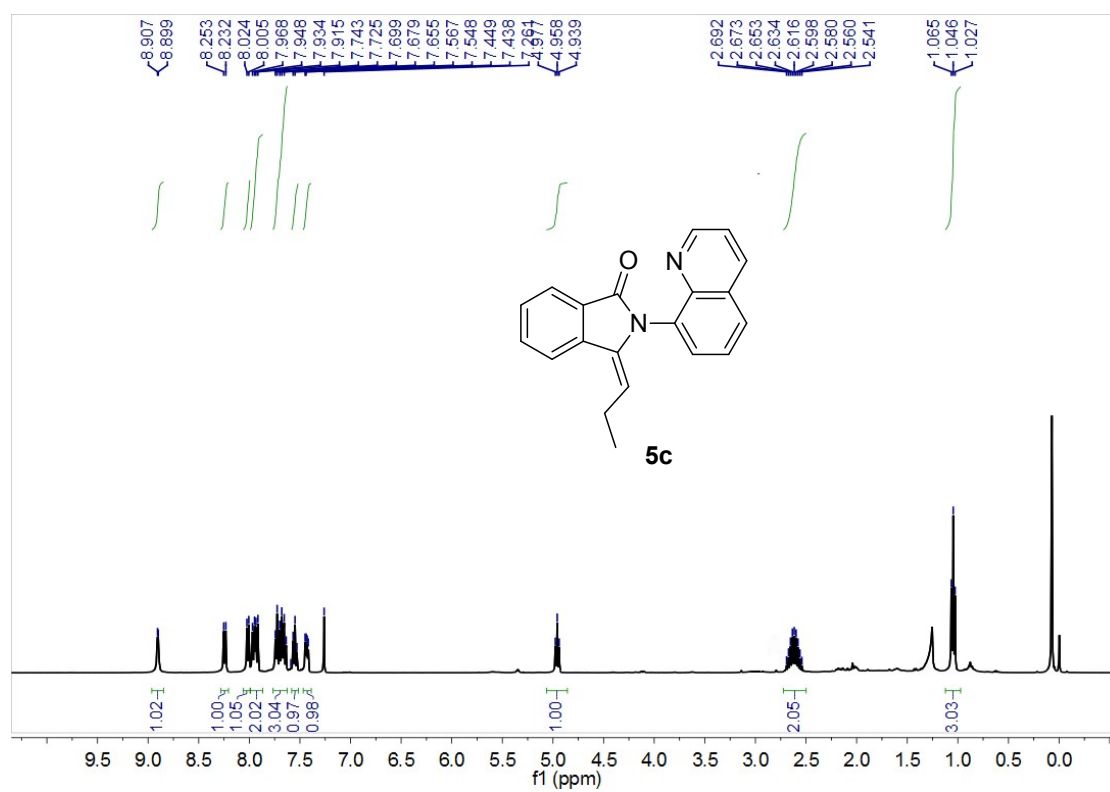

### <sup>13</sup>C NMR Spectrum of **5c** (E isomer)

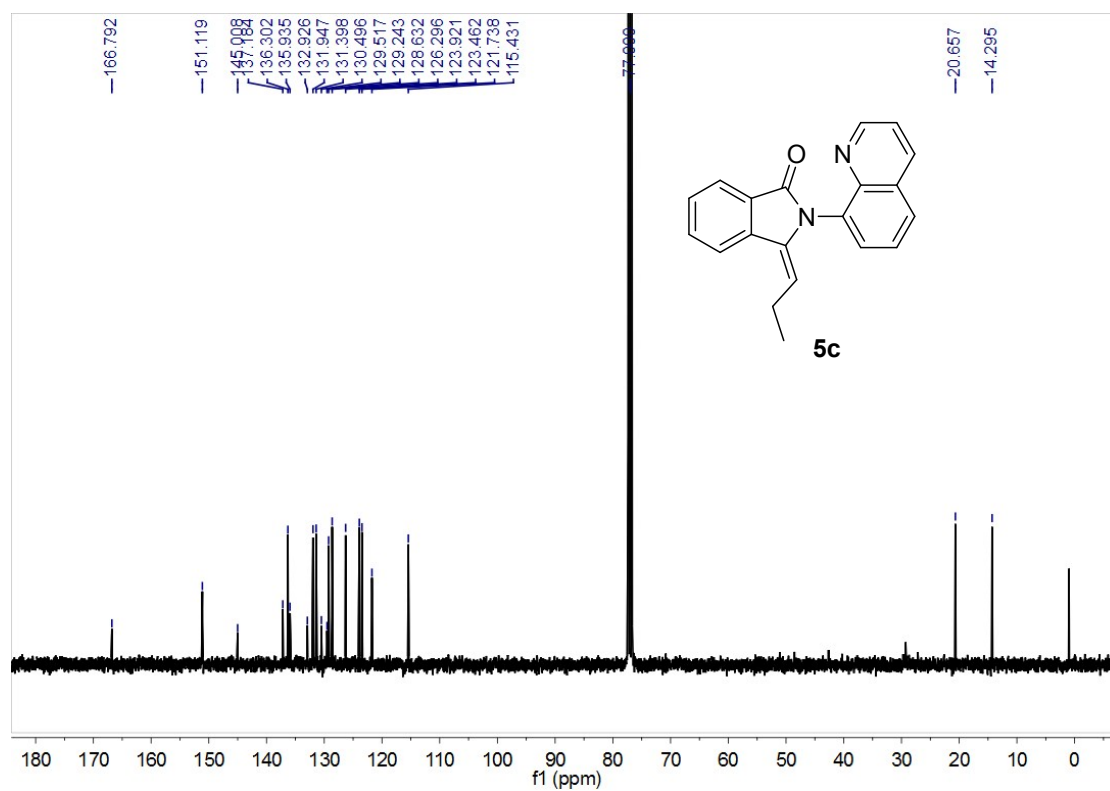

### <sup>1</sup>H NMR Spectrum of **5d** (Z isomer)

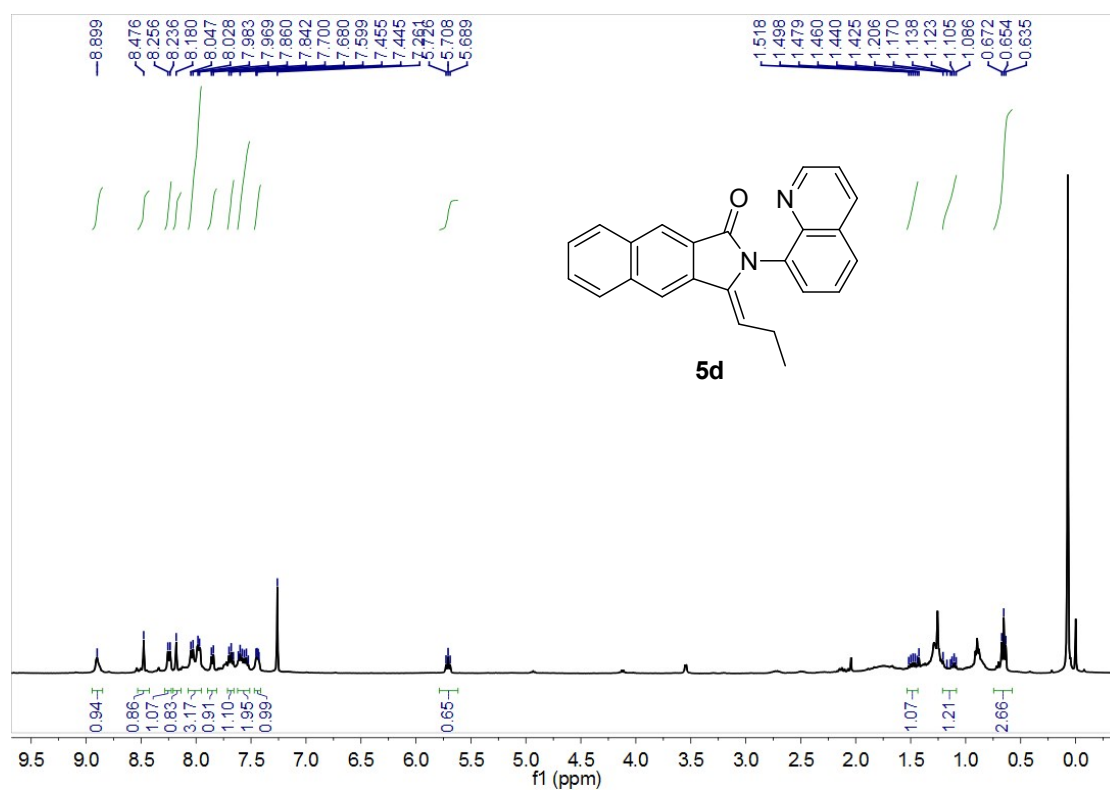

### <sup>13</sup>C NMR Spectrum of **5d** (Z isomer)

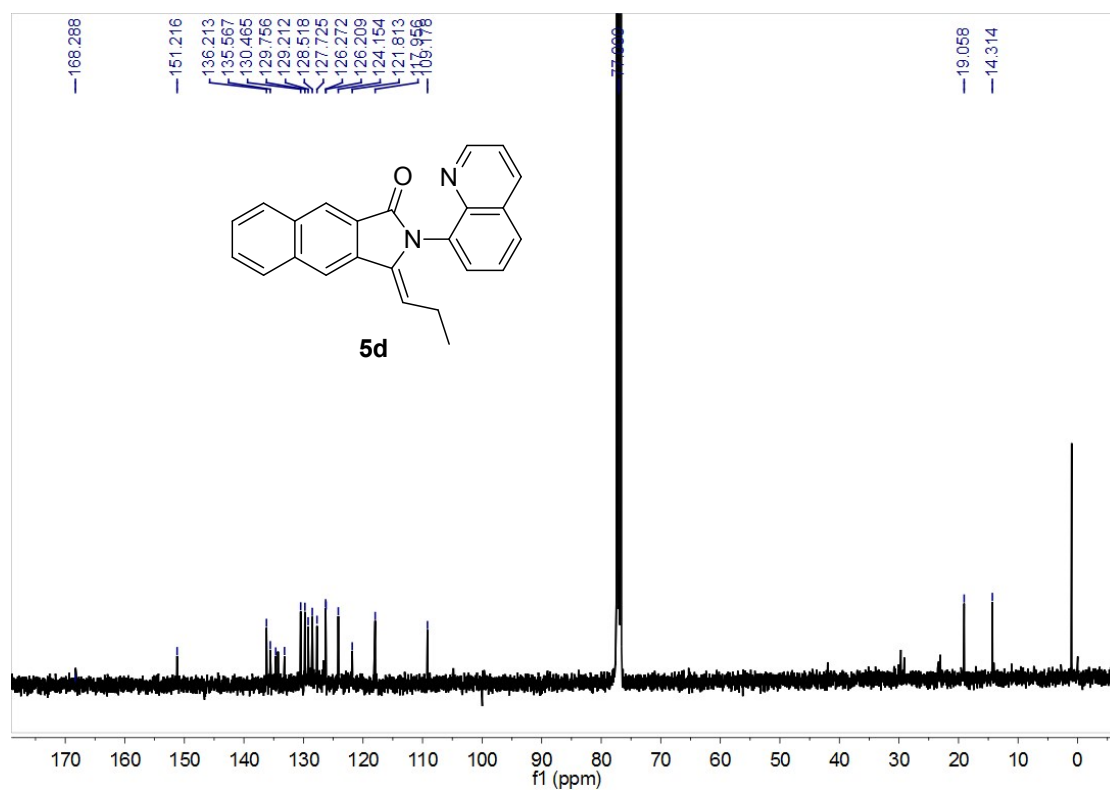

### <sup>1</sup>H NMR Spectrum of **5d** (E isomer)

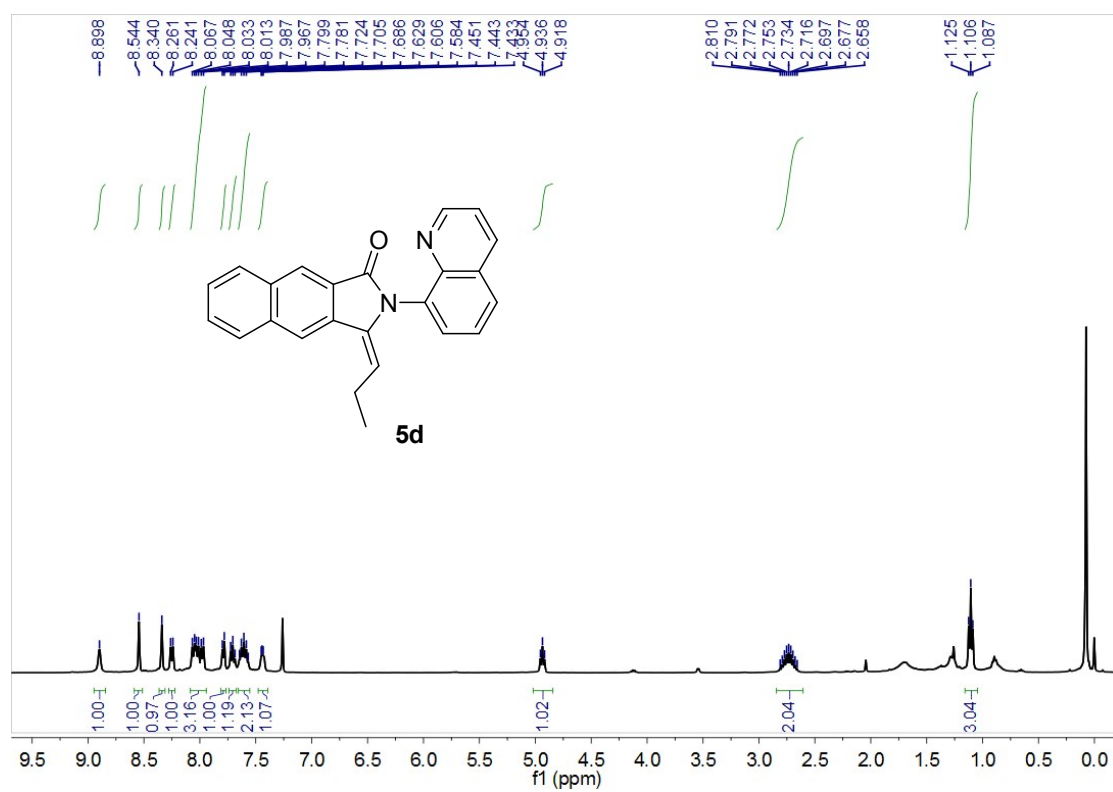

### <sup>13</sup>C NMR Spectrum of **5d** (E isomer)

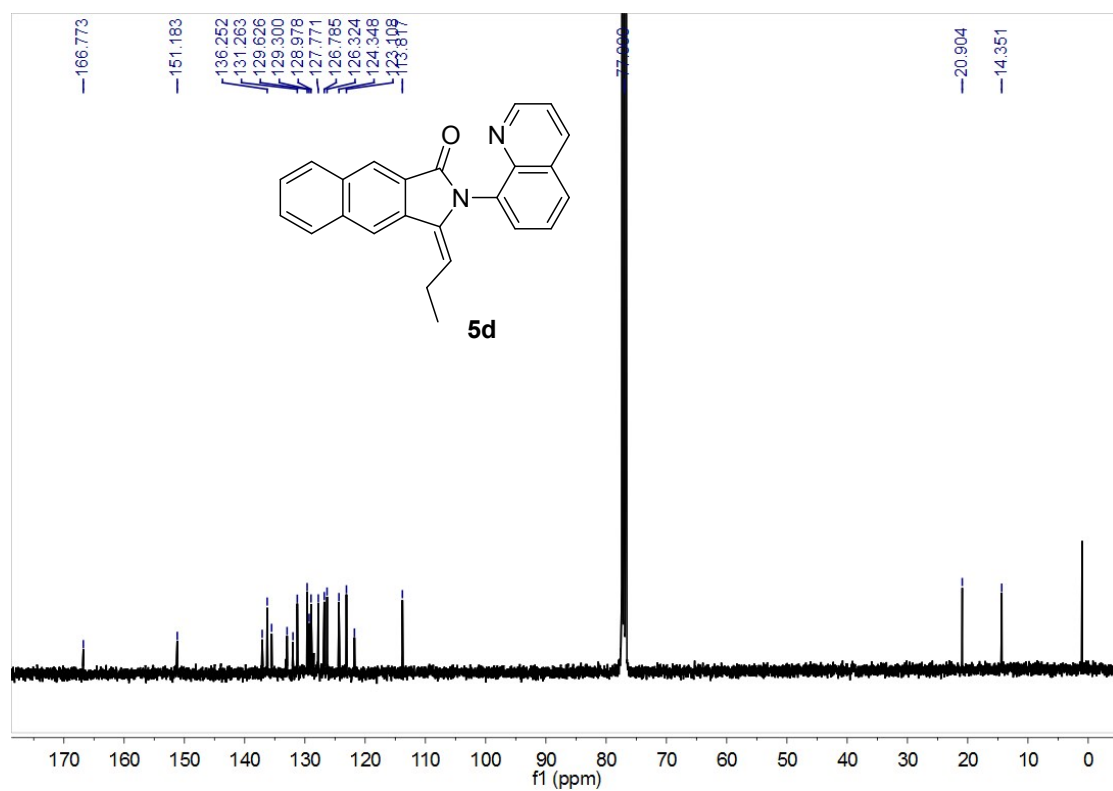

### <sup>1</sup>H NMR Spectrum of 5e (Z isomer)

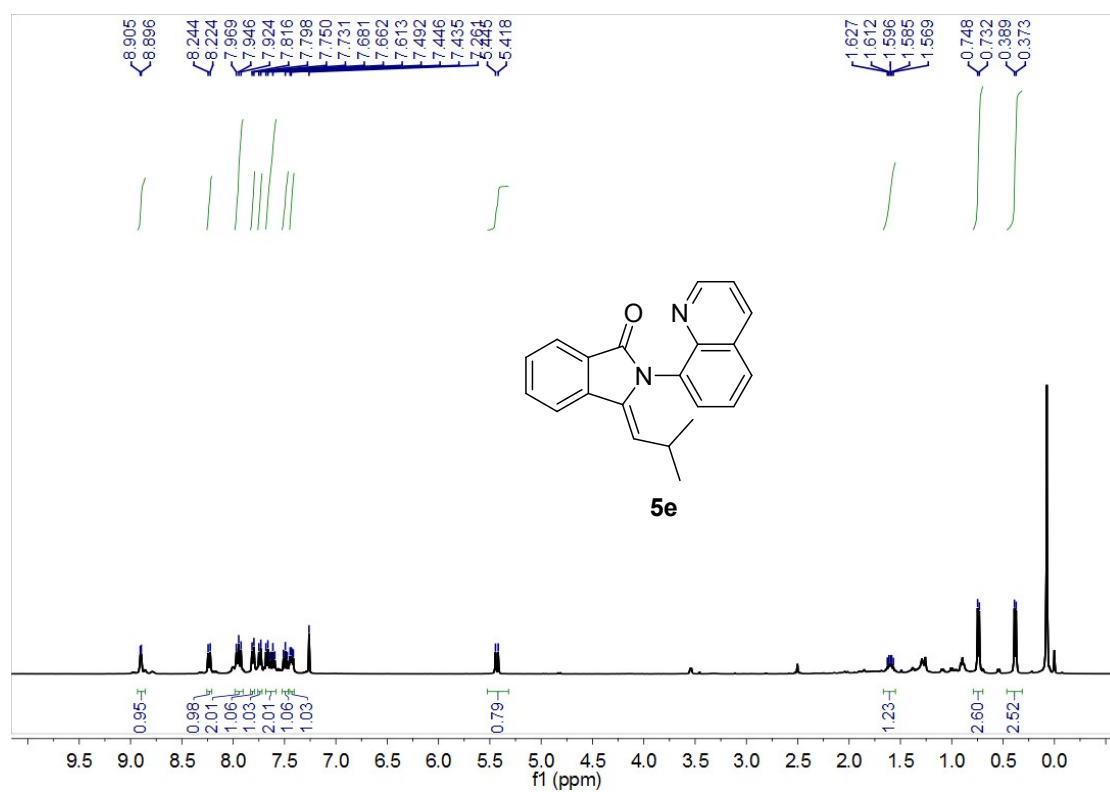

### <sup>13</sup>C NMR Spectrum of 5e (Z isomer)

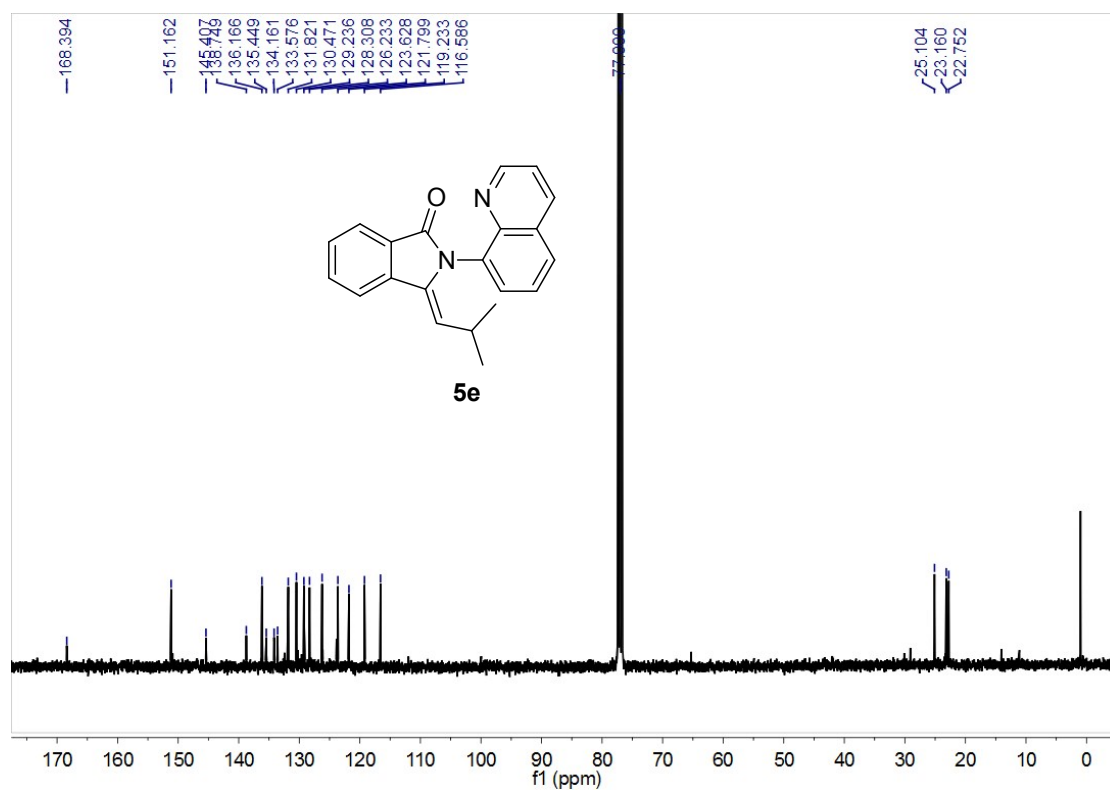

### <sup>1</sup>H NMR Spectrum of **5e** (E isomer)

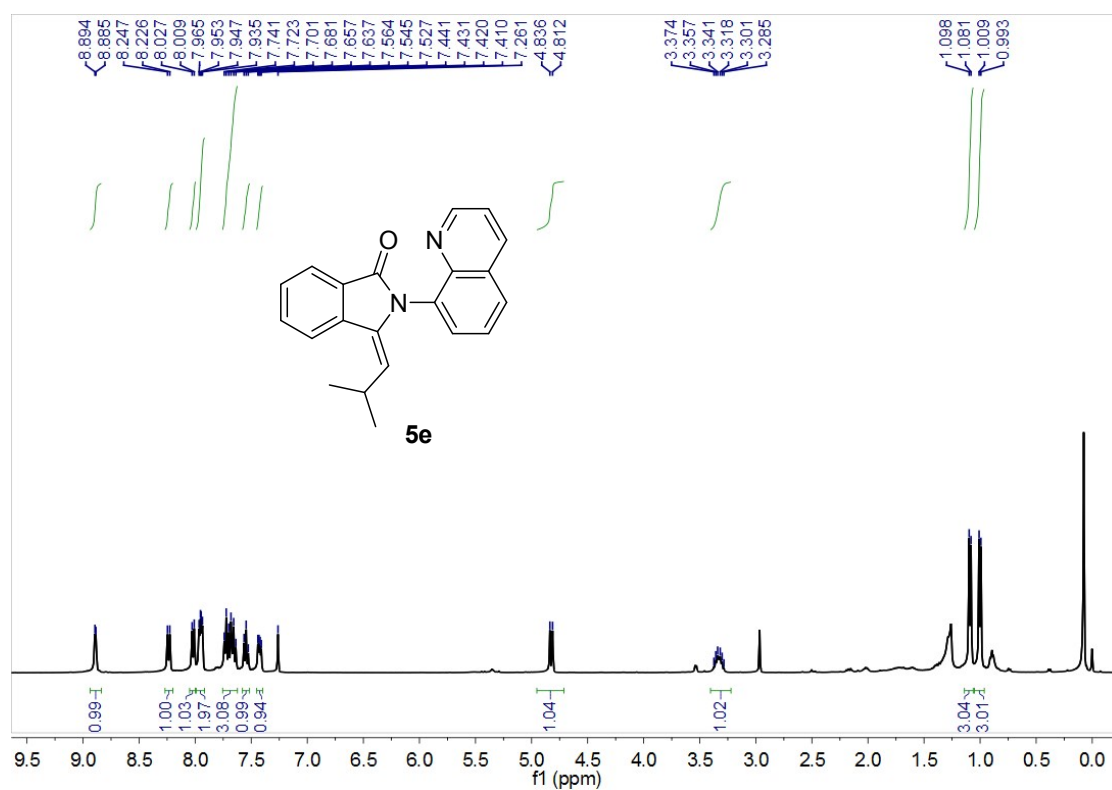

### <sup>13</sup>C NMR Spectrum of **5e** (E isomer)

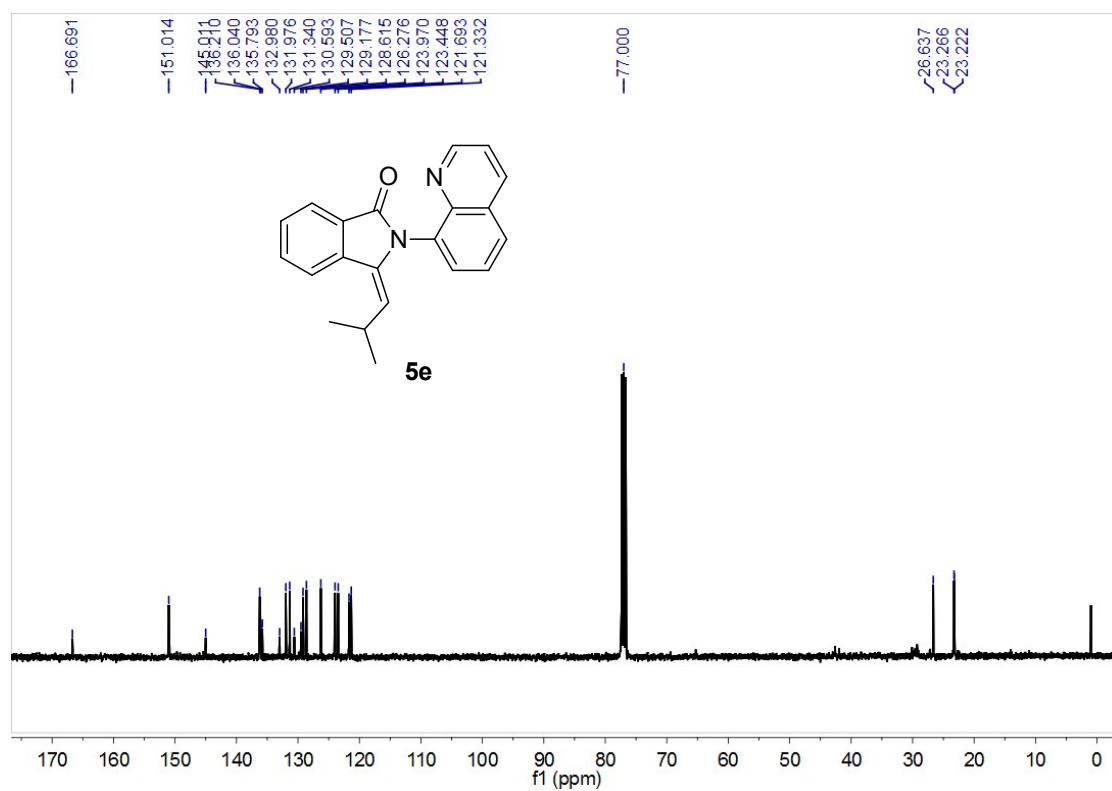

### <sup>1</sup>H NMR Spectrum of **5f** (Z isomer)

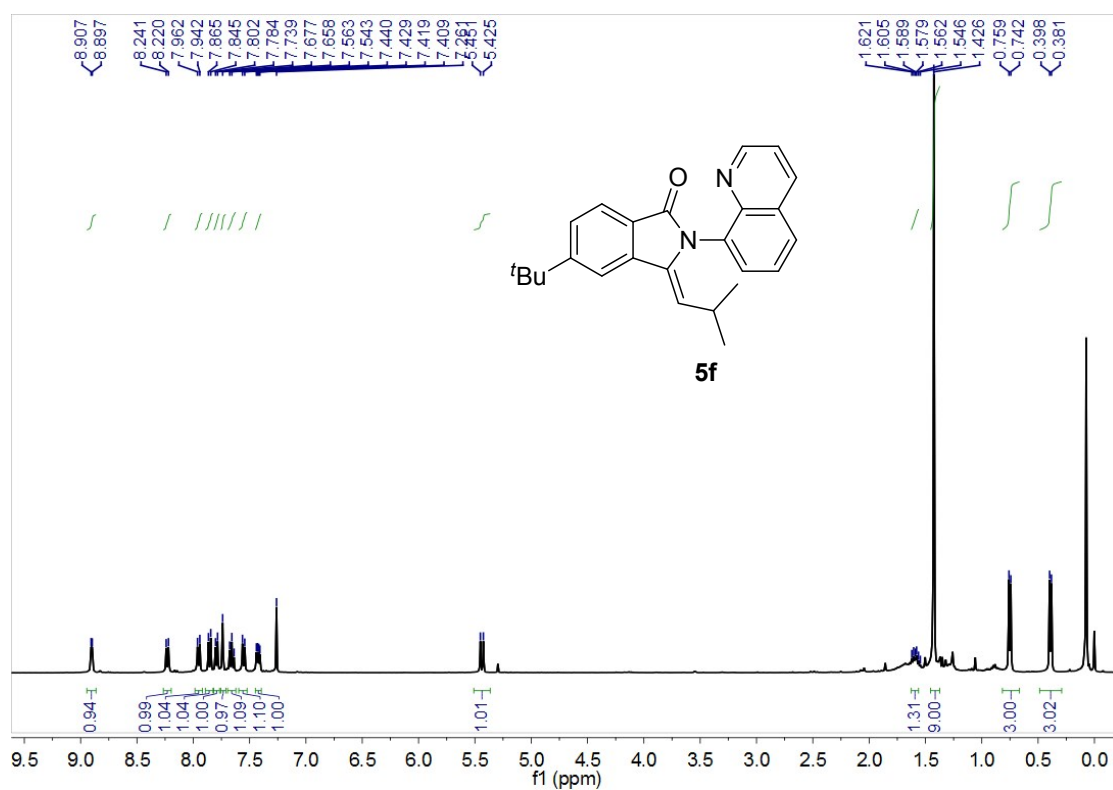

### <sup>13</sup>C NMR Spectrum of **5f** (Z isomer)

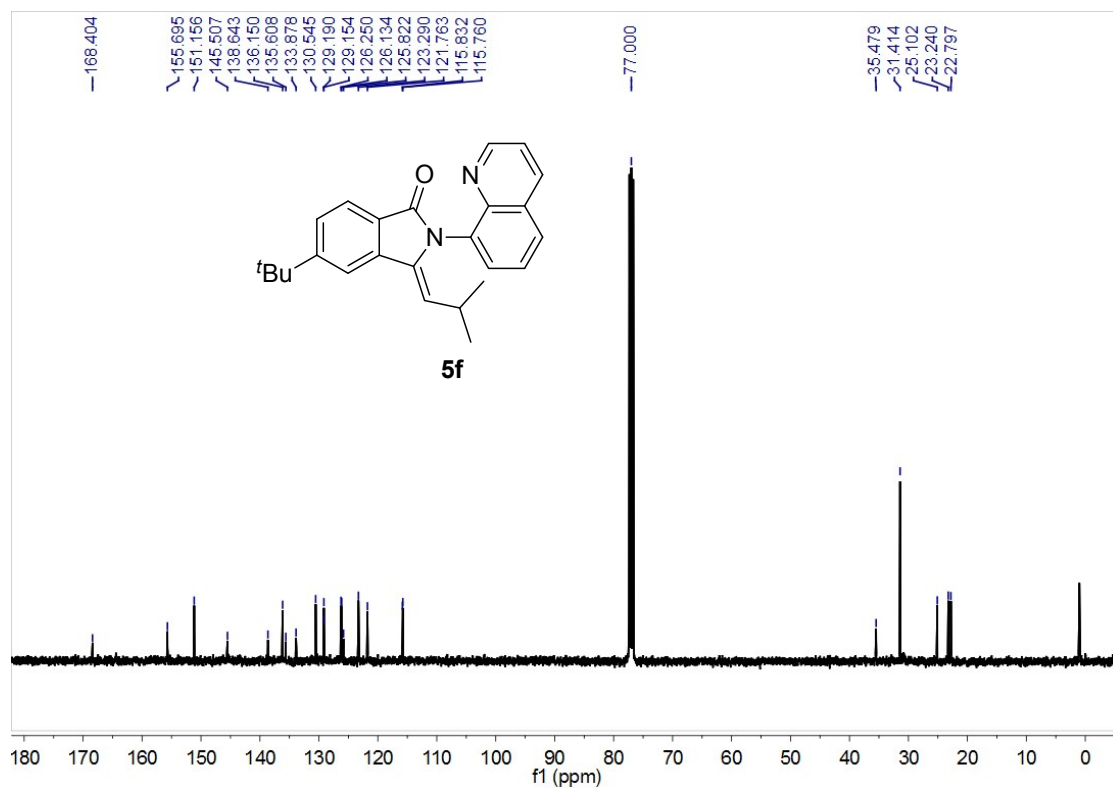



### <sup>1</sup>H NMR Spectrum of **5f** (E isomer)

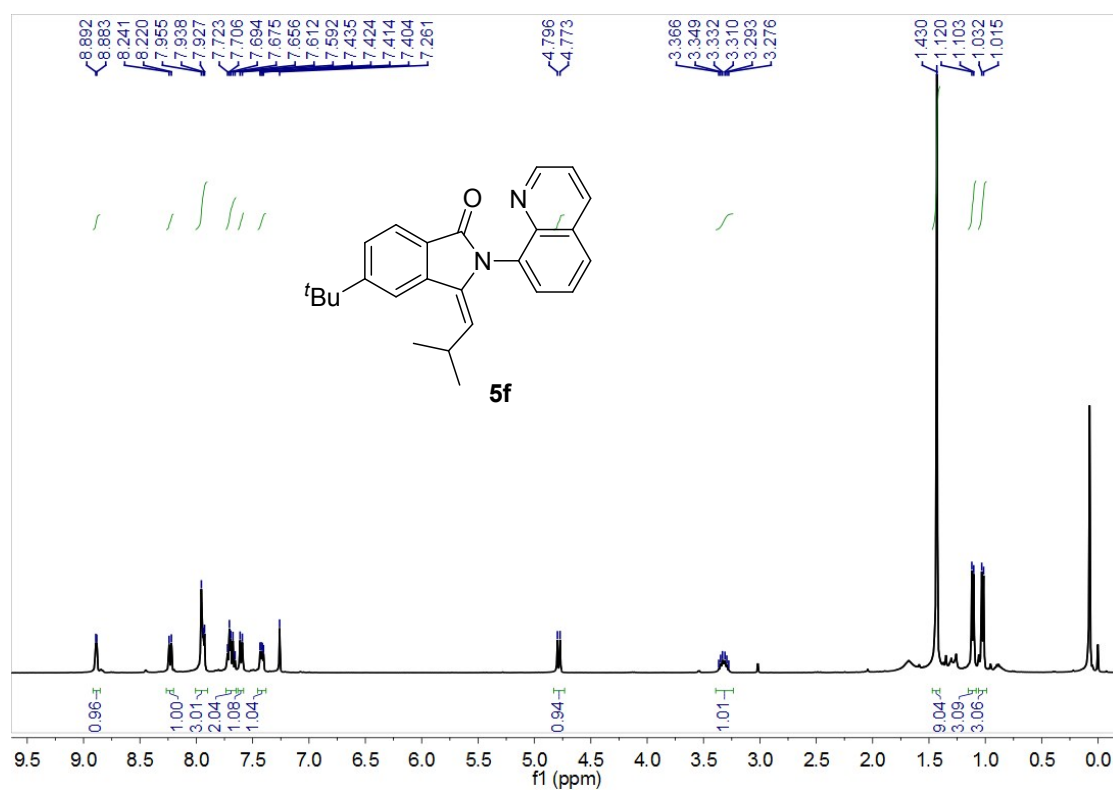

### <sup>13</sup>C NMR Spectrum of **5f** (E isomer)

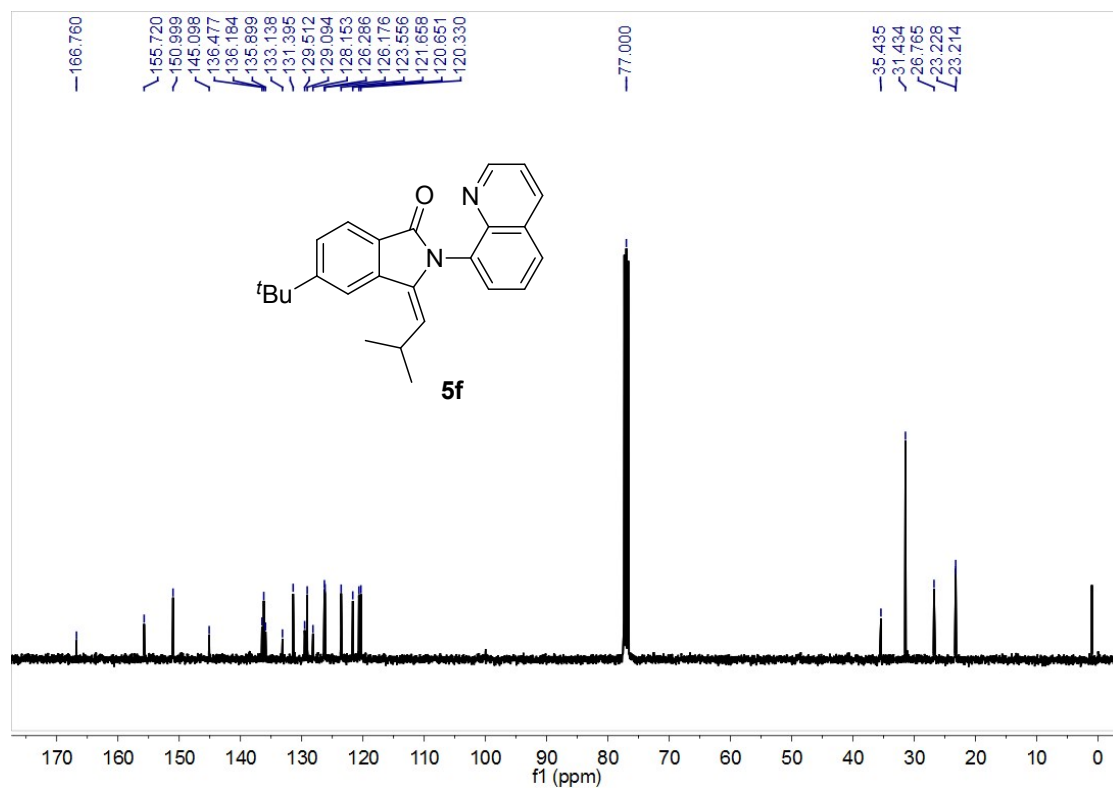

### <sup>1</sup>H NMR Spectrum of **5g** (**Z isomer**)

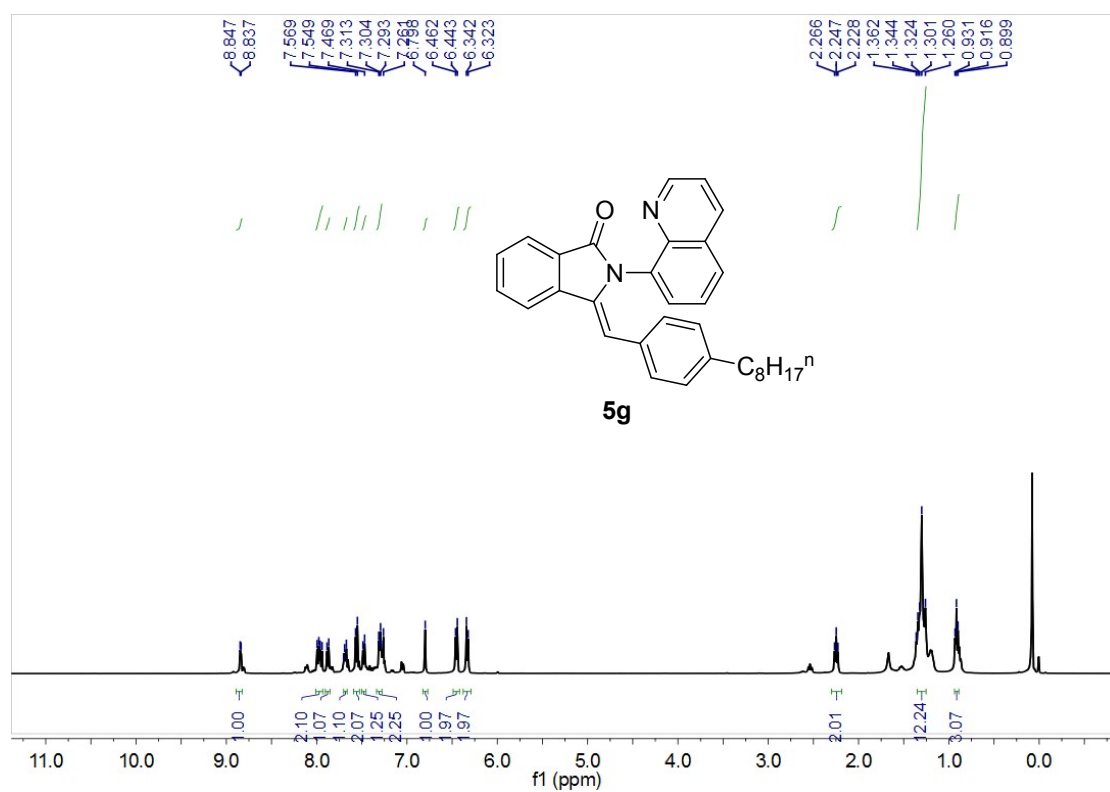

### <sup>13</sup>C NMR Spectrum of **5g** (**Z isomer**)

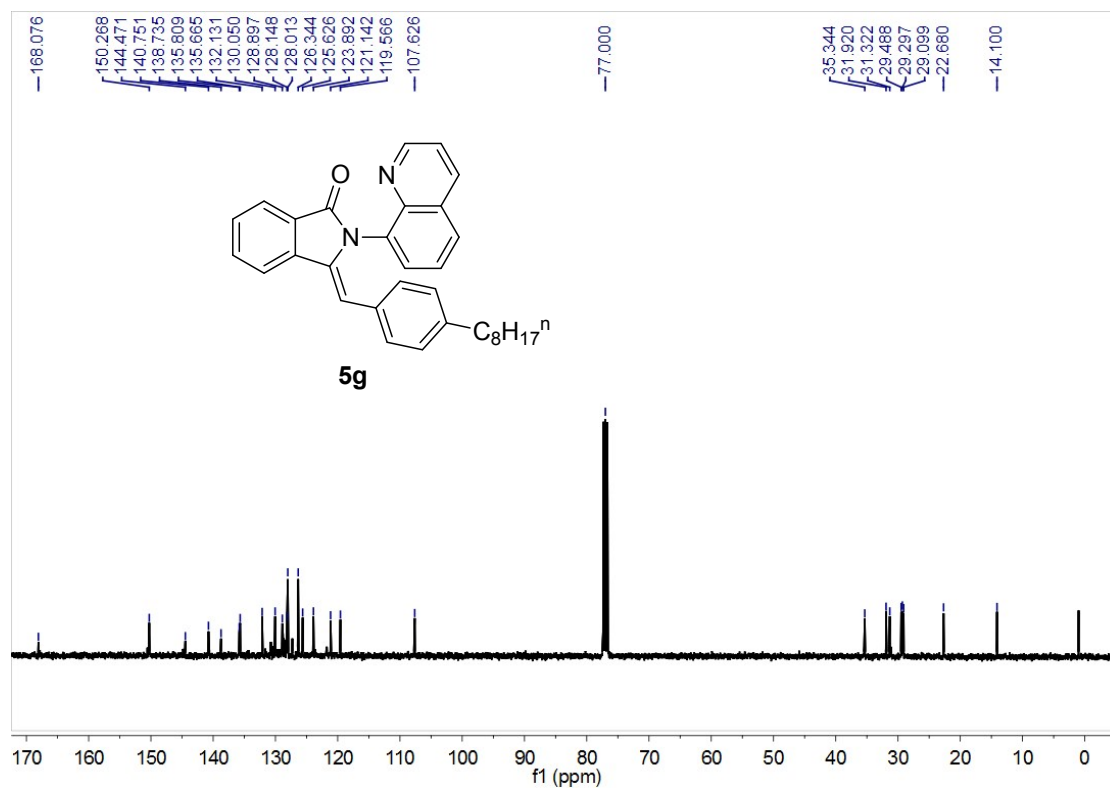

### <sup>1</sup>H NMR Spectrum of **5g** (E isomer)

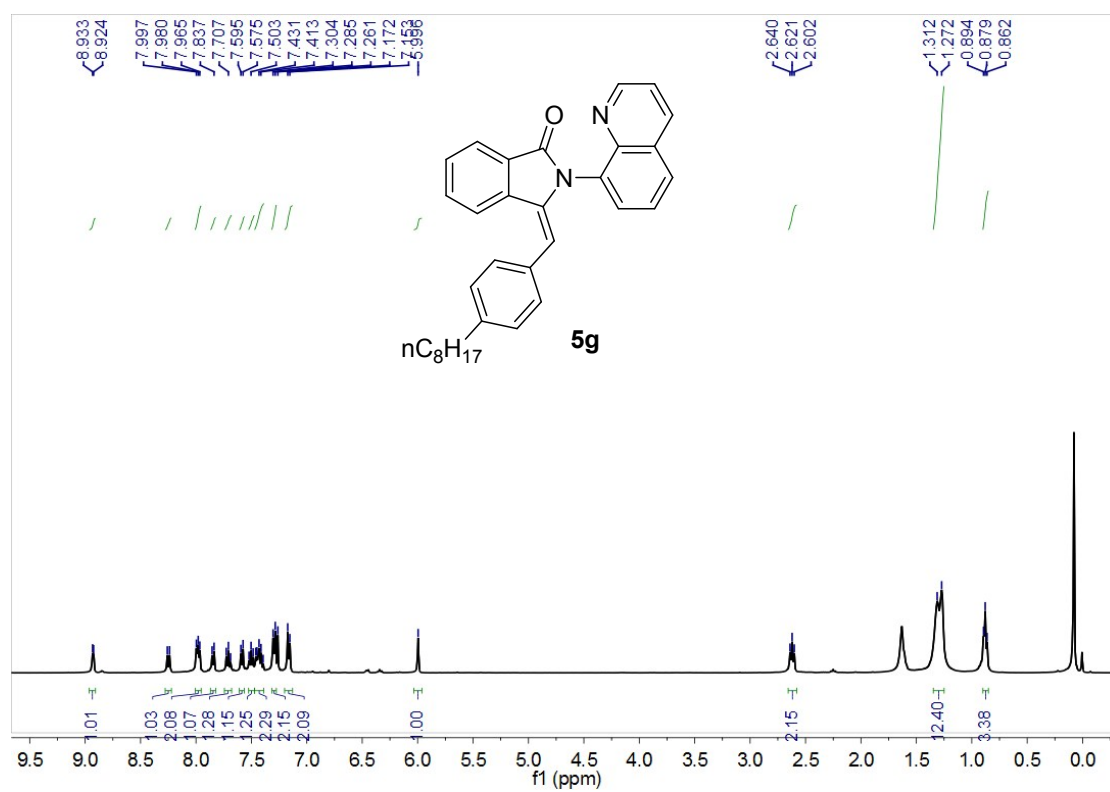

### <sup>13</sup>C NMR Spectrum of **5g** (Z isomer)

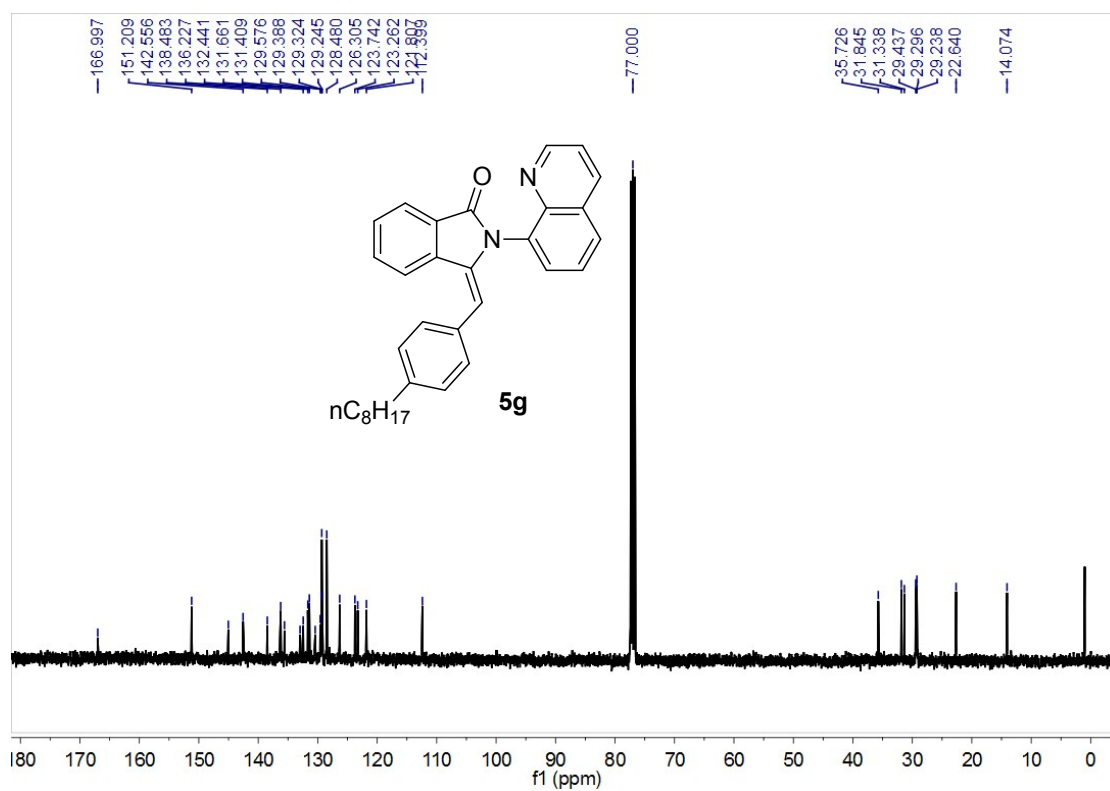

### <sup>1</sup>H NMR Spectrum of **3a**

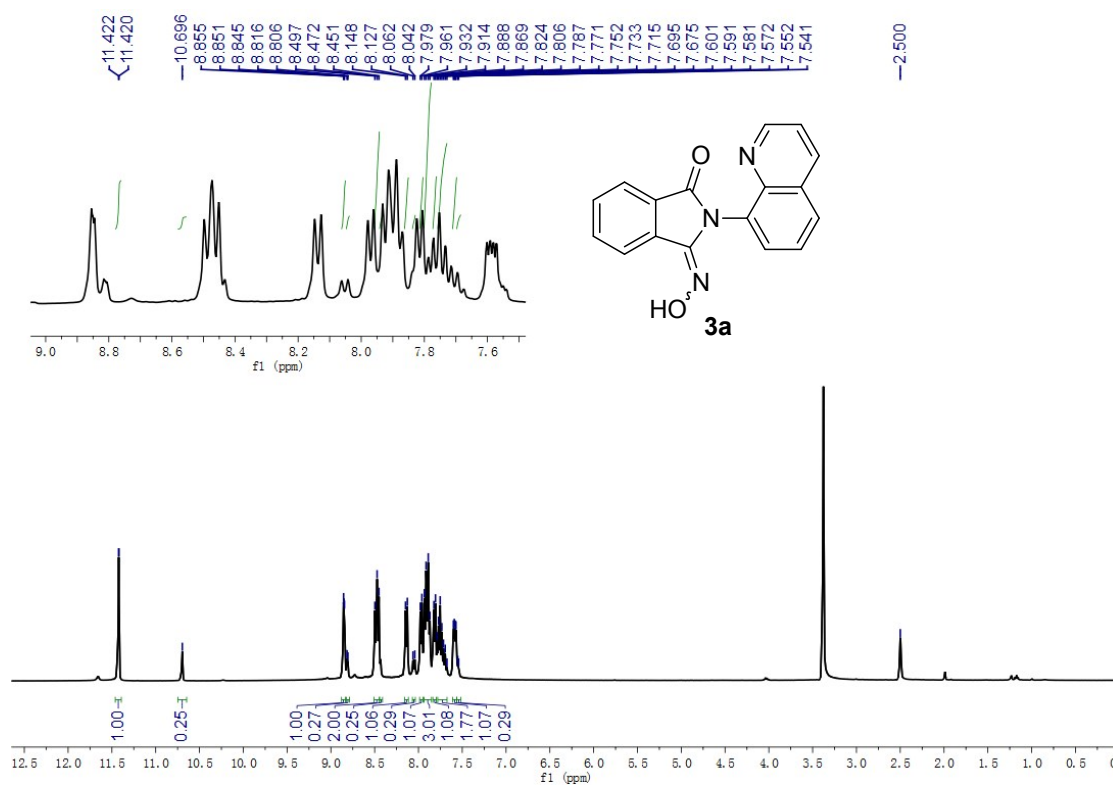

### <sup>13</sup>C NMR Spectrum of **3a**

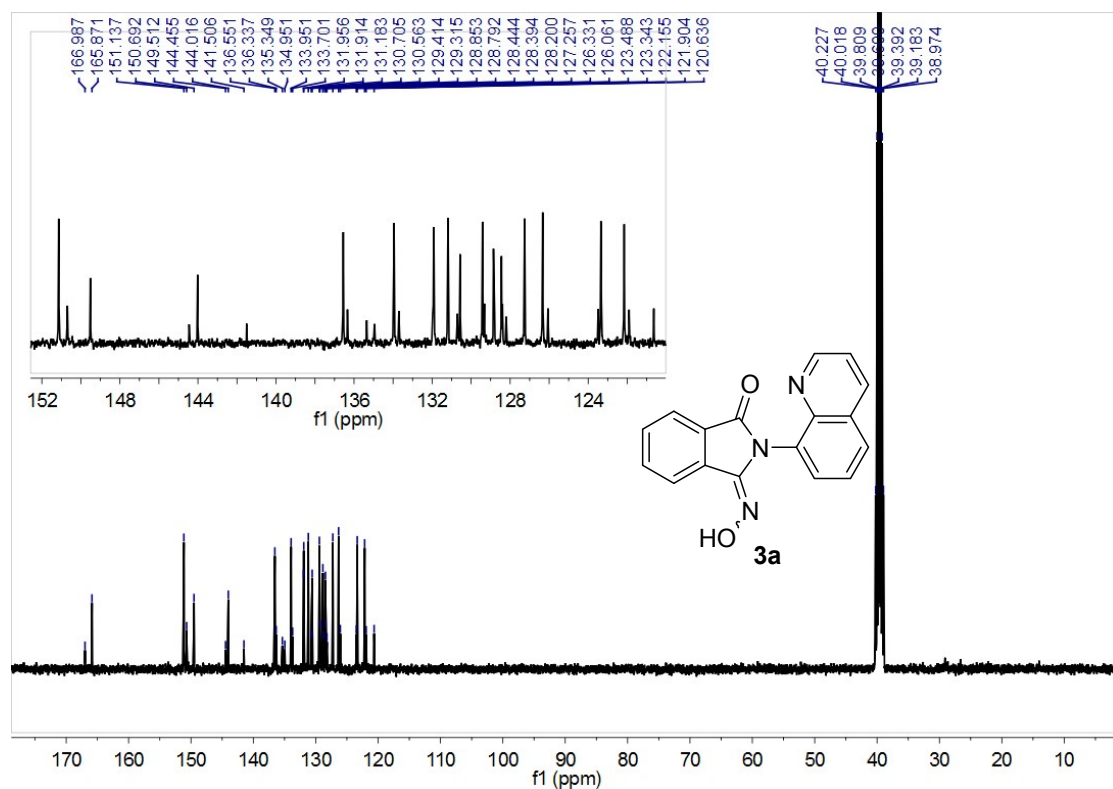

### <sup>1</sup>H NMR Spectrum of **3b**

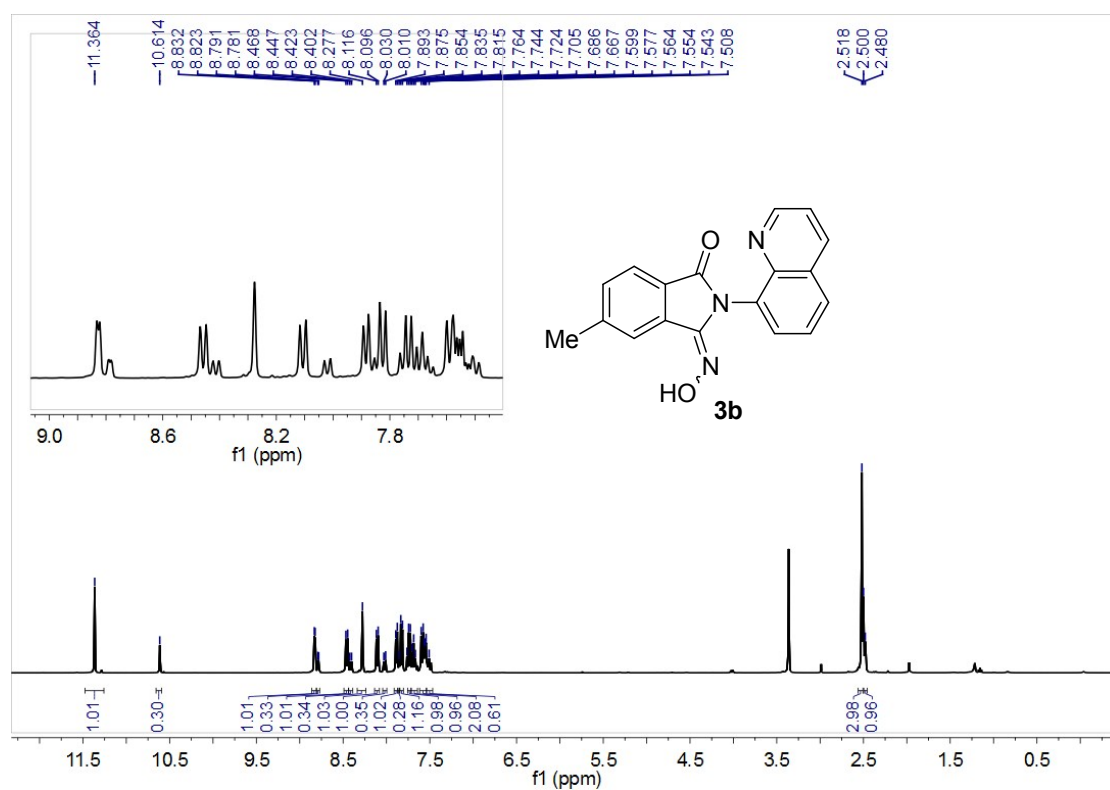

### <sup>13</sup>C NMR Spectrum of **3b**

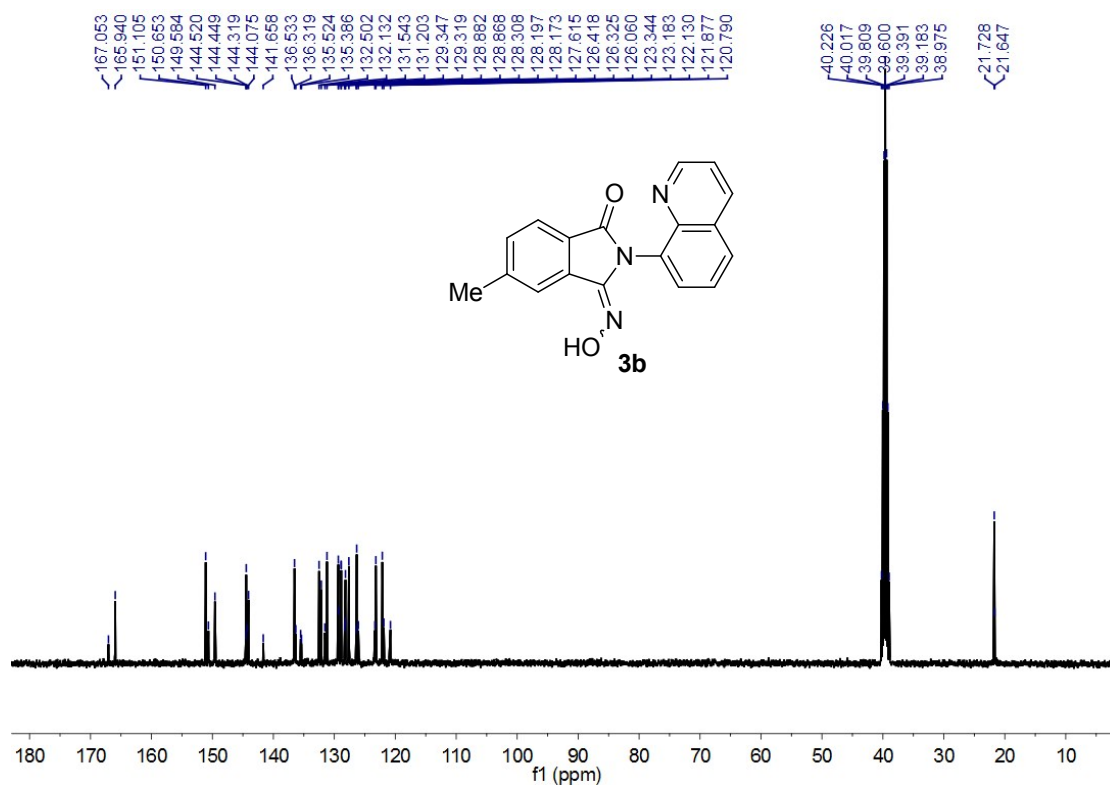

### <sup>1</sup>H NMR Spectrum of **3c**

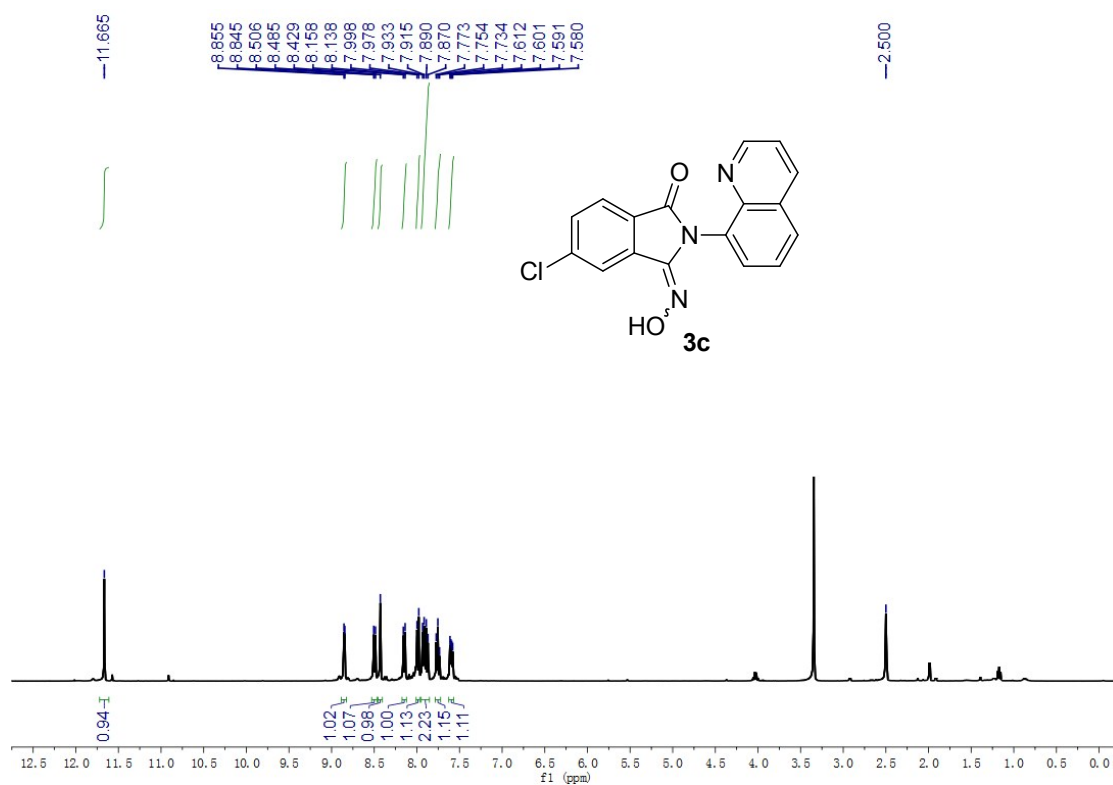

### <sup>13</sup>C NMR Spectrum of **3c**

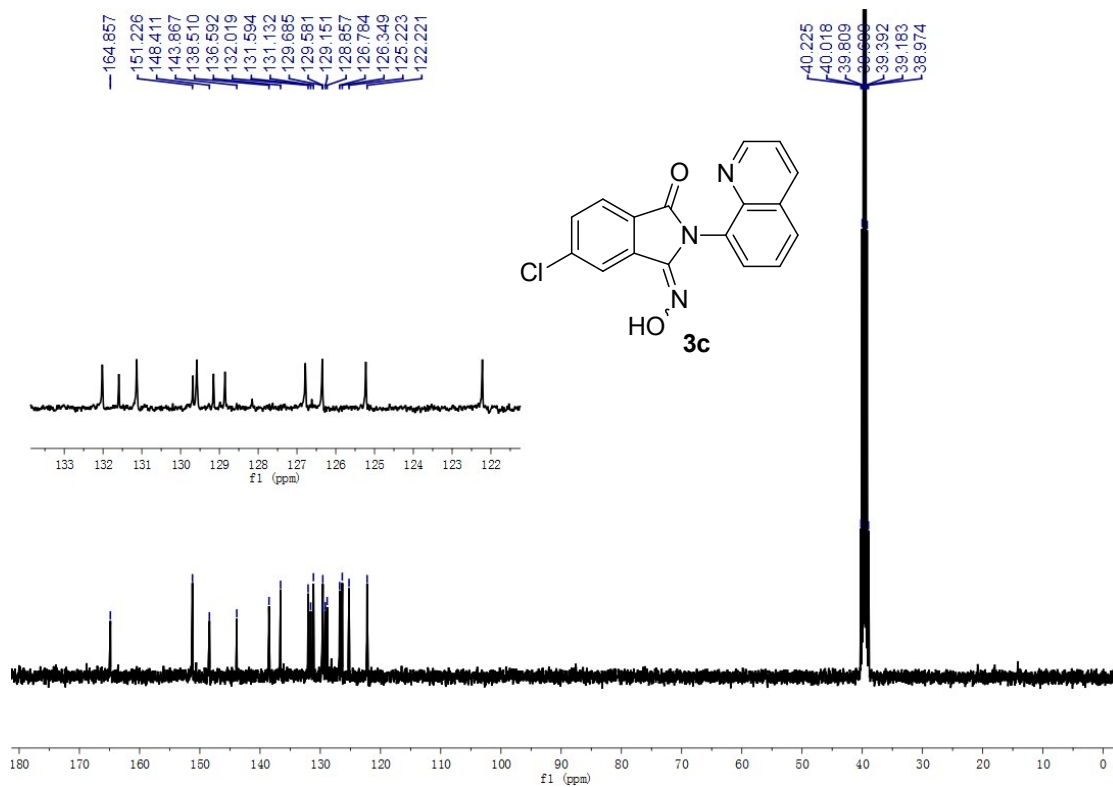

### <sup>1</sup>H NMR Spectrum of 3d

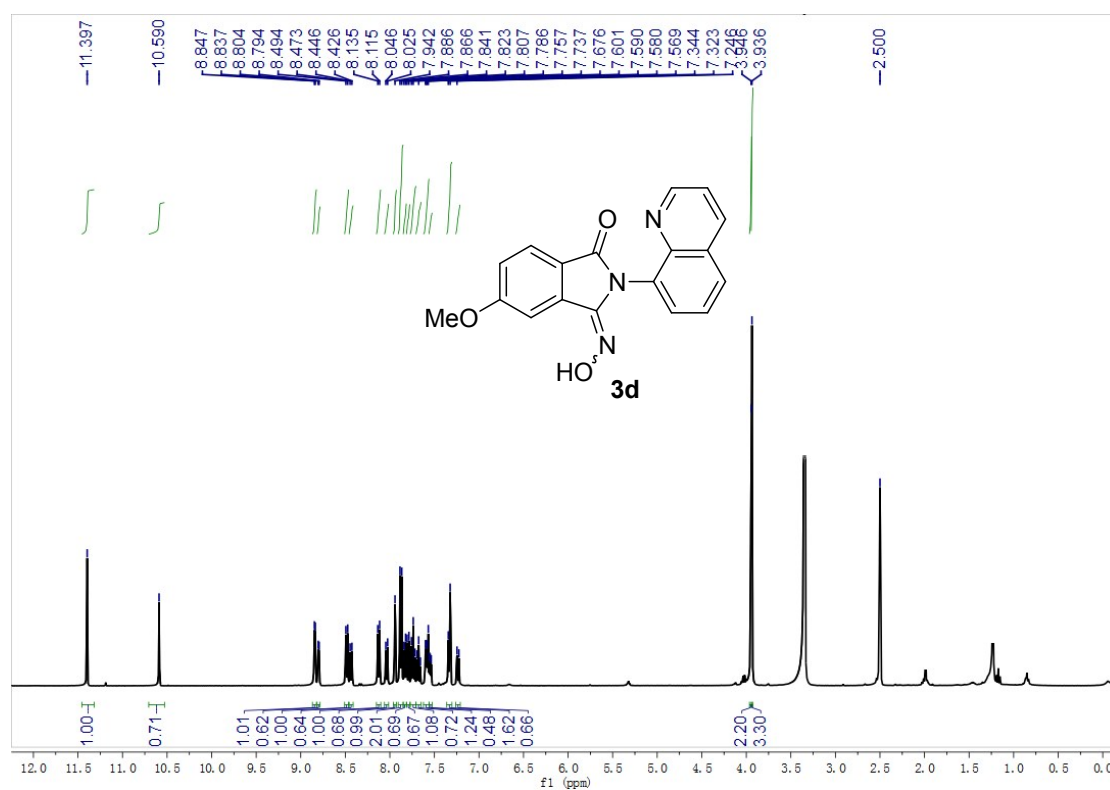

### <sup>13</sup>C NMR Spectrum of 3d

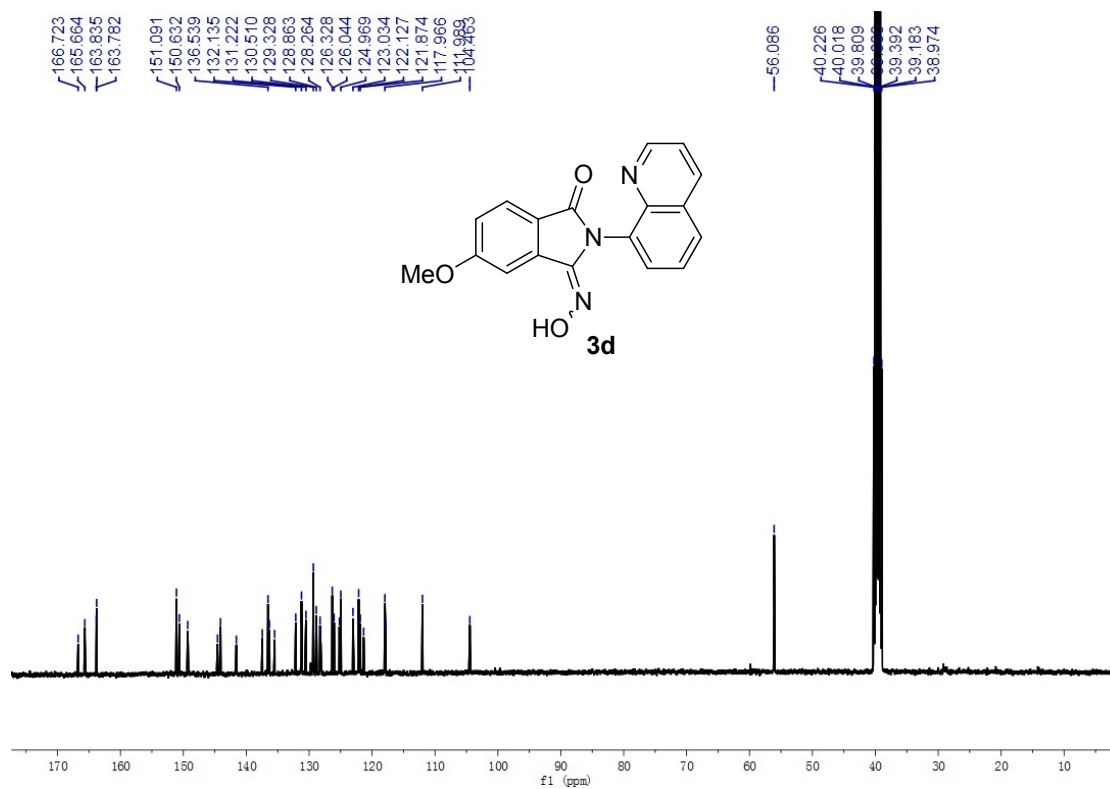

### <sup>1</sup>H NMR Spectrum of 3e

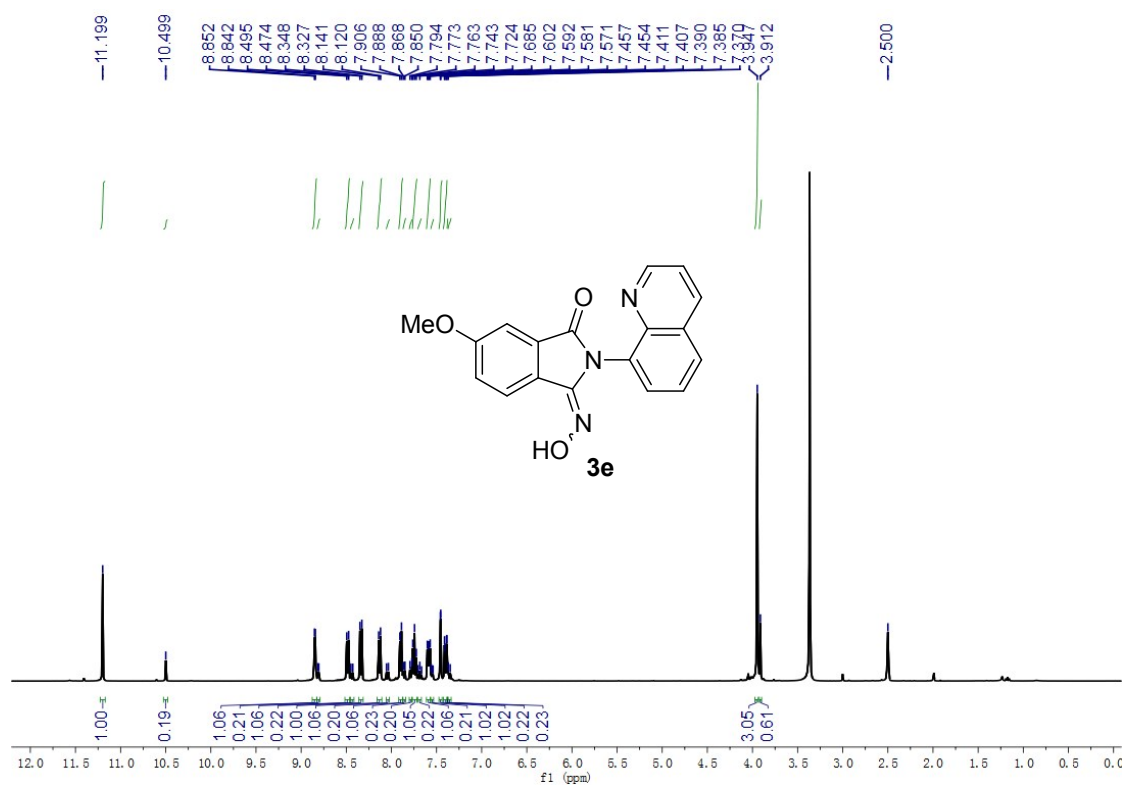

### <sup>13</sup>C NMR Spectrum of 3e

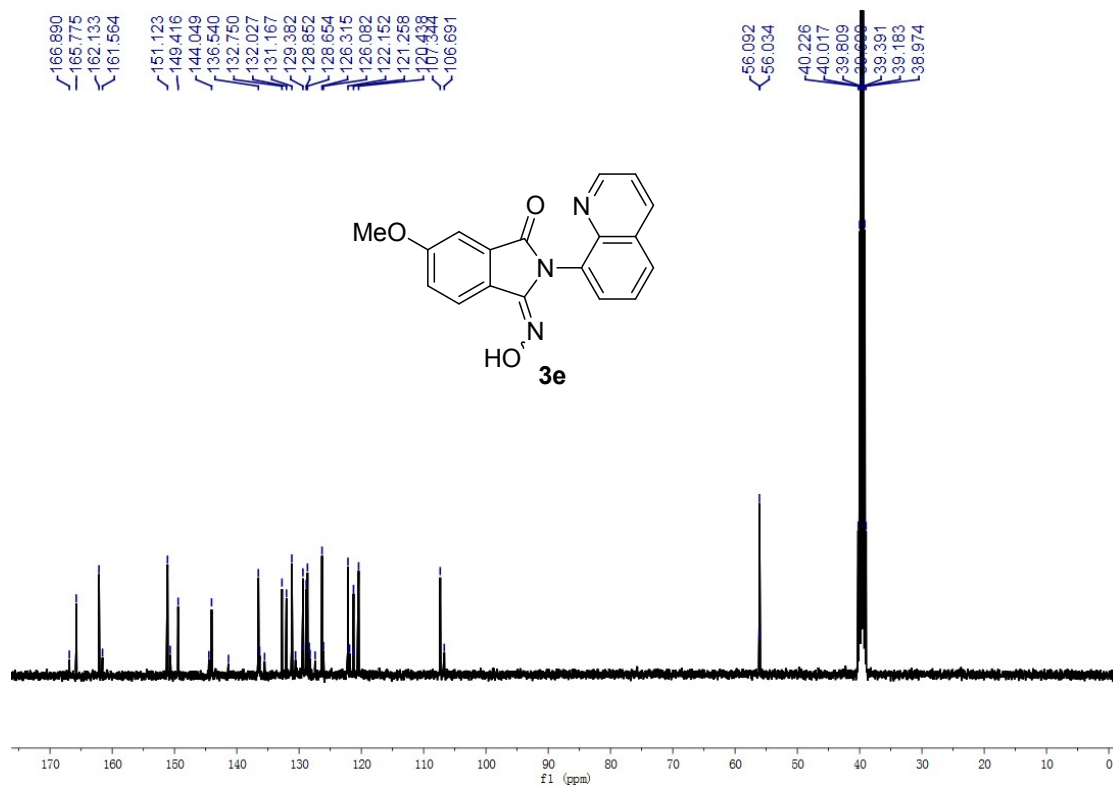



### <sup>1</sup>H NMR Spectrum of **3f**

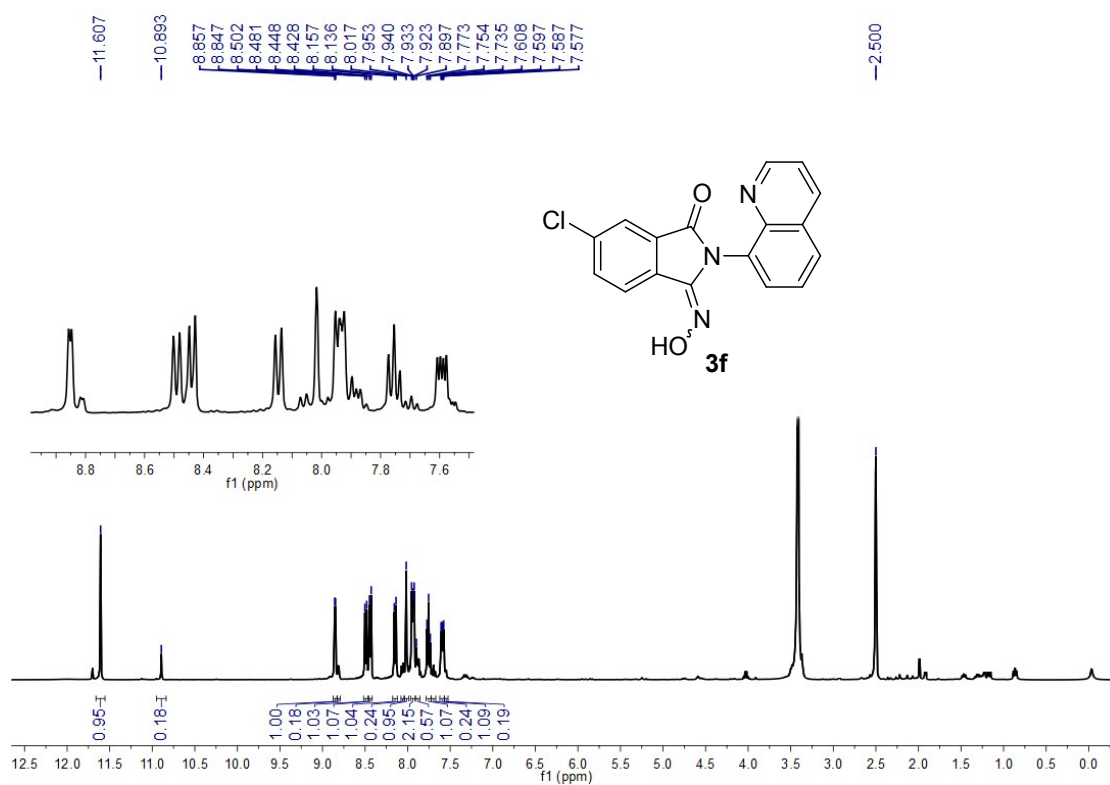

### <sup>13</sup>C NMR Spectrum of **3f**

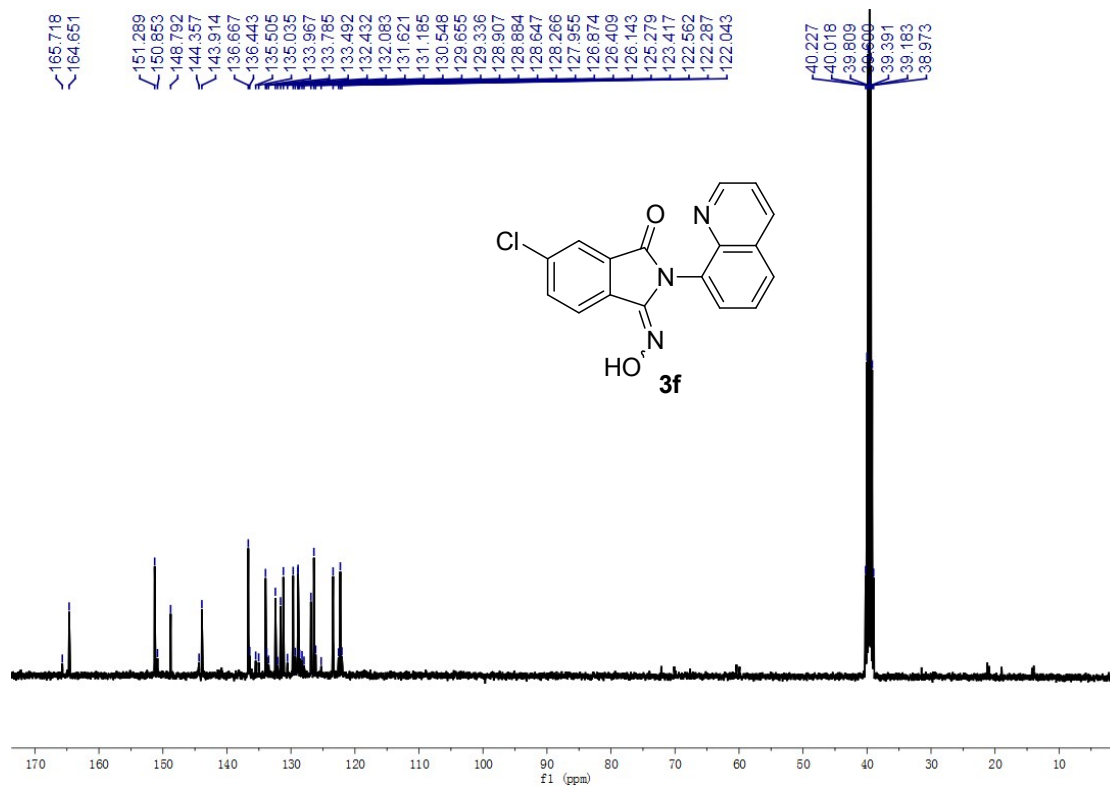

### <sup>1</sup>H NMR Spectrum of **3g**

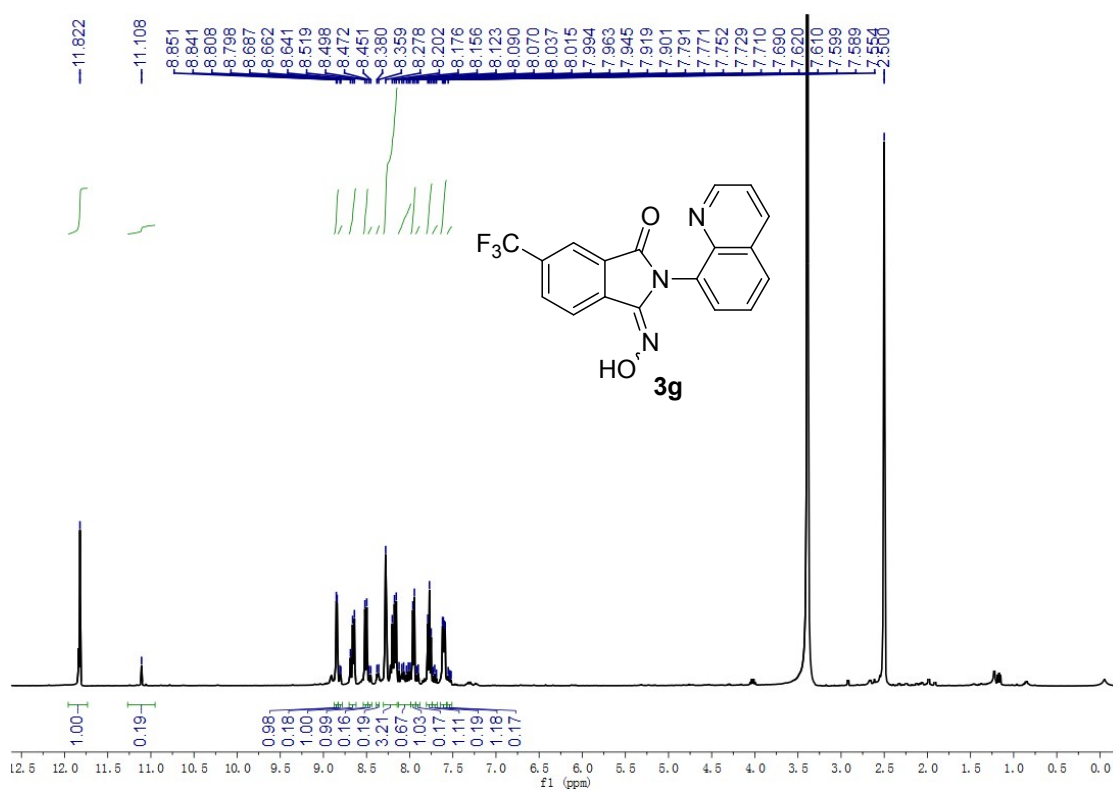

### <sup>13</sup>C NMR Spectrum of **3g**

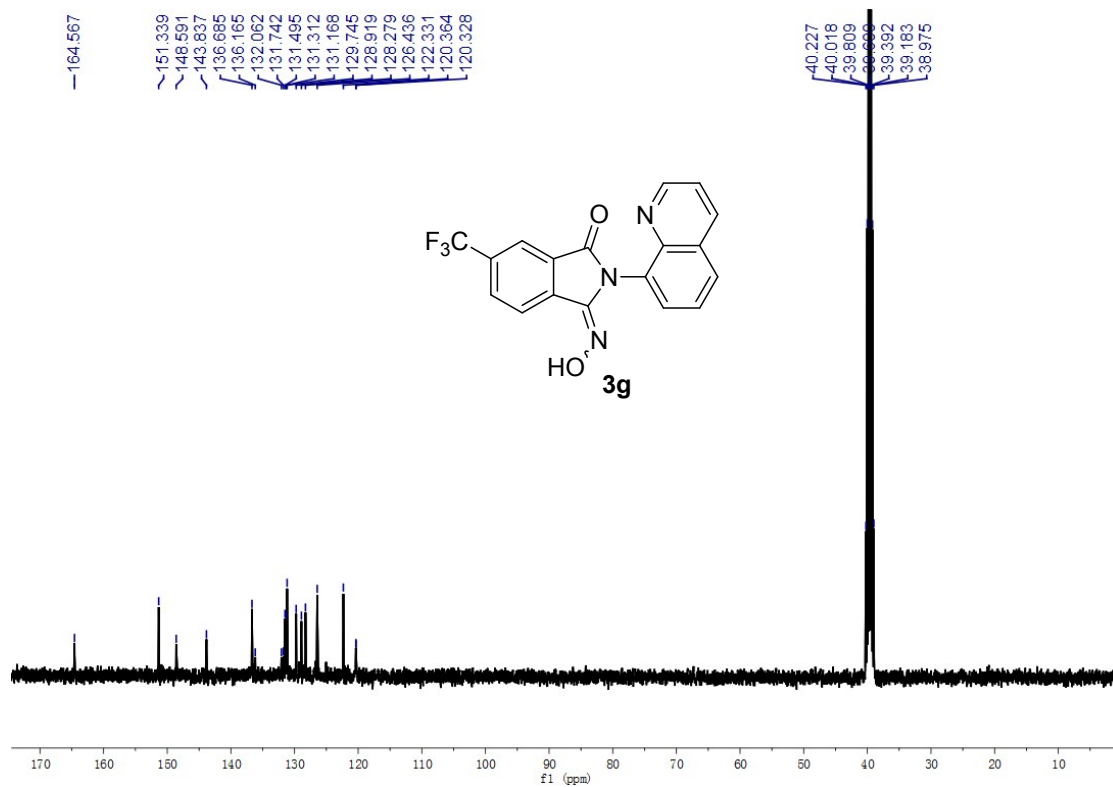

### <sup>1</sup>H NMR Spectrum of 3h

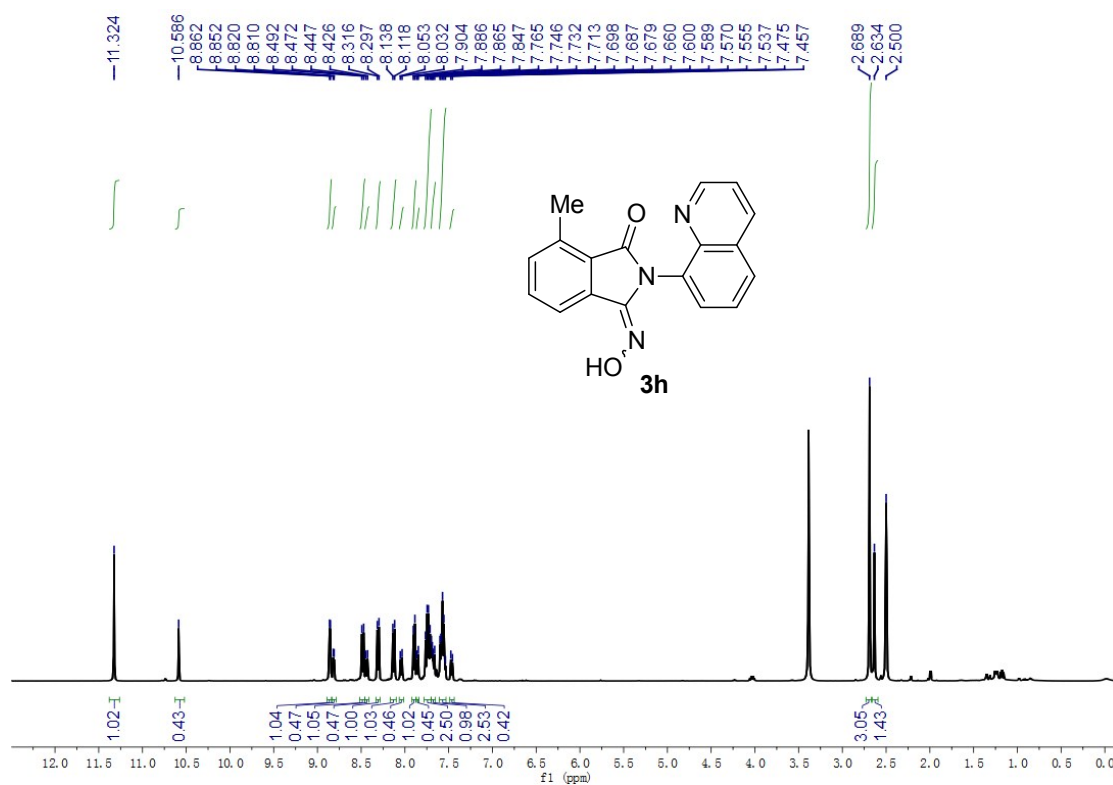

### <sup>13</sup>C NMR Spectrum of 3h

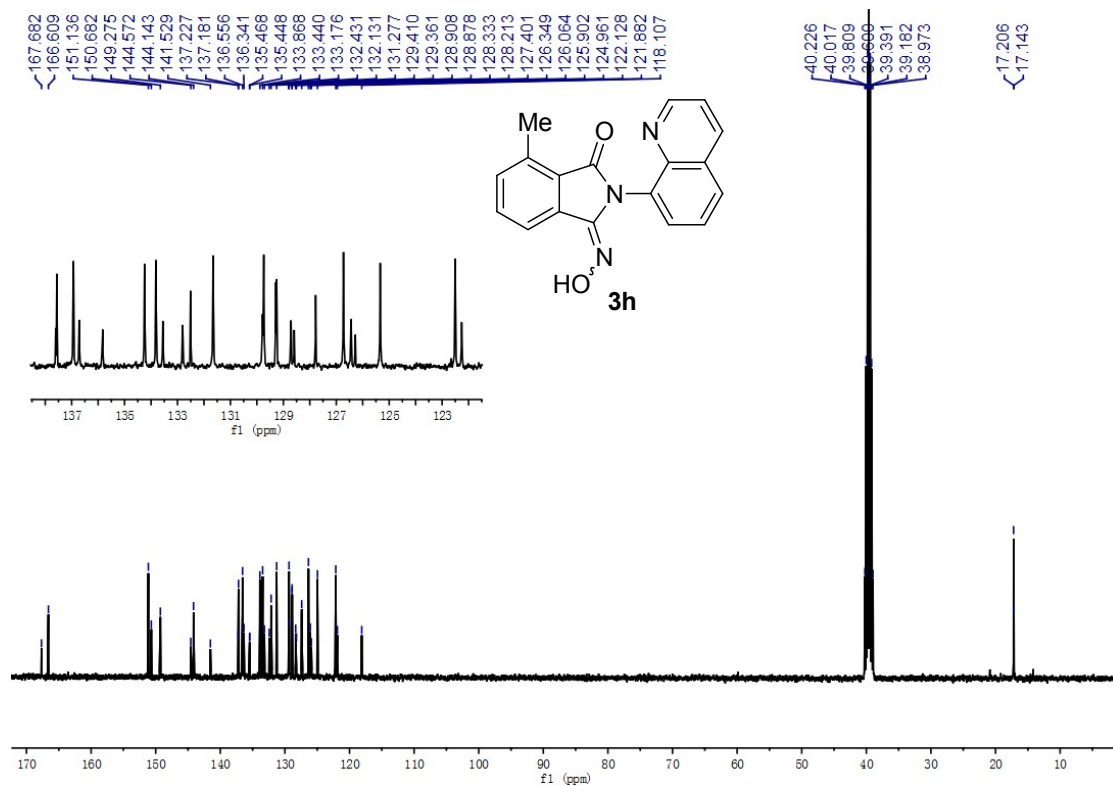

### <sup>1</sup>H NMR Spectrum of **3i**

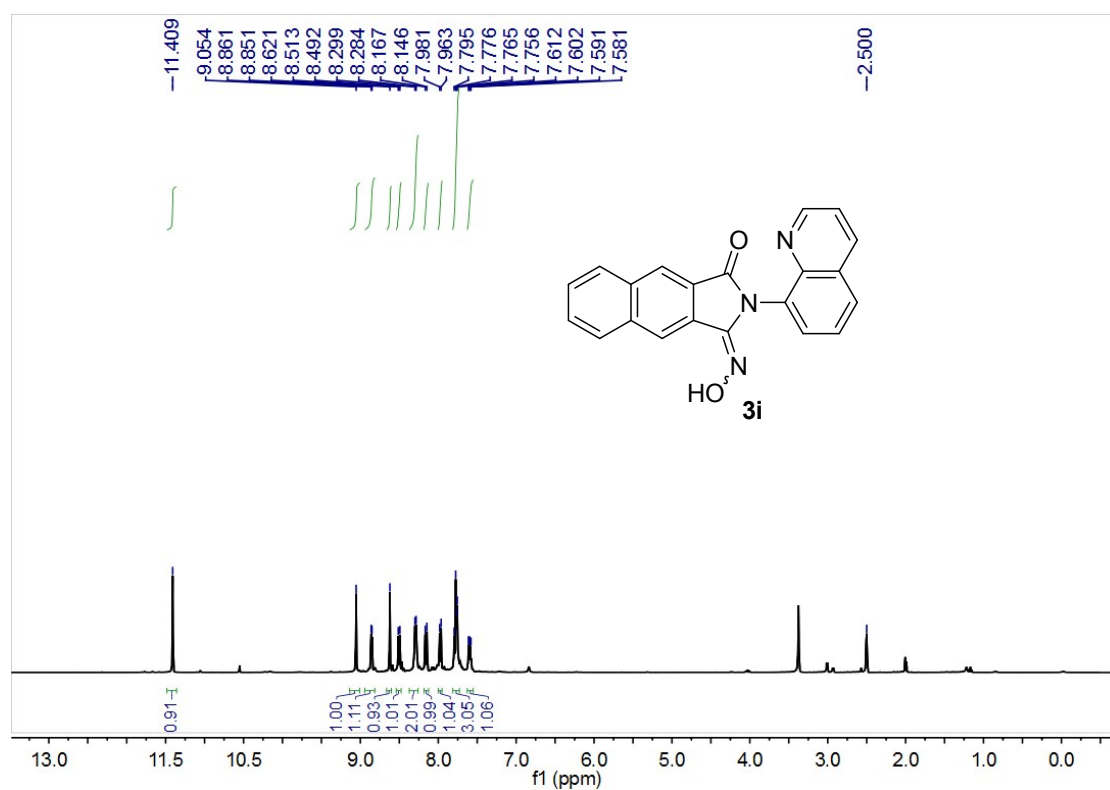

### <sup>13</sup>C NMR Spectrum of **3i**

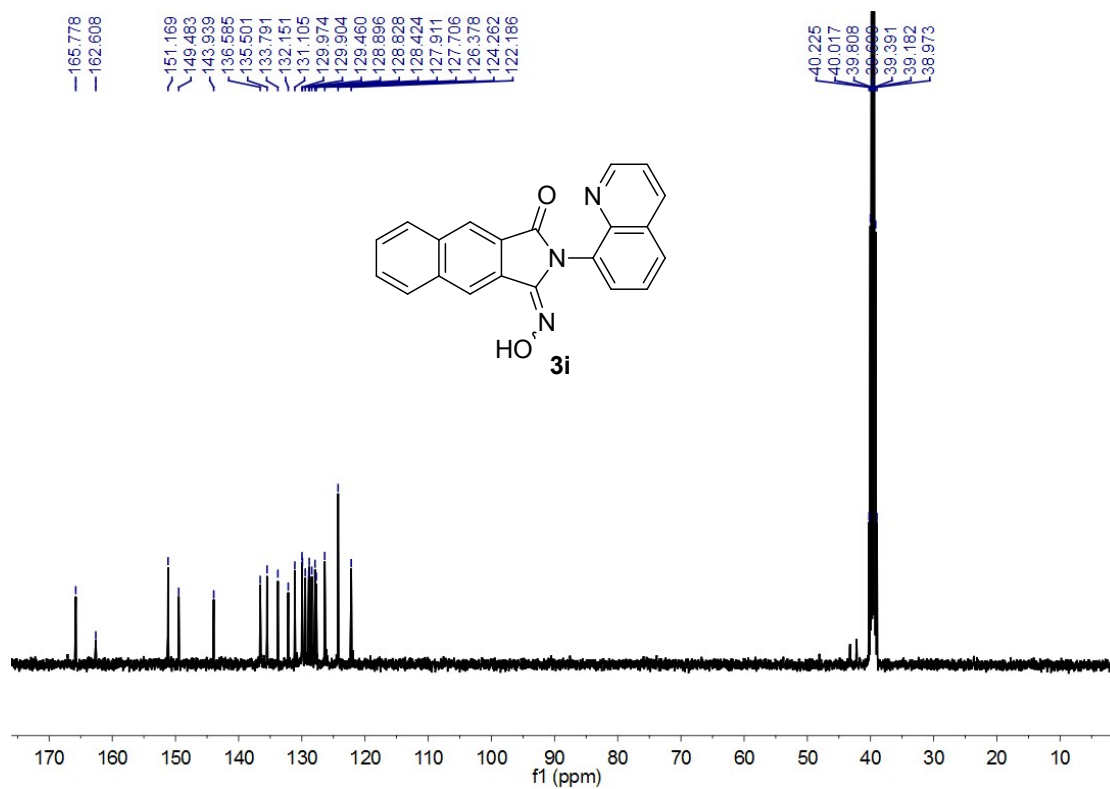

### <sup>1</sup>H NMR Spectrum of 4p'

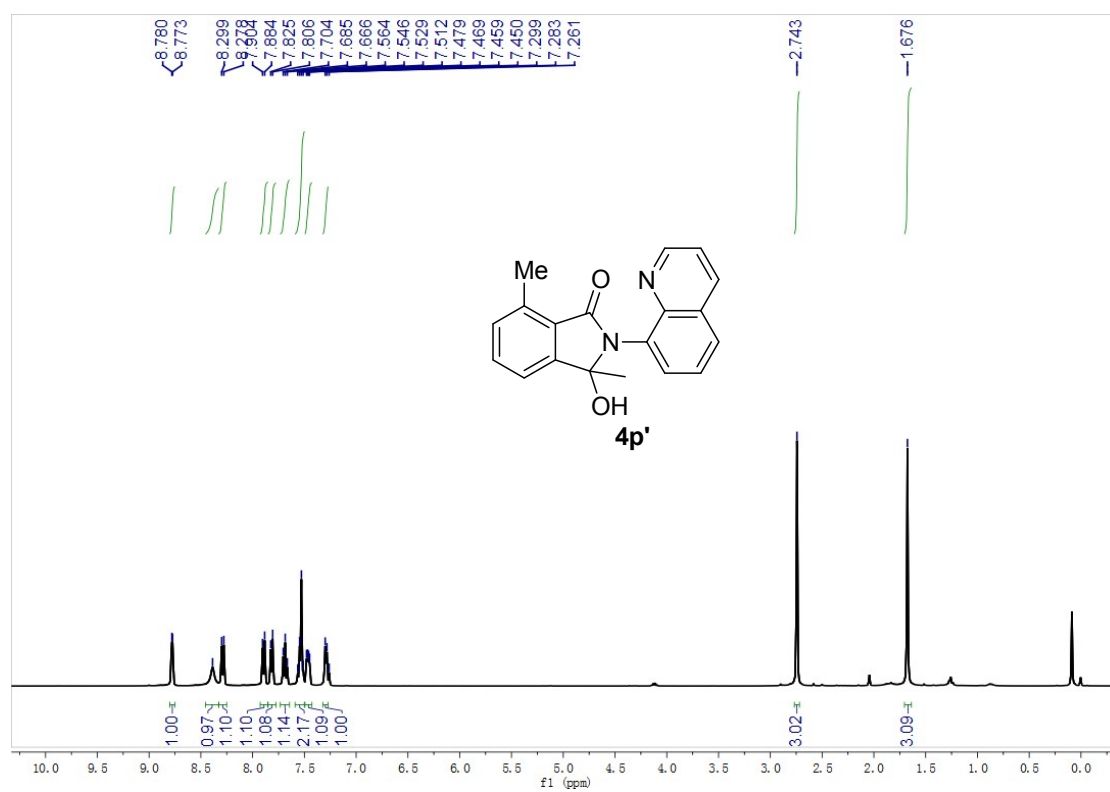

### <sup>13</sup>C NMR Spectrum of 4p'

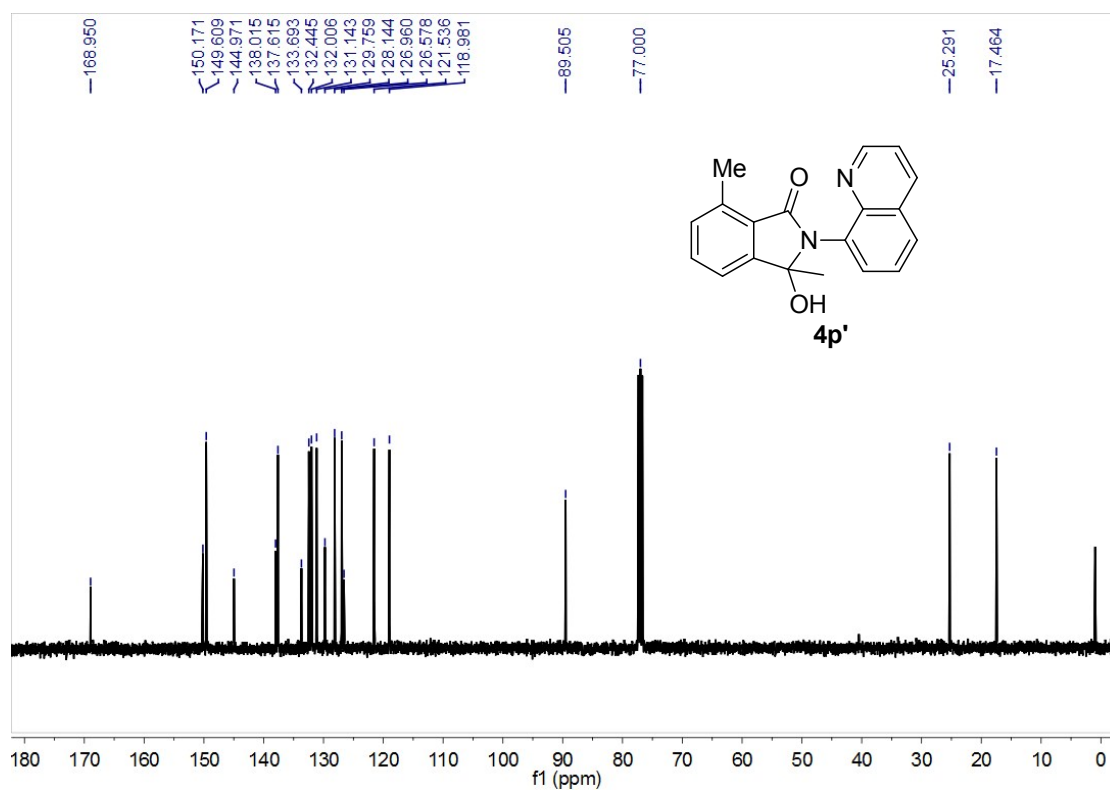

### <sup>1</sup>H NMR Spectrum of **4q'**

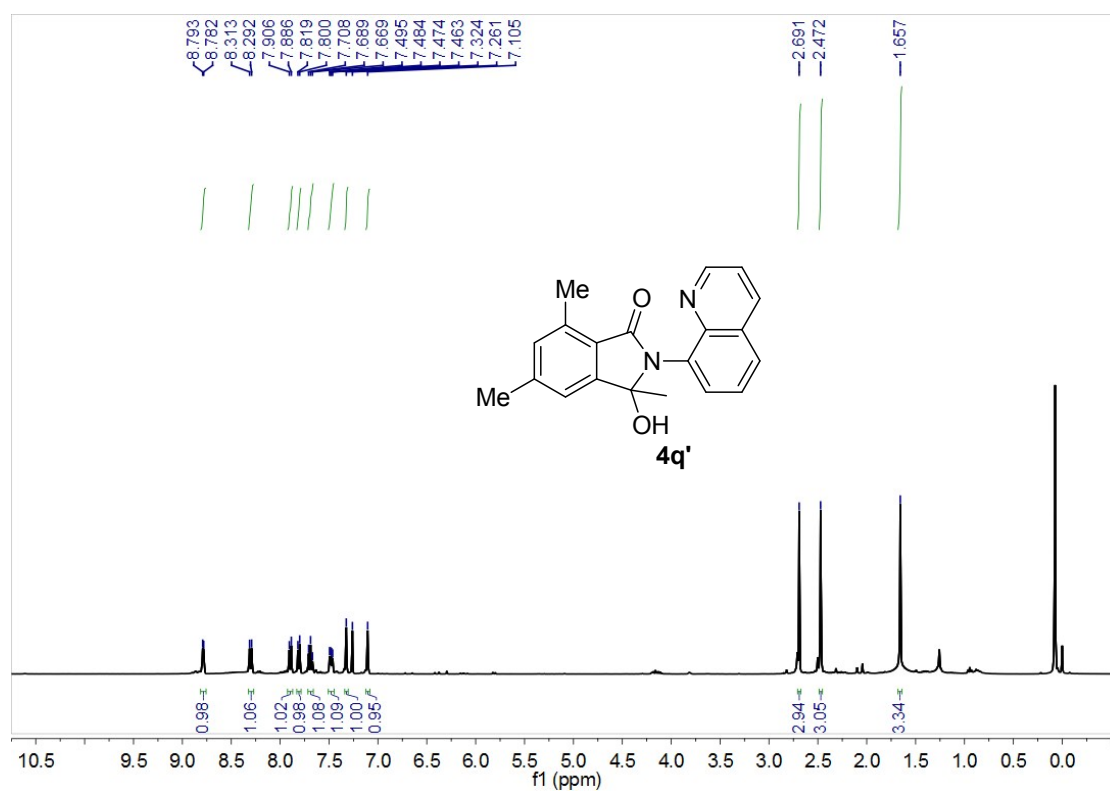

### <sup>13</sup>C NMR Spectrum of **4q'**

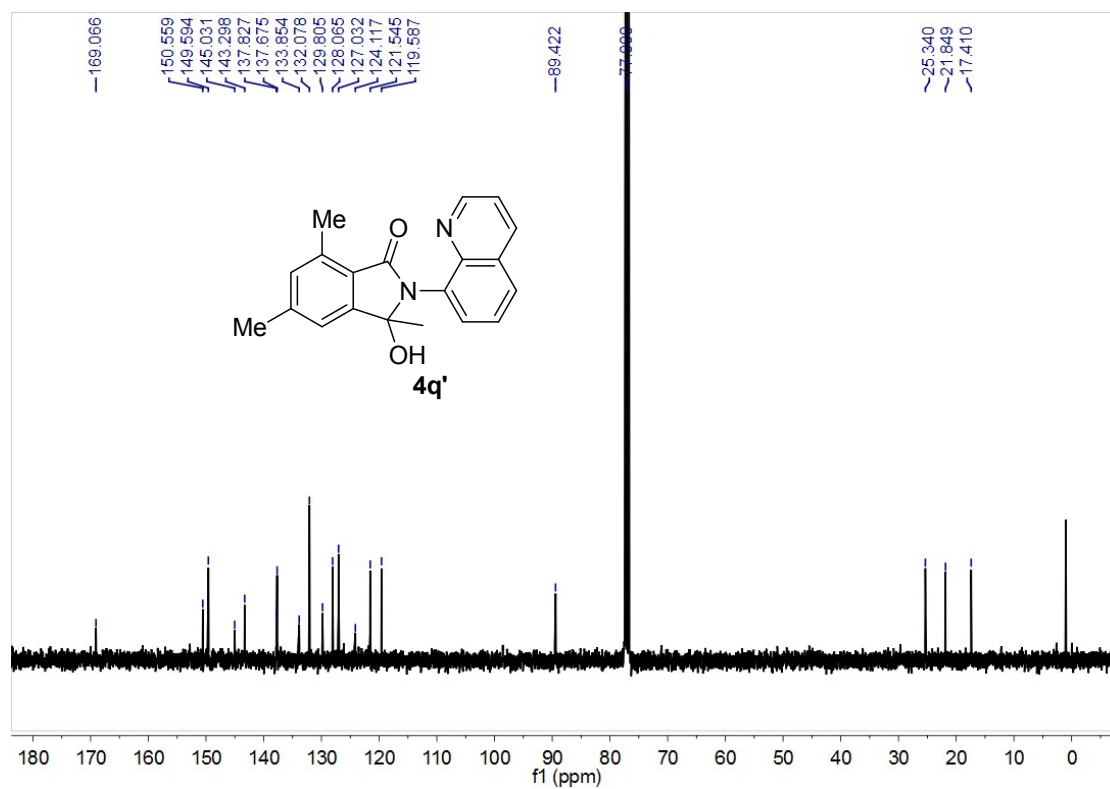

# <sup>1</sup>H-<sup>1</sup>H NOESY spectrum of 3c

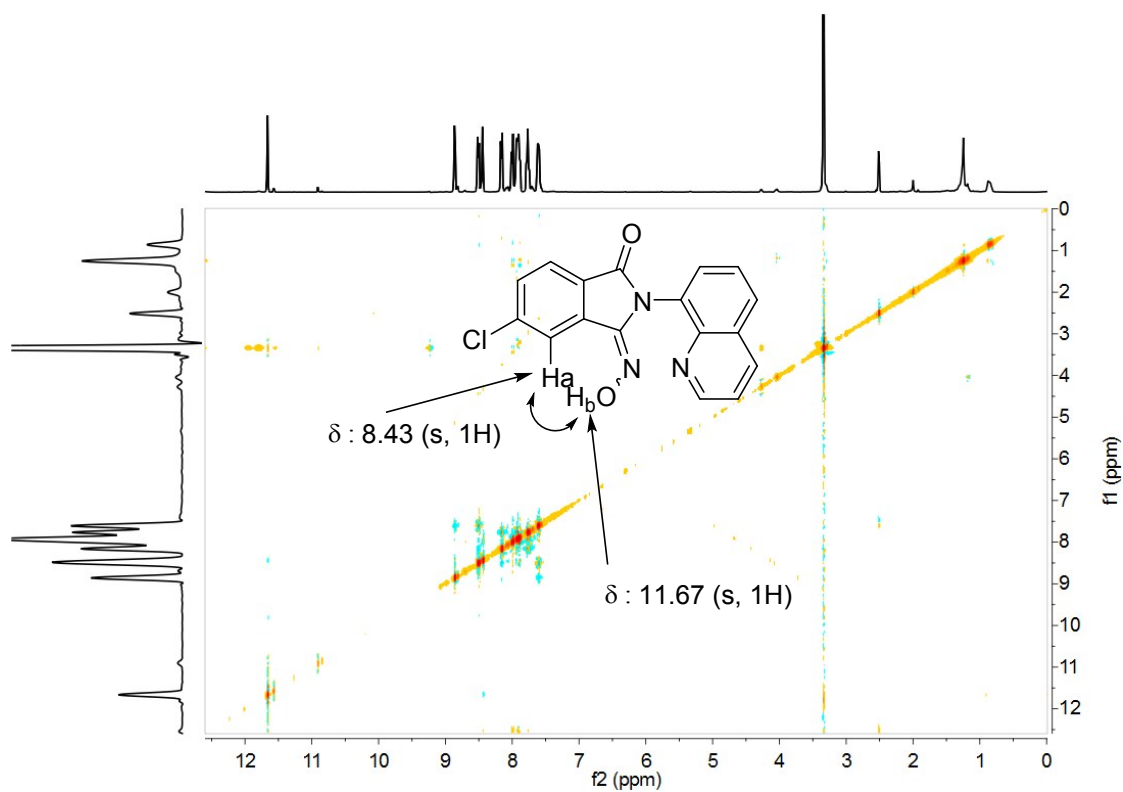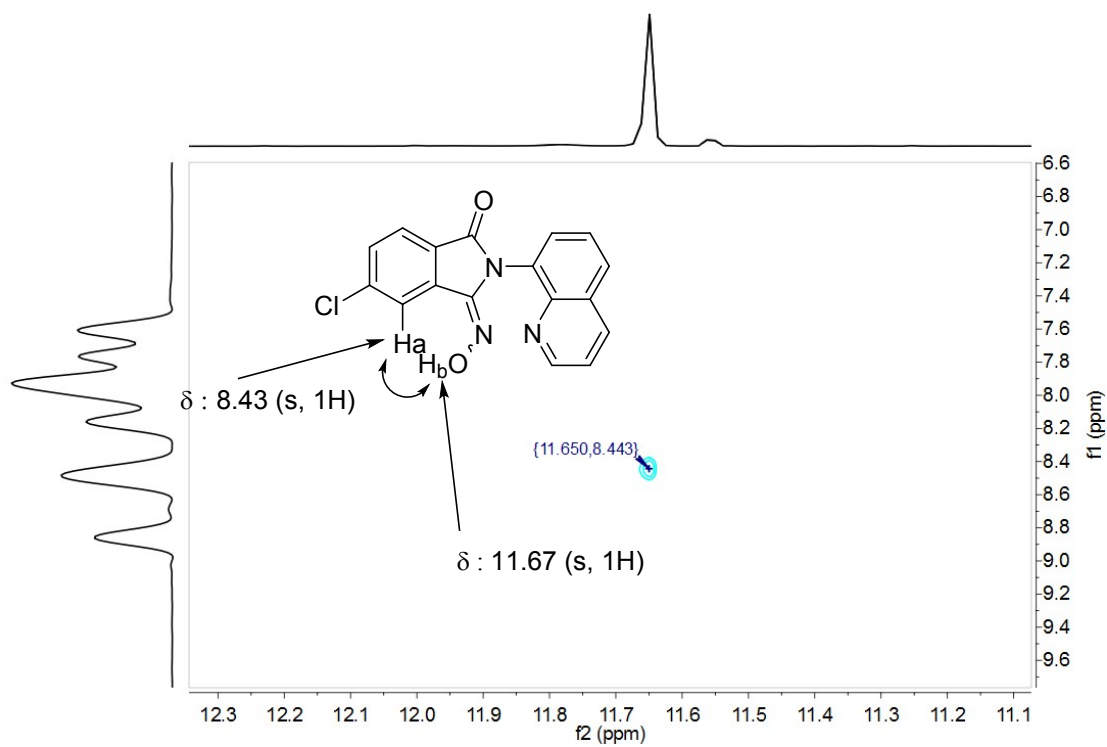

Partial enlarged view of <sup>1</sup>H-<sup>1</sup>H NOESY spectrum of 3c
